# Supplementary material
Source: PubMed Central journal article supplement (PMC4789671)

## SUPPORTING INFORMATION

### Cathepsin B Inhibitors: Combining Dipeptide Nitriles with an Occluding Loop Recognition Element by Click Chemistry

Janina Schmitz,<sup>§,†</sup> Tianwei Li,<sup>§</sup> Ulrike Bartz,<sup>†</sup> and Michael Gütschow<sup>§,\*</sup>

<sup>§</sup> Pharmaceutical Institute, Pharmaceutical Chemistry I, University of Bonn, An der Immenburg 4, D-53121 Bonn, Germany

<sup>†</sup> Department of Natural Sciences, University of Applied Sciences Bonn-Rhein-Sieg, von-Liebig-Strasse 20, D-53359 Rheinbach, Germany

#### Table of Contents

|                                                                                                           |     |
|-----------------------------------------------------------------------------------------------------------|-----|
| Table S1. Kinetic Evaluation of Dipeptide Nitrile Inhibitors at Human Cathepsin B .....                   | S2  |
| Figure S1. Structures of Cathepsin B Inhibitors .....                                                     | S11 |
| Figure S2. Progress Curves and IC <sub>50</sub> Determination for Cathepsin B Inhibition by <b>17</b> ... | S12 |
| Scheme S1. Synthesis of Dipeptide Nitriles <b>9-11</b> .....                                              | S13 |
| Scheme S2. Synthesis of Dipeptide Nitriles <b>12</b> and <b>13</b> .....                                  | S14 |
| Scheme S3. Synthesis of Dipeptide Nitriles <b>14</b> and <b>15</b> .....                                  | S15 |
| Scheme S4. Synthesis of Dipeptide Nitriles <b>16</b> and <b>17</b> .....                                  | S16 |
| Scheme S5. Synthesis of Dipeptide Nitriles <b>18</b> and <b>19</b> .....                                  | S17 |
| General Methods and Materials .....                                                                       | S18 |
| Synthetic Procedures .....                                                                                | S19 |
| Enzyme Inhibition Assays .....                                                                            | S36 |
| References .....                                                                                          | S39 |
| <sup>1</sup> H and <sup>13</sup> C NMR Spectra .....                                                      | S40 |

**Table S1. Kinetic Evaluation of Dipeptide Nitrile Inhibitors at Human Cathepsin B**

Values without standard errors refer to duplicate experiments with a single inhibitor concentration of 50  $\mu\text{M}$ .  $\text{IC}_{50}$  values were calculated by using the equation  $\text{IC}_{50} = [\text{I}]/(v_0/v - 1)$ , where  $v$  and  $v_0$  are the rates in the presence and absence of the inhibitor, respectively, and  $[\text{I}]$  is the inhibitor concentration. Values with standard errors refer to duplicate measurements in the presence of five different inhibitor concentrations.  $\text{IC}_{50}$  values were determined by nonlinear regression using equation  $v = v_0/(1+[\text{I}]/\text{IC}_{50})$ . Standard error of the mean (SEM) values refer to this nonlinear regression.  $K_i$  values  $\pm$  SEM were calculated from  $\text{IC}_{50}$  values by applying the equation  $K_i = \text{IC}_{50}/(1+[\text{S}]/K_m)$ , where  $[\text{S}]$  is the substrate concentration.

|    | compound                                                                            | $[\text{I}]$ ( $\mu\text{M}$ ) | $K_i$ ( $\mu\text{M}$ ) |
|----|-------------------------------------------------------------------------------------|--------------------------------|-------------------------|
| 51 | 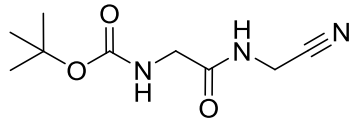   | 50                             | >500                    |
| 52 |  | 50                             | >500                    |
| 53 |  |                                | $14.6 \pm 0.8$          |
| 54 |  | 50                             | 22                      |
| 55 |  | 50                             | 25                      |

|    |                                                                                     |    |             |
|----|-------------------------------------------------------------------------------------|----|-------------|
| 56 | 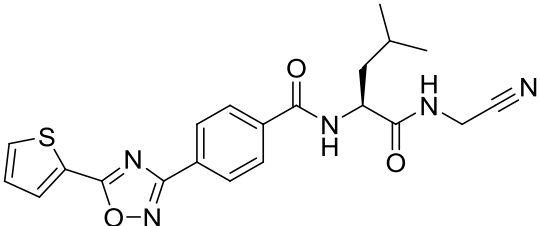   |    | 2.89 ± 0.13 |
| 57 |    | 50 | 48          |
| 58 |    | 50 | 190         |
| 59 |   | 50 | 68          |
| 60 |  | 50 | 79          |
| 61 |  | 50 | 280         |
| 62 |  | 50 | 61          |
| 63 |  | 50 | >500        |

|    |                                                                                     |    |                |
|----|-------------------------------------------------------------------------------------|----|----------------|
| 64 | 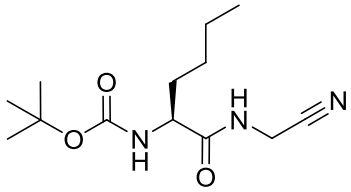   | 50 | 52             |
| 65 |    |    | $13.4 \pm 1.7$ |
| 66 |    | 50 | 36             |
| 67 |   | 50 | 72             |
| 68 |  | 50 | 52             |
| 69 |  | 50 | >500           |
| 70 |  | 50 | 370            |

|    |                                                                                     |    |      |
|----|-------------------------------------------------------------------------------------|----|------|
| 71 | 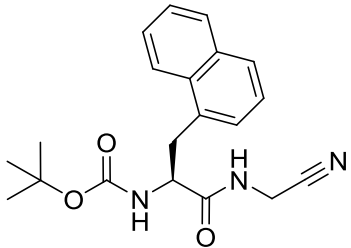   | 50 | 240  |
| 72 |    | 50 | 52   |
| 73 |    | 50 | >500 |
| 74 |   | 50 | 27   |
| 75 |  | 50 | 43   |
| 76 |  | 50 | >500 |
| 77 |  | 50 | 64   |

|    |                                                                                     |    |             |
|----|-------------------------------------------------------------------------------------|----|-------------|
| 78 | 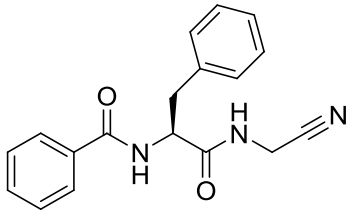   |    | 6.79 ± 0.44 |
| 79 |    | 50 | 48          |
| 80 |    | 50 | 70          |
| 81 |   | 50 | 29          |
| 82 |  | 50 | 80          |
| 83 |  | 50 | 340         |
| 84 |  | 50 | 470         |
| 85 |  | 50 | 34          |

|    |                                                                                     |    |                 |
|----|-------------------------------------------------------------------------------------|----|-----------------|
| 86 | 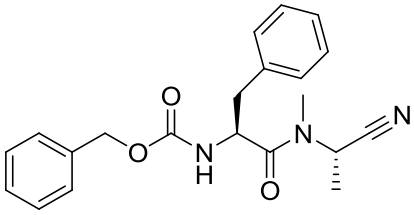   | 50 | 200             |
| 87 |    | 50 | >500            |
| 88 |    | 10 | 31              |
| 89 |   |    | $12.2 \pm 2.0$  |
| 90 |  | 50 | 21              |
| 91 |  |    | $0.76 \pm 0.06$ |
| 92 |  | 5  | 9.9             |

|    |                                                                                     |    |                 |
|----|-------------------------------------------------------------------------------------|----|-----------------|
| 93 | 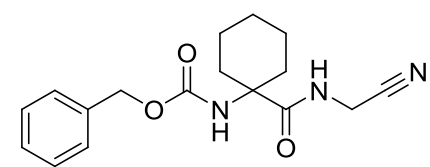   | 50 | 53              |
| 94 |    | 50 | 59              |
| 95 |    |    | $4.94 \pm 1.31$ |
| 96 |   | 50 | 36              |
| 97 |  |    | $16.6 \pm 0.8$  |
| 98 |  |    | $0.80 \pm 0.04$ |
| 99 |  |    | $0.33 \pm 0.03$ |



|   |  |                  |
|---|--|------------------|
| 1 |  | $3.46 \pm 0.19$  |
| 2 |  | $5.17 \pm 0.37$  |
| 3 |  | $5.35 \pm 0.21$  |
| 4 |  | 50            37 |
| 5 |  | 50            94 |
| 6 |  | 50            32 |
| 7 |  | $3.92 \pm 0.97$  |

8

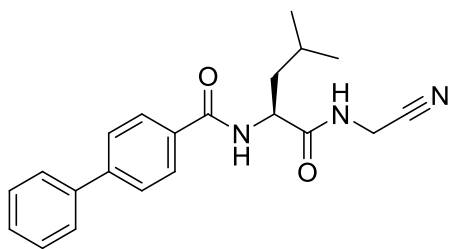

1.79 ± 0.14

---

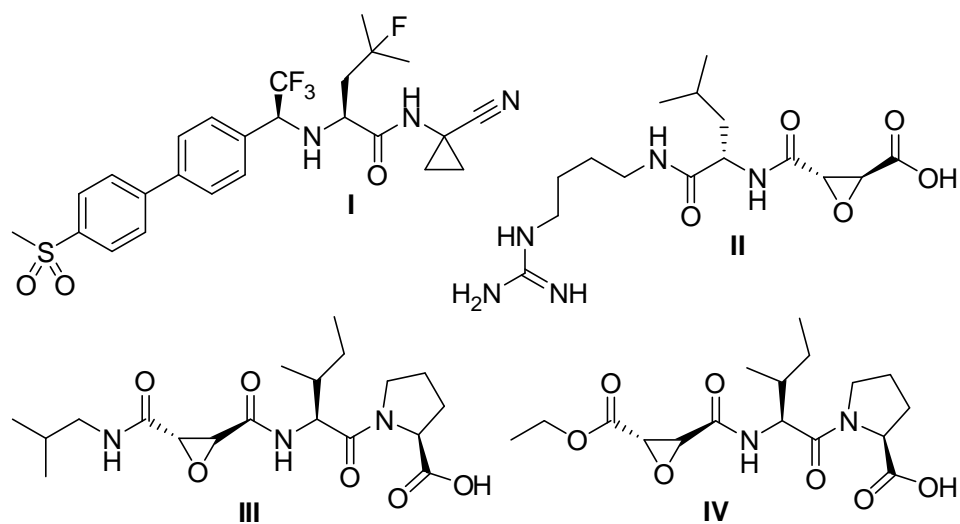

**Figure S1.** Structures of odanacatib (**I**) and the irreversible cathepsin B inhibitors E-64 (**II**), CA-074 (**III**) and CA-030 (**IV**).

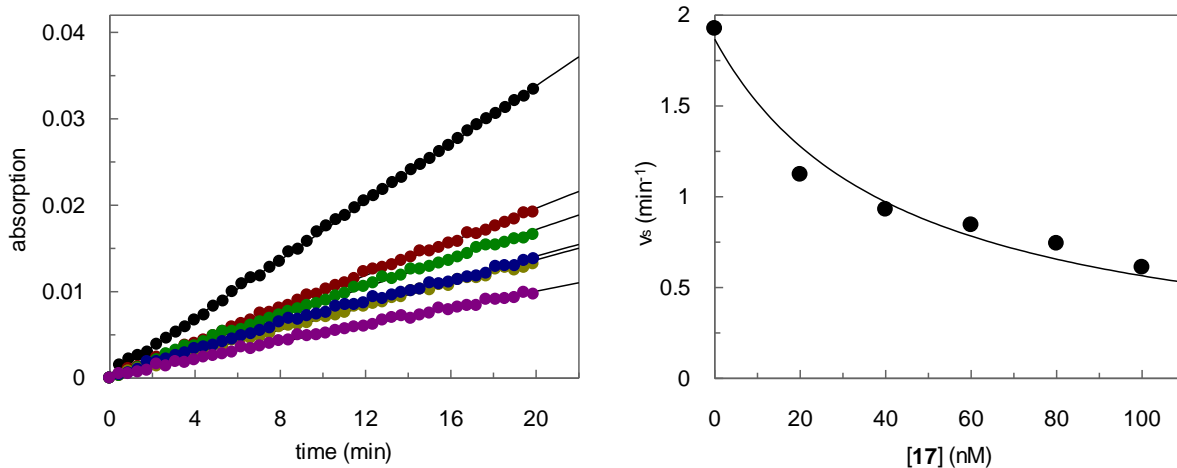

**Figure S2.** Inhibition of human cathepsin B by **17**. Left: Monitoring of the cathepsin B-catalyzed hydrolysis of Cbz-Arg-Arg-pNA at pH 4.5 in the presence of increasing inhibitor concentrations (•, 0 μM; •, 20 μM; •, 40 μM; •, 60 μM; •, 80 μM; •, 100 μM). Right: Plot of the steady-state rates  $v_s$  of hydrolysis of Cbz-Phe-Arg-pNA versus increasing concentrations of **17**. Non-linear regression gave an  $IC_{50}$  value of  $43.3 \pm 6.4$  nM and an inhibition constant of  $K_i = 27.3 \pm 4.0$  nM.

### Scheme S1. Synthesis of Dipeptide Nitriles 9-11<sup>a</sup>

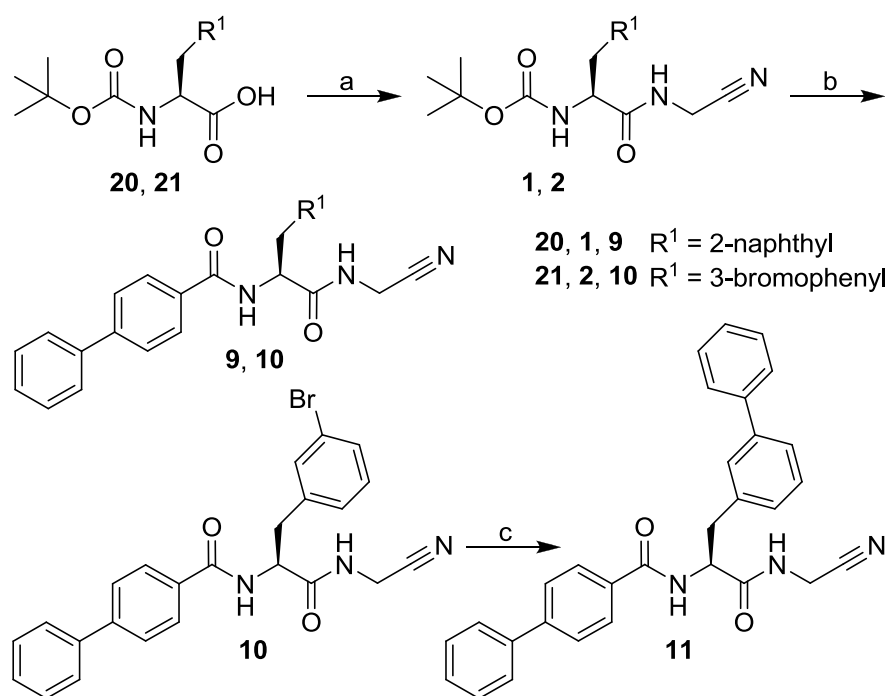

<sup>a</sup> Reagents and conditions: (a) 1. *N*-methylmorpholine, ClCO<sub>2</sub>*i*-Bu, THF, -25 °C, 2. H<sub>2</sub>NCH<sub>2</sub>CN × 0.5 H<sub>2</sub>SO<sub>4</sub>, 2N NaOH, -25 °C to rt; (b) 1. methanesulfonic acid, THF, 0 °C to rt, 2. biphenyl-4-carboxylic acid, DIPEA, HATU, CH<sub>2</sub>Cl<sub>2</sub>, rt; (c) phenylboronic acid, K<sub>2</sub>CO<sub>3</sub>, Pd(PPh<sub>3</sub>)<sub>4</sub>, dimethoxyethane, H<sub>2</sub>O, microwave, 70 °C.

**Scheme S2. Synthesis of Dipeptide Nitriles 12 and 13<sup>a</sup>**

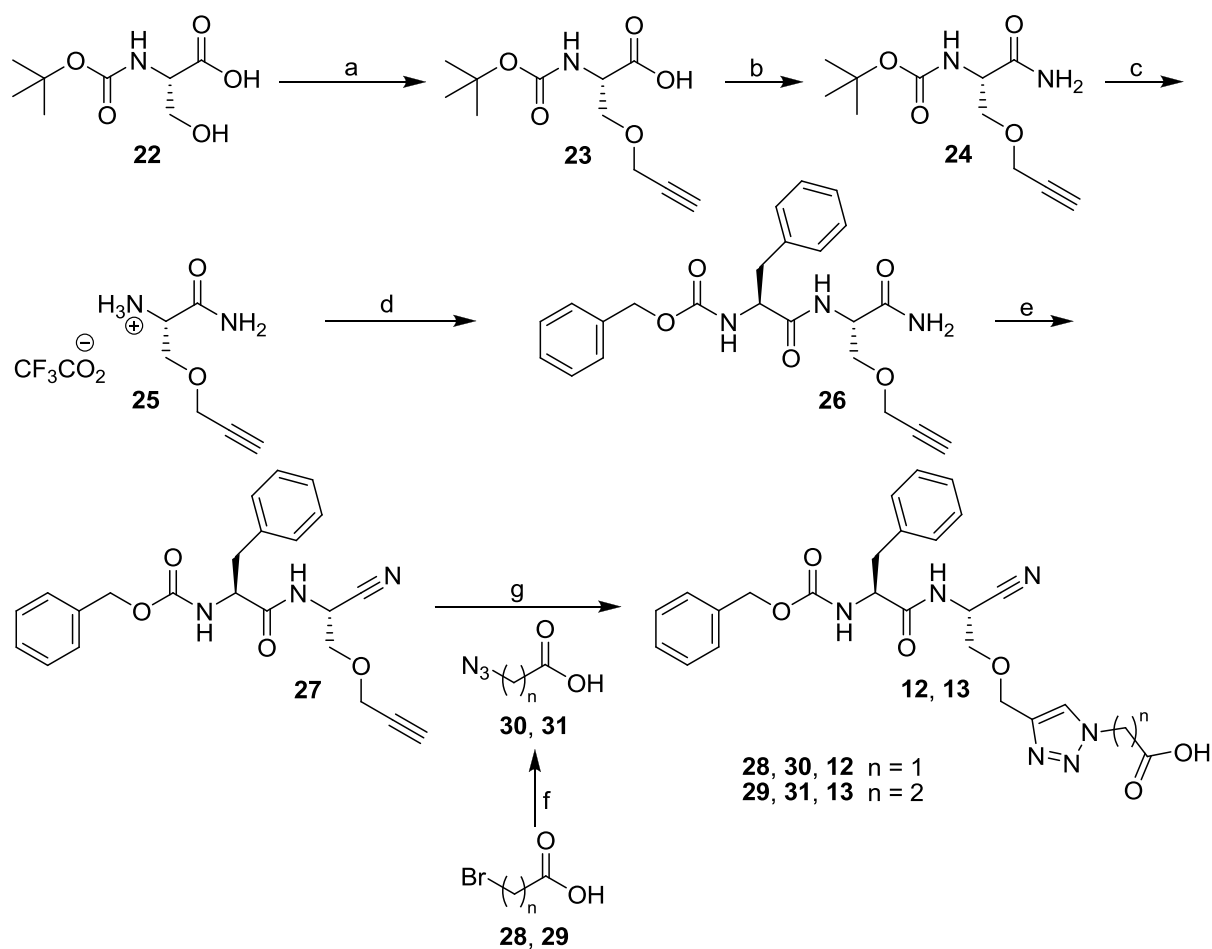

<sup>a</sup> Reagents and conditions: (a) NaH, propargyl bromide, DMF, 0 °C to rt; (b) 1. *N*-methylmorpholine, ClCO<sub>2</sub>*i*-Bu, THF, -25 °C, 2. aqueous ammonia (25%), -25 °C to rt; (c) trifluoroacetic acid, CH<sub>2</sub>Cl<sub>2</sub>, 0 °C to rt; (d) Z-Phe-OH, DIPEA, HATU, CH<sub>2</sub>Cl<sub>2</sub>, rt; (e) cyanuric chloride, DMF, rt; (f) NaN<sub>3</sub>, H<sub>2</sub>O, rt; (g) **30** or **31** CuSO<sub>4</sub> × 5 H<sub>2</sub>O, sodium ascorbate, DMSO, H<sub>2</sub>O, rt.

**Scheme S3. Synthesis of Dipeptide Nitriles 14 and 15<sup>a</sup>**

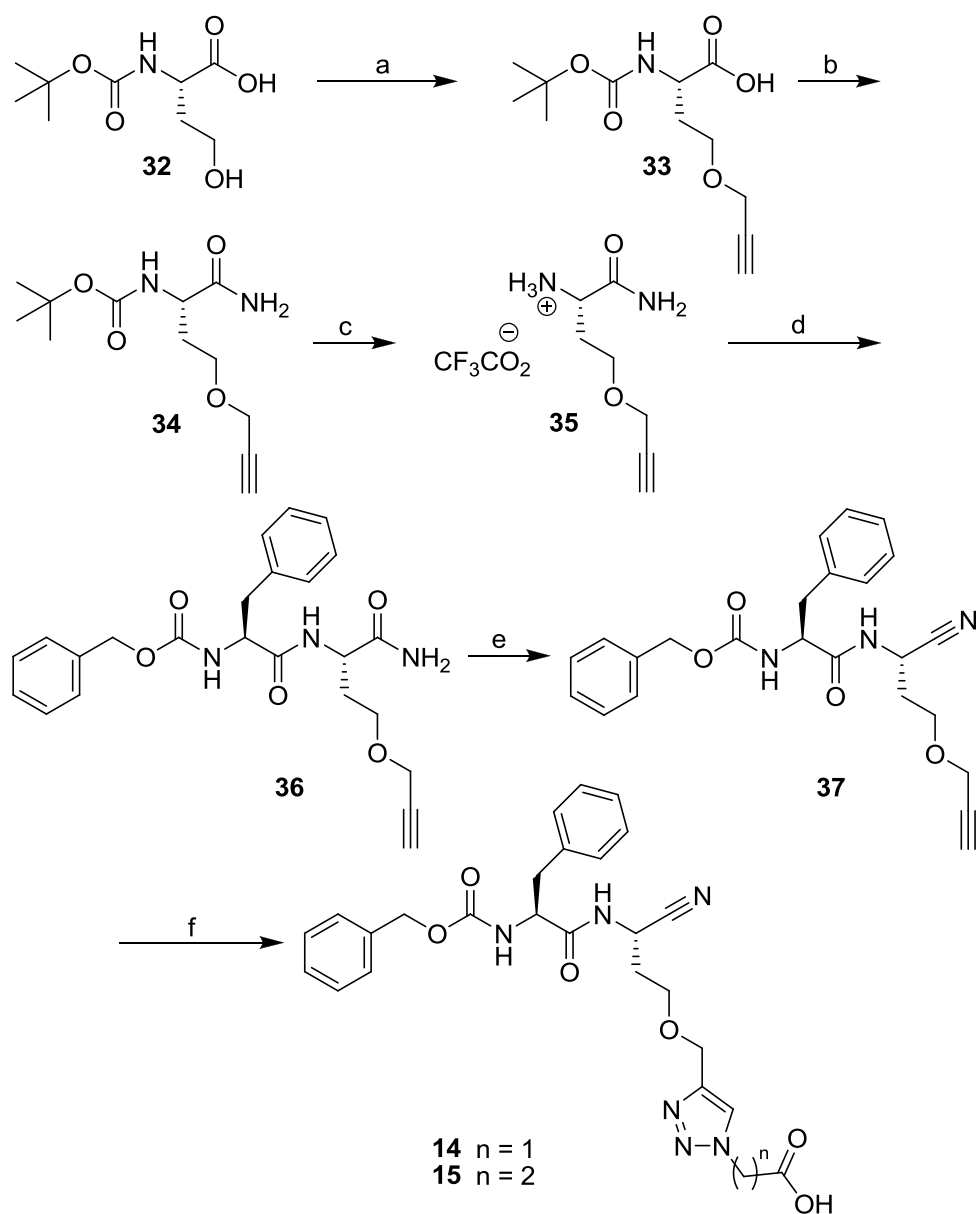

<sup>a</sup> Reagents and conditions: (a) NaH, propargyl bromide, THF, DMSO, -40 °C to rt; (b) 1. *N*-methylmorpholine, ClCO<sub>2</sub>*i*-Bu, THF, -25 °C, 2. aqueous ammonia (25%), -25 °C to rt; (c) trifluoroacetic acid, CH<sub>2</sub>Cl<sub>2</sub>, 0 °C to rt; (d) *Z*-Phe-OH, DIPEA, HATU, CH<sub>2</sub>Cl<sub>2</sub>, rt; (e) cyanuric chloride, DMF, rt; (f) **30** or **31**, CuSO<sub>4</sub> × 5 H<sub>2</sub>O, sodium ascorbate, DMSO, H<sub>2</sub>O, rt.

**Scheme S4. Synthesis of Dipeptide Nitriles 16 and 17<sup>a</sup>**

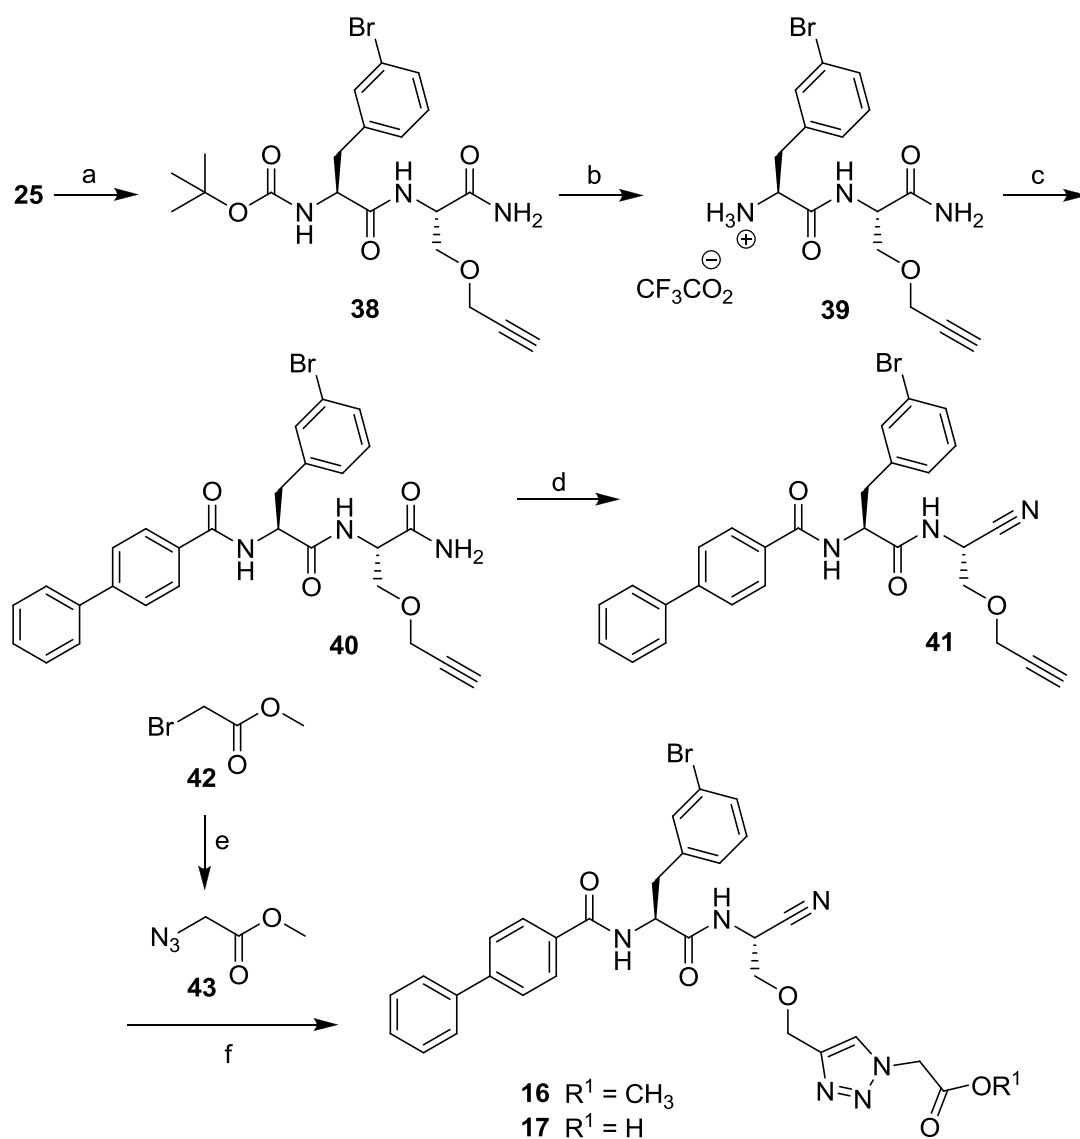

<sup>a</sup> Reagents and conditions: (a) **21**, DIPEA, HATU, CH<sub>2</sub>Cl<sub>2</sub>, rt; (b) trifluoroacetic acid, CH<sub>2</sub>Cl<sub>2</sub>, 0 °C to rt; (c) biphenyl-4-carboxylic acid, DIPEA, HATU, CH<sub>2</sub>Cl<sub>2</sub>, rt; (d) cyanuric chloride, DMF, rt; (e) NaN<sub>3</sub>, DMF, rt; (f) **43** or **30**, CuSO<sub>4</sub> × 5 H<sub>2</sub>O, sodium ascorbate, DMSO, H<sub>2</sub>O, rt.



**Scheme S5. Synthesis of Dipeptide Nitriles 18 and 19<sup>a</sup>**

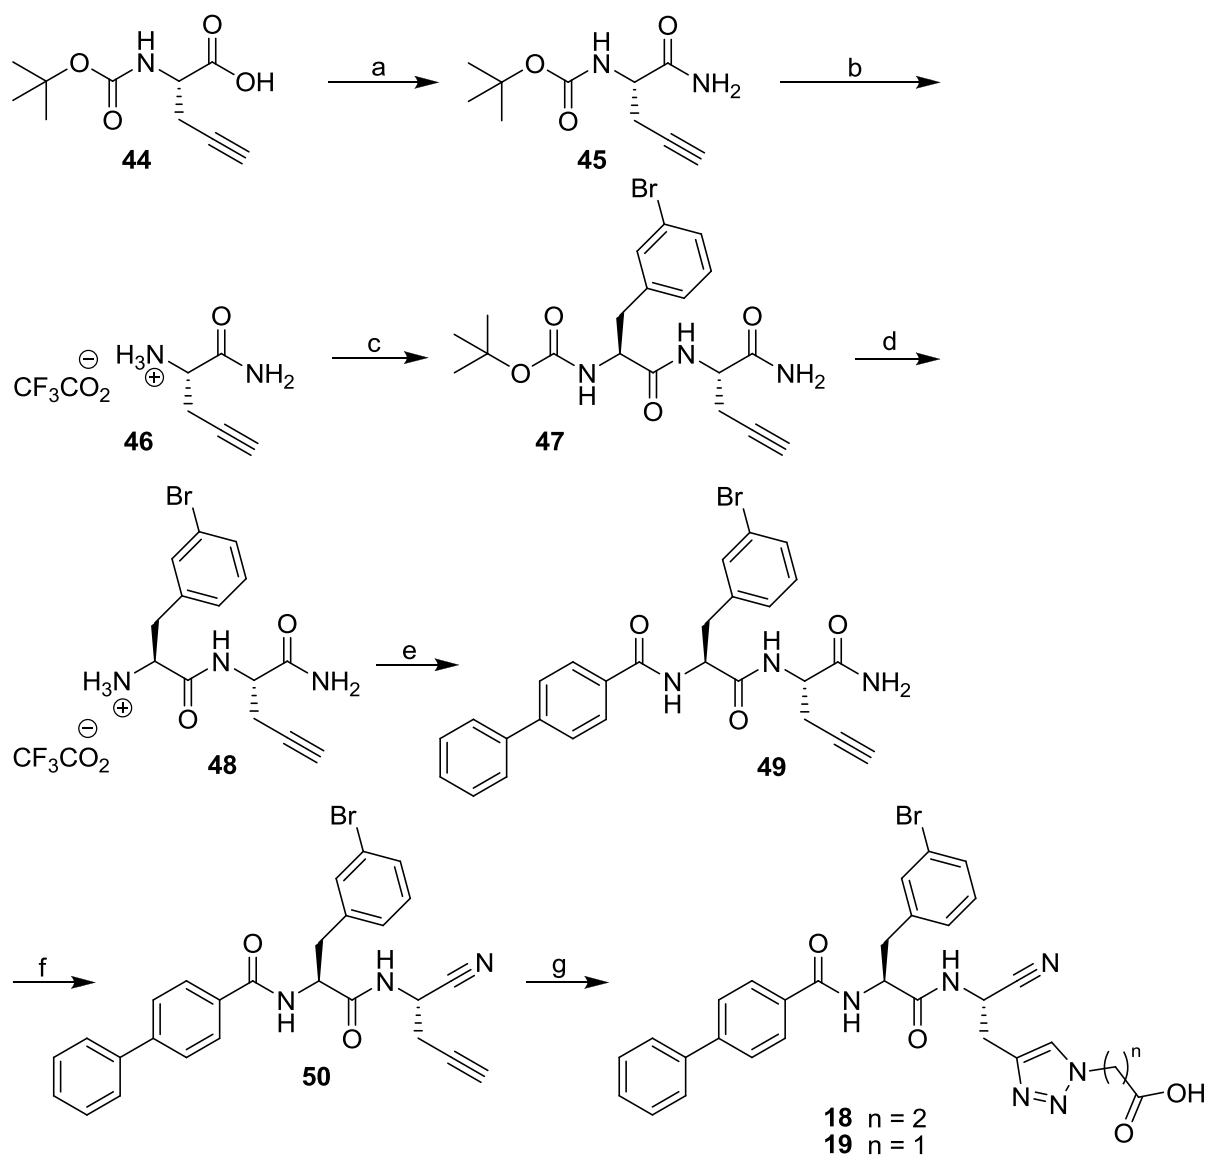

<sup>a</sup> Reagents and conditions: (a) 1. *N*-methylmorpholine, ClCO<sub>2</sub>*i*-Bu, THF, -25 °C, 2. aqueous ammonia (25%), -25 °C to rt; (b) trifluoroacetic acid, CH<sub>2</sub>Cl<sub>2</sub>, 0 °C to rt; (c) **21**, DIPEA, HATU, CH<sub>2</sub>Cl<sub>2</sub>, rt; (d) trifluoroacetic acid, CH<sub>2</sub>Cl<sub>2</sub>, 0 °C to rt; (e) biphenyl-4-carboxylic acid, DIPEA, HATU, CH<sub>2</sub>Cl<sub>2</sub>, rt; (f) cyanuric chloride, DMF, rt; (g) **31** or **30**, CuSO<sub>4</sub> × 5 H<sub>2</sub>O, sodium ascorbate, DMSO, H<sub>2</sub>O, rt.

## General Methods and Materials

Reagents and solvents were obtained from abcr GmbH (Karlsruhe, Germany), Acros (Geel, Belgium), Alfa Aesar (Karlsruhe, Germany), Bachem AG (Bubendorf, Switzerland), Calbiochem (Darmstadt, Germany), Enzo Life Sciences (Lörrach, Germany), Fluorochem Ltd (Hadfield, United Kingdom), Merck (Darmstadt, Germany), Sigma-Aldrich (Steinheim, Germany), and TCI Deutschland GmbH (Eschborn, Germany). Preparative column chromatography was performed on silica gel 60, 0.060–0.200 mm (Acros Organics). Mass spectra were recorded on an API 2000 mass spectrometer (electron spray ion source, Applied Biosystems, Darmstadt, Germany) coupled with an Agilent 1100 HPLC system using a Phenomenex Luna HPLC C18 column (50 × 2.00 mm, particle size 3 μm). The purity of the tested compounds was determined by HPLC-UV obtained on an LC-MS instrument (Applied Biosystems API 2000 LC-MS/MS, HPLC Agilent 1100) using the procedure as follows: dissolving of the compounds at a concentration of 1.0 mg/mL in MeOH. Then, 10 μL of the substance solution was injected into a Phenomenex Luna C18 HPLC column (50 × 2.00 mm, particle size 3 μm) and elution performed with a gradient of water/MeOH containing 2 mM ammonium acetate from 90:10 in 10 min up to 0:100 to 20 min at a flow rate of 250 μL/min. UV absorption was detected from 220 to 400 nm using a diode array detector. All tested compounds possessed a purity of not less than 95%. <sup>1</sup>H and broadband, proton decoupled <sup>13</sup>C NMR spectra were recorded on a Bruker Avance 500 MHz NMR spectrometer with DMSO-d<sub>6</sub> as solvent. NMR spectra were recorded at room temperature. Chemical shifts are given in parts per million (ppm) relative to the remaining protons of the deuterated solvent used as internal standard. Coupling constants *J* are given in Hertz, and spin multiplicities are given as s (singlet), d (doublet), t (triplet), and m (multiplet). Melting points were determined on a Büchi 510 oil bath apparatus and were uncorrected. Compounds **1-8** and **51-99** were prepared as described.<sup>1-5</sup>

## Synthetic Procedures

**(S)-N-(tert-Butyloxycarbonyl)-2-naphthylalanyl-glycine nitrile (1).** (S)-N-(tert-Butyloxycarbonyl)-2'-naphthylalanine (**20**, 0.32 g, 1.00 mmol) was dissolved in dry THF (10 mL) and cooled at -25 °C. To the stirred solution, N-methylmorpholine (0.10 g, 1.00 mmol) and isobutyl chloroformate (0.14 g, 1.00 mmol) were added consecutively, followed by aminoacetonitrile monosulfate (0.15 g, 1.00 mmol) dissolved in 2 N NaOH (0.50 mL, 1.00 mmol). The mixture was allowed to warm up to rt within 30 min and stirred overnight at rt. After evaporation of the solvent, the residue was extracted with ethyl acetate (3 × 30 mL). The combined organic layers were washed with 10% KHSO<sub>4</sub> (30 mL), H<sub>2</sub>O (30 mL), sat. NaHCO<sub>3</sub> (2 × 30 mL), H<sub>2</sub>O (30 mL) and brine (30 mL). The solvent was dried (Na<sub>2</sub>SO<sub>4</sub>) and evaporated. The crude product was purified by column chromatography using ethyl acetate/petroleum ether (1:1) to obtain **1** as a colorless solid (0.19 g, 54%); mp 144–146 °C, lit.<sup>4</sup> mp 147 °C; <sup>1</sup>H NMR (500 MHz, DMSO-*d*<sub>6</sub>) δ 1.24 (s, 9H), 2.93 (dd, 1H, *J* = 13.6 Hz, *J* = 10.1 Hz), 3.14 (dd, 1H, *J* = 13.7 Hz, *J* = 4.6 Hz), 4.13 (d, 2H, *J* = 5.7 Hz), 4.24-4.29 (m, 1H), 7.08 (d, 1H, *J* = 8.5 Hz), 7.41-7.49 (m, 3H), 7.72 (s, 1H), 7.81 (t, 2H, *J* = 6.8 Hz), 7.85 (d, 1H, *J* = 7.6 Hz), 8.65 (t, 1H, *J* = 5.5 Hz); <sup>13</sup>C NMR (125 MHz, DMSO-*d*<sub>6</sub>) δ 27.28, 28.18, 37.51, 55.66, 78.29, 117.60, 125.53, 126.06, 127.48, 127.57, 127.57, 127.62, 127.85, 131.98, 133.09, 135.70, 155.38, 172.44; LC-MS (ESI) (90% H<sub>2</sub>O to 100% MeOH in 10 min, then 100% MeOH to 20 min, DAD 220-400 nm), *m/z* = 354 ([M + H]<sup>+</sup>), 97% purity.

**(S)-N-(tert-Butyloxycarbonyl)-3-bromophenylalanyl-glycine nitrile (2).** (S)-N-(tert-Butyloxycarbonyl)-3-bromophenylalanine (**21**, 0.34 g, 1.00 mmol) was coupled with aminoacetonitrile monosulfate (0.15 g, 1.00 mmol) following the procedure noted above. The crude product was recrystallized from ethyl acetate to obtain **2** as a colorless solid (0.18 g, 47%); mp 135–136 °C, lit.<sup>4</sup> mp 139 °C; <sup>1</sup>H NMR (500 MHz, DMSO-*d*<sub>6</sub>) δ 1.29 (s, 9H), 2.73 (dd, 1H, *J* = 13.6 Hz, *J* = 10.7 Hz), 2.97 (dd, 1H, *J* = 13.6 Hz, *J* = 4.1 Hz), 4.12-4.17 (m, 3H), 7.09 (d, 1H, *J* = 8.9 Hz), 7.21-7.26 (m, 2H), 7.38 (d, 1H, *J* = 7.3 Hz), 7.47 (s, 1H), 8.64 (t, 1H, *J* = 5.4 Hz); <sup>13</sup>C NMR (125 MHz, DMSO-*d*<sub>6</sub>) δ 27.28, 28.21, 36.80, 55.43, 78.36, 117.60, 121.49, 128.47, 129.29, 130.31, 132.05, 141.01, 155.41, 172.20; LC-MS (ESI) (90% H<sub>2</sub>O to 100% MeOH in 10 min, then 100% MeOH to 20 min, DAD 220-400 nm), *m/z* = 382 and 384 ([M + H]<sup>+</sup>), 98% purity.

**(S)-N-(4-Phenylbenzoyl)-2-naphthylalanyl-glycine nitrile (9).** Compound **1** (0.19 g, 0.54 mmol) was dissolved in dry THF (10 mL). Under ice cooling, methanesulfonic acid (0.31 g, 3.24 mmol) was added. The resulting mixture was stirred at rt overnight. The solvent was evaporated and the crude product, 2-naphthylalanyl-glycine nitrile methanesulfonate, was used without further purification. Biphenyl-4-carboxylic acid (0.10 g, 0.50 mmol) was dissolved in dry CH<sub>2</sub>Cl<sub>2</sub> (15 mL). DIPEA (0.52 g, 4.00 mmol) and HATU (0.19 g, 0.50 mmol) were added and stirred for 10 min at rt. 2-Naphthylalanyl-glycine nitrile methanesulfonate (0.17 g, 0.50 mmol) was dissolved in dry CH<sub>2</sub>Cl<sub>2</sub> (5 mL) and added to the reaction mixture. It was stirred overnight at rt. The solvent was evaporated under reduced pressure and the resulting residue was suspended in ethyl acetate (30 mL). The organic layer was washed with 10% KHSO<sub>4</sub> (20 mL), H<sub>2</sub>O (20 mL), sat. NaHCO<sub>3</sub> (20 mL), H<sub>2</sub>O (20 mL) and brine (20 mL). The solvent was dried over Na<sub>2</sub>SO<sub>4</sub> and evaporated. The crude product was purified by column chromatography using ethyl acetate to obtain **9** as a colorless solid (0.15 g, 64% over two steps); mp 217–218 °C; <sup>1</sup>H NMR (500 MHz, DMSO-*d*<sub>6</sub>) δ 3.20 (dd, 1H), 4.14-4.21 (m, 2H), 4.82-4.85 (m, 1H), 7.38-7.48 (m, 5H), 7.51 (d, 1H, *J* = 7.1 Hz), 7.69-7.73 (m, 4H), 7.79-7.83 (m, 4H), 7.89 (d, 2H, *J* = 7.1 Hz), 8.79-8.82 (m, 2H); <sup>13</sup>C NMR (125 MHz, DMSO-*d*<sub>6</sub>) δ 27.41, 37.21, 54.89, 117.68, 125.59, 126.14, 126.52, 127.00, 127.50, 127.57, 127.61, 127.69, 127.88, 128.21, 128.30, 129.16, 131.97, 132.75, 133.12, 135.99, 139.27, 143.06, 166.18, 172.16; LC-MS (ESI) (90% H<sub>2</sub>O to 100% MeOH in 10 min, then 100% MeOH to 20 min, DAD 220-400 nm), *m/z* = 434 ([M + H]<sup>+</sup>), 98% purity. QTOF: HRMS (ESI): *m/z* [M + H]<sup>+</sup> calcd. for C<sub>28</sub>H<sub>23</sub>N<sub>3</sub>O<sub>2</sub>: 434.1863, found: 434.1852.

**(S)-N-(4-Phenylbenzoyl)-3-bromophenylalanyl-glycine nitrile (10).** Compound **2** (0.21 g, 0.54 mmol), dissolved in dry THF (7.3 mL) was deprotected with methanesulfonic acid (0.31 g, 3.24 mmol) and the crude product, 3-bromophenylalanyl-glycine nitrile methanesulfonate, was coupled with biphenyl-4-carboxylic acid following the procedure noted above. The crude product was recrystallized from ethyl acetate to obtain **10** as a colorless solid (0.17 g, 68% over two steps); mp 216–217 °C; <sup>1</sup>H NMR (500 MHz, DMSO-*d*<sub>6</sub>) δ 3.02 (dd, 1H, *J* = 13.7 Hz, *J* = 10.9 Hz), 3.14 (dd, 1H, *J* = 13.9 Hz, *J* = 4.1 Hz), 4.16-4.19 (m, 2H), 4.70-4.74 (m, 1H), 7.22 (t, 1H, *J* = 7.7 Hz), 7.33-7.37 (m, 2H), 7.38-7.41 (m, 1H), 7.47-7.50 (m, 2H), 7.58 (t, 1H, *J* = 1.6 Hz), 7.71-7.73 (m, 2H), 7.75-7.76 (m, 2H), 7.89-7.92 (m, 2H), 8.75 (d, 1H, *J* = 8.5 Hz), 8.80 (t, 1H, *J* = 5.5 Hz); <sup>13</sup>C NMR (125 MHz, DMSO-*d*<sub>6</sub>) δ 27.36, 36.48, 54.57, 117.63, 121.54, 126.52, 127.00, 128.20, 128.28, 128.38, 129.15, 129.36, 130.36, 132.07, 132.72, 139.25, 141.20, 143.08, 166.22, 171.91; LC-MS (ESI) (90% H<sub>2</sub>O to 100% MeOH in

10 min, then 100% MeOH to 20 min, DAD 220-400 nm),  $m/z = 462$  and  $464$  ( $[M + H]^+$ ), 98% purity. QTOF: HRMS (ESI):  $m/z [M - H]^-$  calcd. for  $C_{24}H_{20}BrN_3O_2$ : 460.0666 and 462.0646, found: 460.0666 and 462.0647. HRMS (ESI):  $m/z [M + H]^+$  calcd. for  $C_{24}H_{20}BrN_3O_2$ : 462.0812 and 464.0791, found: 462.0803 and 464.0789.

**(S)-N-(4-Phenylbenzoyl)-3-biphenylalanyl-glycine nitrile (11).** Compound **10** (46.0 mg, 0.10 mmol), phenylboronic acid (18.0 mg, 0.15 mmol), and  $K_2CO_3$  (30.0 mg, 0.22 mmol) were dissolved in dimethoxyethane (5 mL) and  $H_2O$  (2 mL).  $Pd(PPh_3)_4$  (12.0 mg, 0.01 mmol) was added. The resulting mixture was placed into a microwave reactor (sealed tube) and irradiated for 60 min at 40 W and 70 °C. The reaction mixture was transferred into a round-bottom flask and evaporated. The residue was suspended in  $H_2O$  (20 mL). The aqueous suspension was extracted with ethyl acetate ( $3 \times 20$  mL). The combined organic layers were washed with 10%  $KHSO_4$  ( $2 \times 20$  mL),  $H_2O$  (30 mL), sat.  $NaHCO_3$  ( $2 \times 20$  mL),  $H_2O$  (20 mL) and brine (20 mL). The solvent was dried ( $Na_2SO_4$ ) and evaporated. The crude product was purified by column chromatography using ethyl acetate/petroleum ether (1:1) to obtain **11** as a colorless solid (27.0 mg, 59%); mp 215–216 °C;  $^1H$  NMR (500 MHz,  $DMSO-d_6$ )  $\delta$  3.11 (dd, 1H,  $J = 11.4$  Hz,  $J = 9.1$  Hz), 3.23 (dd, 1H,  $J = 11.4$  Hz,  $J = 3.5$  Hz), 4.15-4.23 (m, 2H), 4.77-4.81 (m, 1H), 7.31-7.36 (m, 3H), 7.38-7.43 (m, 3H), 7.45-7.49 (m, 3H), 7.58 (d, 2H,  $J = 6.0$  Hz), 7.65 (s, 1H), 7.70-7.74 (m, 4H), 7.93 (d, 2H,  $J = 7.0$  Hz), 8.79 (d, 1H,  $J = 6.9$  Hz), 8.82 (t, 1H,  $J = 4.7$  Hz);  $^{13}C$  NMR (125 MHz,  $DMSO-d_6$ )  $\delta$  27.40, 36.97, 54.86, 117.69, 124.87, 126.49, 126.79, 127.00, 127.49, 127.81, 128.21, 128.33, 128.38, 128.86, 128.96, 129.16, 132.77, 138.98, 139.28, 140.15, 140.37, 143.08, 166.20, 172.20; LC-MS (ESI) (90%  $H_2O$  to 100% MeOH in 10 min, then 100% MeOH to 20 min, DAD 220-400 nm),  $m/z = 460$  ( $[M + H]^+$ ), 97% purity. QTOF: HRMS (ESI):  $m/z [M + H]^+$  calcd. for  $C_{30}H_{25}N_3O_2$ : 460.2020, found: 460.2015.

**(S)-N-(tert-Butyloxycarbonyl)-O-(propynyl)-serine amide (24).** *(S)-N-(tert-Butyloxycarbonyl)-serine (22*, 2.05 g, 10.0 mmol) was dissolved dry DMF (30 mL). Under ice cooling, sodium hydride (60%, 0.97 g, 24.0 mmol) was added slowly and stirred for 30 min. Then, the reaction mixture was treated with propargyl bromide (80%, 2.09 g, 14.0 mmol) and stirred for 4 h at rt. After evaporation of the solvent, the residue was suspended in 10%  $KHSO_4$  (50 mL). The aqueous suspension was extracted with ethyl acetate ( $3 \times 30$  mL). The combined organic layers were washed with 10%  $KHSO_4$  (30 mL) and brine (30 mL). The solvent was dried over  $Na_2SO_4$  and evaporated. The crude product, *(S)-N-(tert-*

butyloxycarbonyl)-*O*-(propynyl)-serine (**23**), was used without further purification as brown oil. Compound **23** (1.46 g, 6.00 mmol) was dissolved in dry THF (30 mL) and cooled at -25 °C. To the stirred solution, *N*-methylmorpholine (0.61 g, 6.00 mmol) and isobutyl chloroformate (0.82 g, 6.00 mmol) were added consecutively. Conc'd aqueous ammonia solution (25%, 2.25 mL, 30.0 mmol) was given to the reaction mixture when the precipitation of *N*-methylmorpholine hydrochloride occurred. It was allowed to warm to rt within 30 min and stirred for 6 h at rt. After evaporation of the solvent the resulting aqueous residue was extracted with ethyl acetate (3 × 30 mL). The combined organic layers were washed with 10% KHSO<sub>4</sub> (30 mL), H<sub>2</sub>O (30 mL), sat. NaHCO<sub>3</sub> (30 mL), H<sub>2</sub>O (30 mL) and brine (30 mL). The solvent was dried over Na<sub>2</sub>SO<sub>4</sub> and evaporated. The crude product was purified by column chromatography using ethyl acetate/petroleum ether 1:1 to obtain **24** as a colorless oil (0.81 g, 33% over two steps); <sup>1</sup>H NMR (500 MHz, DMSO-*d*<sub>6</sub>) δ 1.37 (s, 9H), 3.41 (t, 1H, *J* = 2.4 Hz), 3.53 (dd, 1H, *J* = 9.6 Hz, *J* = 6.8 Hz), 3.59 (dd, 1H, *J* = 9.6 Hz, *J* = 4.9 Hz), 4.04-4.08 (m, 1H), 4.12 (t, 2H, *J* = 2.1 Hz), 6.65 (d, 1H, *J* = 8.2 Hz), 7.06 (s, 1H), 7.29 (s, 1H); <sup>13</sup>C NMR (125 MHz, DMSO-*d*<sub>6</sub>) δ 28.28, 54.15, 57.73, 69.59, 77.45, 78.34, 80.13, 155.23, 171.72; LC-MS (ESI) (90% H<sub>2</sub>O to 100% MeOH in 10 min, then 100% MeOH to 20 min, DAD 220-400 nm), *m/z* = 243 ([M + H]<sup>+</sup>), 100% purity.

**(*S,S*)-*N*-(Benzyloxycarbonyl)-phenylalanyl-*O*-(propynyl)-serine amide (26).** Compound **24** (0.48 g, 2.00 mmol) was dissolved in trifluoroacetic acid/CH<sub>2</sub>Cl<sub>2</sub> (1:1, 30 mL) and stirred for 3 h at 0 °C. The solvent was evaporated under reduced pressure to obtain (*S*)-*O*-(propynyl)-serine amide trifluoroacetate (**25**) as an oily residue. Compound **25** (0.51 g, 2.00 mmol) was dissolved in dry THF (15 mL) and cooled at -25 °C. To the stirred solution, *N*-methylmorpholine (0.20 g, 2.00 mmol) and isobutyl chloroformate (0.27 g, 2.00 mmol) were added consecutively. (*S*)-*N*-(Benzyloxycarbonyl)-phenylalanine (0.60 g, 2.00 mmol) was dissolved in 2N NaOH (5.00 mL, 10.0 mmol) and the resulting solution was given to the reaction mixture when the precipitation of *N*-methylmorpholine hydrochloride occurred. It was allowed to warm to rt within 30 min and stirred overnight at rt. After evaporation of the solvent, the resulting aqueous residue was extracted with ethyl acetate (3 × 30 mL). The combined organic layers were washed with 10% KHSO<sub>4</sub> (30 mL), H<sub>2</sub>O (30 mL), sat. NaHCO<sub>3</sub> (30 mL), H<sub>2</sub>O (30 mL) and brine (30 mL). The solvent was dried over Na<sub>2</sub>SO<sub>4</sub> and evaporated. The crude product was recrystallized from ethyl acetate to obtain **26** as a colorless solid (0.18 g, 21%). mp 198–200 °C; <sup>1</sup>H NMR (500 MHz, DMSO-*d*<sub>6</sub>) δ 2.73 (dd, 1H, *J* = 13.7 Hz, *J* = 10.9 Hz), 3.03 (dd, 1H, *J* = 13.9 Hz, *J* = 3.8 Hz), 3.43 (t, 1H, *J* = 2.4 Hz), 3.60 (dd,

1H,  $J = 9.6$  Hz,  $J = 5.2$  Hz), 3.66 (dd, 1H,  $J = 9.8$  Hz,  $J = 5.7$  Hz), 4.15 (s, 2H), 4.29–4.33 (m, 1H), 4.38–4.42 (m, 1H), 4.94 (s, 2H), 7.13 (s, 1H), 7.17–7.33 (m, 11H), 7.50 (d, 1H,  $J = 8.6$  Hz), 8.06 (d, 1H,  $J = 8.2$  Hz);  $^{13}\text{C}$  NMR (125 MHz, DMSO- $d_6$ )  $\delta$  37.48, 52.57, 56.26, 57.91, 65.36, 69.54, 77.58, 80.08, 126.34, 127.50, 127.77, 128.14, 128.41, 129.35, 137.12, 138.19, 155.97, 171.10, 171.56; LC-MS (ESI) (90% H<sub>2</sub>O to 100% MeOH in 10 min, then 100% MeOH to 20 min, DAD 220–400 nm),  $m/z = 424$  ( $[\text{M} + \text{H}]^+$ ), 100% purity.

**(*S,S*)-*N*-(Benzyloxycarbonyl)-phenylalanyl-*O*-(propynyl)-serine nitrile (27).** Compound **26** (0.42 g, 1.00 mmol) was dissolved in dry DMF (15 mL). Cyanuric chloride (0.18 g, 1.00 mmol) was added and the mixture was stirred for 14 h at rt. The solvent was evaporated under reduced pressure. The resulting solid was treated with 10% NaHCO<sub>3</sub> (20 mL) and stirred for 10 min at rt. The aqueous suspension was extracted with ethyl acetate (3  $\times$  30 mL). The combined organic layers were washed with 10% KHSO<sub>4</sub> (30 mL), H<sub>2</sub>O (30 mL), sat. NaHCO<sub>3</sub> (30 mL), H<sub>2</sub>O (30 mL) and brine (30 mL). The solvent was dried over Na<sub>2</sub>SO<sub>4</sub> and evaporated. The crude colorless solid **27** was used without further purification (0.36 g, 89%); mp 130–131 °C;  $^1\text{H}$  NMR (500 MHz, DMSO- $d_6$ )  $\delta$  2.76 (dd, 1H,  $J = 13.6$  Hz,  $J = 10.4$  Hz), 2.96 (dd, 1H,  $J = 13.7$  Hz,  $J = 4.6$  Hz), 3.52 (t, 1H,  $J = 2.4$  Hz), 3.68 (d, 2H,  $J = 5.7$  Hz), 4.22–4.31 (m, 3H), 4.99–5.03 (m, 1H), 4.91–4.97 (m, 2H), 7.18–7.33 (m, 10H), 7.56 (d, 1H,  $J = 8.5$  Hz), 8.94 (d, 1H,  $J = 7.9$  Hz);  $^{13}\text{C}$  NMR (125 MHz, DMSO- $d_6$ )  $\delta$  37.37, 40.53, 55.97, 58.16, 65.42, 67.94, 78.18, 79.60, 117.97, 126.49, 127.58, 127.82, 128.20, 128.41, 129.34, 137.07, 137.76, 155.94, 171.93; LC-MS (ESI) (90% H<sub>2</sub>O to 100% MeOH in 10 min, then 100% MeOH to 20 min, DAD 220–400 nm),  $m/z = 406$  ( $[\text{M} + \text{H}]^+$ ), 82% purity.

**(*S,S*)-*N*-(Benzyloxycarbonyl)-phenylalanyl-*O*-((1-(carboxymethyl)-1*H*-1,2,3-triazol-4-yl)methyl)-serine nitrile (12).** Bromoacetic acid (**28**, 0.69 g, 5.00 mmol) was dissolved in H<sub>2</sub>O (10 mL). Sodium azide (0.65 g, 10.00 mmol) was added and it was stirred overnight. The reaction mixture was acidified with concd HCl to pH = 1 and extracted with diethyl ether (3  $\times$  30 mL). The combined organic layers were washed with brine (30 mL). The solvent was dried over Na<sub>2</sub>SO<sub>4</sub> and evaporated at 25 °C to obtain azidoacetic acid (**30**) as a colorless oil, which was used without further purification (0.51 g, quantitative yield). Compound **27** (0.20 g, 0.50 mmol) and 2-azidoacetic acid (**30**, 51.0 mg, 0.50 mmol) were dissolved in DMSO/H<sub>2</sub>O (2:1, 15 mL). Sodium ascorbate (0.10 g, 0.50 mmol) and copper(II) sulfate pentahydrate (62.0 mg, 0.25 mmol) were added and the reaction mixture was stirred overnight at rt. Then, 10% KHSO<sub>4</sub> solution (50 mL) was added and the aqueous suspension was extracted with ethyl

acetate (3 × 30 mL). The combined organic layers were washed with 10% KHSO<sub>4</sub> (20 mL), H<sub>2</sub>O (20 mL) and brine (20 mL). The solvent was dried over Na<sub>2</sub>SO<sub>4</sub> and evaporated. The crude product was purified by column chromatography using ethyl acetate/MeOH/acetic acid (89:10:1) to obtain **12** as colorless solid (90.0 mg, 36%). mp 183–184 °C; <sup>1</sup>H NMR (500 MHz, DMSO-*d*<sub>6</sub>) δ 2.76 (dd, 1H, *J* = 13.6 Hz, *J* = 10.4 Hz), 2.95 (dd, 1H, *J* = 13.9 Hz, *J* = 4.4 Hz), 3.70 (d, 2H, *J* = 6.0 Hz), 4.26-4.31 (m, 1H), 4.66 (s, 2H), 4.90-4.97 (m, 2H), 4.98-5.02 (m, 1H), 5.25 (s, 2H), 7.18-7.33 (m, 10H), 7.58 (d, 1H, *J* = 8.2 Hz), 8.10 (s, 1H), 8.98 (d, 1H, *J* = 7.6 Hz); <sup>13</sup>C NMR (125 MHz, DMSO-*d*<sub>6</sub>) δ 37.38, 40.66, 50.71, 56.02, 63.97, 65.45, 68.40, 118.10, 125.74, 126.51, 127.61, 127.85, 128.23, 128.44, 129.37, 137.09, 137.81, 143.27, 156.00, 168.69, 171.97; LC-MS (ESI) (90% H<sub>2</sub>O to 100% MeOH in 10 min, then 100% MeOH to 20 min, DAD 220-400 nm), *m/z* = 507 ([M + H]<sup>+</sup>), 95% purity. QTOF: HRMS (ESI): *m/z* [M + H]<sup>+</sup> calcd. for C<sub>25</sub>H<sub>26</sub>N<sub>6</sub>O<sub>6</sub>: 507.1987, found: 507.1988.

**(*S,S*)-*N*-(Benzyloxycarbonyl)-phenylalanyl-*O*-((1-(2-carboxyethyl)-1*H*-1,2,3-triazol-4-yl)methyl)-serine nitrile (**13**)**. 3-Bromopropionic acid (**29**, 0.76 g, 5.00 mmol) was dissolved in H<sub>2</sub>O (10 mL). Sodium azide (0.65 g, 10.00 mmol) was added and stirred overnight. The reaction mixture was acidified with concd HCl to pH = 1 and extracted with diethyl ether (3 × 30 mL). The combined organic layers were washed with brine (30 mL). The solvent was dried over Na<sub>2</sub>SO<sub>4</sub> and evaporated at 25 °C to obtain 3-azidopropanoic acid (**31**) as light yellow oil, which was used without further purification (0.58 g, quantitative yield). Compound **27** (0.13 g, 0.32 mmol) and 3-azidopropanoic acid (**31**, 37.0 mg, 0.32 mmol) were dissolved in DMSO/H<sub>2</sub>O (2:1, 12 mL). Sodium ascorbate (63.0 mg, 0.32 mmol) and copper(II) sulfate pentahydrate (40.0 mg, 0.16 mmol) were added and the reaction mixture was stirred overnight at rt. Then, 10% KHSO<sub>4</sub> solution (50 mL) was added and the aqueous suspension was extracted with ethyl acetate (3 × 30 mL). The combined organic layers were washed with 10% KHSO<sub>4</sub> (20 mL), H<sub>2</sub>O (20 mL) and brine (20 mL). The solvent was dried over Na<sub>2</sub>SO<sub>4</sub> and evaporated. The crude product was purified by column chromatography using ethyl acetate/acetic acid (99:1) to obtain **13** as a colorless solid (61.0 mg, 36%). mp 80–82 °C; <sup>1</sup>H NMR (500 MHz, DMSO-*d*<sub>6</sub>) δ 2.75 (dd, 1H, *J* = 13.6 Hz, *J* = 10.4 Hz), 2.85 (t, 2H, *J* = 13.6 Hz), 2.95 (dd, 1H, *J* = 13.7 Hz, *J* = 4.3 Hz), 3.68 (d, 2H, *J* = 5.7 Hz), 4.25-4.30 (m, 1H), 4.53 (t, 2H, *J* = 6.8 Hz), 4.63 (s, 2H), 4.90-4.96 (m, 2H), 4.97-5.01 (m, 1H), 7.18-7.33 (m, 10H), 7.63 (d, 1H, *J* = 7.9 Hz), 8.10 (s, 1H), 8.99 (d, 1H, *J* = 7.8 Hz); <sup>13</sup>C NMR (125 MHz, DMSO-*d*<sub>6</sub>) δ 34.44, 37.37, 40.63, 45.63, 56.01, 63.96, 65.43, 68.31, 118.07, 124.49, 126.48, 127.58, 127.82, 128.21, 128.41, 129.34, 137.08, 137.79, 143.20, 155.98, 171.94; LC-MS (ESI) (90%



H<sub>2</sub>O to 100% MeOH in 10 min, then 100% MeOH to 20 min, DAD 220-400 nm),  $m/z = 521$  ( $[M + H]^+$ ), 97% purity. QTOF: HRMS (ESI):  $m/z [M + H]^+$  calcd. for C<sub>26</sub>H<sub>28</sub>N<sub>6</sub>O<sub>6</sub>: 521.2143, found: 521.2167.

**(S)-N-(tert-Butyloxycarbonyl)-O-(propynyl)-homoserine amide (34).** *(S)-N-(tert-Butyloxycarbonyl)-homoserine (32*, 1.21 g, 5.50 mmol) was dissolved dry THF/DMSO (1:4, 25 mL). Under cooling to -50 °C, sodium hydride (60%, 0.75 g, 18.7 mmol) was added slowly and it was stirred for 30 min. Then, the reaction mixture was treated with propargyl bromide (80%, 1.64 g, 10.0 mmol) and stirred for 60 min at -40 °C. It was allowed to warm to rt within 60 min and stirred for 20 h at rt. After evaporation of the solvent, the residue was suspended in 10% KHSO<sub>4</sub> (50 mL) and extracted with ethyl acetate (3 × 20 mL). The combined organic layers were washed with 10% KHSO<sub>4</sub> (30 mL) and brine (30 mL). The solvent was dried over Na<sub>2</sub>SO<sub>4</sub> and evaporated to obtain *(S)-N-(tert-butyloxycarbonyl)-O-(propynyl)-homoserine (33)* as brown oil without further purification. The crude product (1.42 g, 5.50 mmol) was dissolved in dry THF (40 mL) and cooled at -25 °C. To the stirred solution, *N*-methylmorpholine (0.56 g, 5.50 mmol) and isobutyl chloroformate (0.75 g, 5.50 mmol) were added consecutively. Conc'd aqueous ammonia solution (25%, 2.05 mL, 27.5 mmol) was given to the reaction mixture when the precipitation of *N*-methylmorpholine hydrochloride occurred. It was allowed to warm to rt within 30 min and stirred for 18 h at rt. After evaporation of the solvent, the resulting oily residue was suspended in ethyl acetate (70 mL). The organic layer was washed with 10% KHSO<sub>4</sub> (30 mL), H<sub>2</sub>O (30 mL), sat. NaHCO<sub>3</sub> (30 mL), H<sub>2</sub>O (30 mL) and brine (30 mL). The solvent was dried over Na<sub>2</sub>SO<sub>4</sub> and evaporated. The crude product was purified by column chromatography using ethyl acetate/petroleum ether 2:1 to obtain **34** as a colorless oil (0.94 g, 67% over two steps); <sup>1</sup>H NMR (500 MHz, DMSO-*d*<sub>6</sub>) δ 1.37 (s, 9H), 1.65-1.72 (m, 1H), 1.83-1.89 (m, 1H), 3.37 (s, 1H), 3.43 (t, 2H, *J* = 6.2 Hz), 3.88-3.93 (m, 1H), 4.08 (d, 2H, *J* = 1.3 Hz), 6.74 (d, 1H, *J* = 7.9 Hz), 6.92 (s, 1H), 7.19 (s, 1H); <sup>13</sup>C NMR (125 MHz, DMSO-*d*<sub>6</sub>) δ 28.33, 31.84, 51.54, 57.55, 66.27, 77.10, 78.13, 80.51, 155.42, 174.03; LC-MS (ESI) (90% H<sub>2</sub>O to 100% MeOH in 10 min, then 100% MeOH to 20 min, DAD 220-400 nm),  $m/z = 257$  ( $[M + H]^+$ ), 100% purity.

**(S,S)-N-(Benzyloxycarbonyl)-phenylalanyl-O-(propynyl)-homoserine amide (36).** Compound **34** (0.90 g, 3.50 mmol) was dissolved in dry CH<sub>2</sub>Cl<sub>2</sub> (20 mL) and cooled in an ice bath. Trifluoroacetic acid (20 mL) was added and the reaction mixture was stirred for 2 h. The solvent was evaporated under reduced pressure to obtain *(S)-O-(propynyl)-homoserine amide*

trifluoroacetate (**35**) as an oily residue. (*S*)-*N*-(Benzyloxycarbonyl)-phenylalanine (1.05 g, 3.50 mmol) was dissolved in dry CH<sub>2</sub>Cl<sub>2</sub> (20 mL). DIPEA (2.26 g, 17.5 mmol) and HATU (1.33 g, 3.50 mmol) were added and it was stirred for 10 min at rt. Compound **35** (0.95 g, 3.50 mmol) was dissolved in dry CH<sub>2</sub>Cl<sub>2</sub> (10 mL) and added to the reaction mixture. It was stirred overnight at rt. The solvent was evaporated under reduced pressure and the resulting residue was suspended in ethyl acetate. The organic layer was washed with 10% KHSO<sub>4</sub> (30 mL), H<sub>2</sub>O (30 mL), sat. NaHCO<sub>3</sub> (30 mL), H<sub>2</sub>O (30 mL) and brine (30 mL). The solvent was dried over Na<sub>2</sub>SO<sub>4</sub> and evaporated. The crude product was purified by column chromatography using ethyl acetate to obtain **36** as a light yellow solid (1.11 g, 72% over two steps); mp 140–141 °C; <sup>1</sup>H NMR (500 MHz, DMSO-*d*<sub>6</sub>) δ 1.71-1.78 (m, 1H), 1.88-1.98 (m, 1H), 2.75 (dd, 1H, *J* = 13.9 Hz, *J* = 10.7 Hz), 3.02 (dd, 1H, *J* = 13.9 Hz, *J* = 4.1 Hz), 3.36 (t, 1H, *J* = 2.4 Hz), 3.39-3.48 (m, 2H), 4.06 (t, 2H, *J* = 2.7 Hz), 4.24-4.29 (m, 2H), 4.94 (s, 2H), 7.03 (s, 1H), 7.23-7.34 (m, 11H), 7.49 (d, 1H, *J* = 8.5 Hz), 8.00 (d, 1H, *J* = 8.2 Hz); <sup>13</sup>C NMR (125 MHz, DMSO-*d*<sub>6</sub>) δ 32.04, 37.36, 49.91, 56.36, 57.57, 65.39, 66.15, 77.11, 80.51, 126.37, 127.57, 127.80, 128.17, 128.42, 129.32, 137.11, 138.19, 156.00, 171.44, 173.19; LC-MS (ESI) (90% H<sub>2</sub>O to 100% MeOH in 10 min, then 100% MeOH to 20 min, DAD 220-400 nm), *m/z* = 438 ([M + H]<sup>+</sup>), 91% purity.

**(*S,S*)-*N*-(Benzyloxycarbonyl)-phenylalanyl-*O*-(propynyl)-homoserine nitrile (**37**).** Compound **36** (0.66 g, 1.50 mmol) was dissolved in dry DMF (20 mL) and cyanuric chloride (0.28 g, 1.50 mmol) was added. The reaction mixture was stirred overnight at rt. Then, H<sub>2</sub>O (30 mL) was added and the aqueous suspension was extracted with ethyl acetate (4 × 30 mL). The combined organic layers were washed with H<sub>2</sub>O (20 mL) and brine (20 mL). The solvent was dried over Na<sub>2</sub>SO<sub>4</sub> and evaporated. The crude product was purified by column chromatography using ethyl acetate/ petroleum ether 3:1 to obtain **37** as colorless solid (0.47 g, 75%). mp = 141–142 °C; <sup>1</sup>H NMR (500 MHz, DMSO-*d*<sub>6</sub>) δ 1.95-2.01 (m, 1H), 2.03-2.09 (m, 1H), 2.79 (dd, 1H, *J* = 13.3 Hz, *J* = 10.4 Hz), 2.97 (dd, 1H, *J* = 13.7 Hz, *J* = 4.6 Hz), 3.41 (t, 1H, *J* = 1.9 Hz), 3.47-3.56 (m, 2H), 4.06-4.15 (m, 2H), 4.19-4.23 (m, 1H), 4.74-4.79 (m, 1H), 4.92-4.98 (m, 2H), 7.20-7.34 (m, 10H), 7.60 (d, 1H, *J* = 8.2 Hz), 8.78 (d, 1H, *J* = 7.6 Hz); <sup>13</sup>C NMR (125 MHz, DMSO-*d*<sub>6</sub>) δ 31.69, 37.36, 37.54, 56.15, 57.70, 64.81, 65.45, 77.43, 80.18, 119.01, 126.50, 127.61, 127.83, 128.24, 128.41, 129.29, 137.06, 137.75, 155.97, 171.68; LC-MS (ESI) (90% H<sub>2</sub>O to 100% MeOH in 10 min, then 100% MeOH to 20 min, DAD 220-400 nm), *m/z* = 420 ([M + H]<sup>+</sup>), 83% purity.

**(*S,S*)-*N*-(Benzyloxycarbonyl)-phenylalanyl-*O*-((1-(carboxymethyl)-1*H*-1,2,3-triazol-4-yl)-methyl)-homoserine nitrile (14).** Compound **37** (0.21 g, 0.50 mmol) and azidoacetic acid (**30**, 51.0 mg, 0.50 mmol) were dissolved in DMSO/H<sub>2</sub>O (2:1, 30 mL). Sodium ascorbate (0.10 g, 0.50 mmol) and copper(II) sulfate pentahydrate (62.0 mg, 0.25 mmol) were added and the reaction mixture was stirred overnight at rt. Then, 2N HCl solution (50 mL) was added and the aqueous suspension was extracted with ethyl acetate (4 × 30 mL). The combined organic layers were washed with brine (20 mL). The solvent was dried over Na<sub>2</sub>SO<sub>4</sub> and evaporated. The crude product was purified by column chromatography using ethyl acetate/MeOH/acetic acid (89:10:1) to obtain **14** as colorless solid (0.18 g, 69%). mp 159–160 °C; <sup>1</sup>H NMR (500 MHz, DMSO-*d*<sub>6</sub>) δ 1.95-2.07 (m, 2H), 2.78 (dd, 1H, *J* = 13.6 Hz, *J* = 10.1 Hz), 2.97 (dd, 1H, *J* = 13.7 Hz, *J* = 4.9 Hz), 3.49-3.53 (m, 2H), 4.19-4.24 (m, 1H), 4.50 (s, 2H), 4.74-4.79 (m, 1H), 4.91-4.98 (m, 2H), 5.09 (s, 2H), 7.18-7.32 (m, 10H), 7.62 (d, 1H, *J* = 8.2 Hz), 8.01 (s, 1H), 8.81 (d, 1H, *J* = 7.6 Hz); <sup>13</sup>C NMR (125 MHz, DMSO-*d*<sub>6</sub>) δ 31.82, 37.58, 40.61, 51.46, 56.21, 63.70, 65.12, 65.48, 119.12, 125.32, 126.52, 127.63, 127.83, 128.26, 128.42, 129.32, 137.07, 137.79, 143.64, 156.00, 168.61, 171.74; LC-MS (ESI) (90% H<sub>2</sub>O to 100% MeOH in 10 min, then 100% MeOH to 20 min, DAD 220-400 nm), *m/z* = 521 ([*M* + *H*]<sup>+</sup>), 94% purity. QTOF: HRMS (ESI): *m/z* [*M* + *H*]<sup>+</sup> calcd. for C<sub>26</sub>H<sub>28</sub>N<sub>6</sub>O<sub>6</sub>: 521.2143, found: 521.2172.

**(*S,S*)-*N*-(Benzyloxycarbonyl)-phenylalanyl-*O*-((1-(2-carboxyethyl)-1*H*-1,2,3-triazol-4-yl)-methyl)-homoserine nitrile (15).** Compound **37** (0.21 g, 0.50 mmol) and 3-azidopropanoic acid (**31**, 58.0 mg, 0.50 mmol) were dissolved in DMSO/H<sub>2</sub>O (2:1, 30 mL). Sodium ascorbate (0.10 g, 0.50 mmol) and copper(II) sulfate pentahydrate (62.0 mg, 0.25 mmol) were added and the reaction mixture was stirred overnight at rt. Then, 2N HCl solution (50 mL) was added and the aqueous suspension was extracted with ethyl acetate (4 × 30 mL). The combined organic layers were washed with brine (20 mL). The solvent was dried over Na<sub>2</sub>SO<sub>4</sub> and evaporated. The crude product was purified by column chromatography using ethyl acetate/MeOH/acetic acid (94:5:1) to obtain **15** as a colorless resin (81.0 mg, 30%). <sup>1</sup>H NMR (500 MHz, DMSO-*d*<sub>6</sub>) δ 1.93-2.07 (m, 2H), 2.78 (dd, 1H, *J* = 13.6 Hz, *J* = 10.1 Hz), 2.86 (t, 2H, <sup>3</sup>*J* = 6.6 Hz), 2.96 (dd, 1H, *J* = 13.6 Hz, *J* = 4.4 Hz), 3.50 (t, 2H, *J* = 5.8 Hz), 4.19-4.23 (m, 1H), 4.48 (s, 2H), 4.52 (t, 2H, *J* = 6.8 Hz), 4.75-4.79 (m, 1H), 4.91-4.98 (m, 2H), 7.19-7.32 (m, 10H), 7.61 (d, 1H, *J* = 8.6 Hz), 8.04 (s, 1H), 8.79 (d, 1H, *J* = 7.6 Hz); <sup>13</sup>C NMR (125 MHz, DMSO-*d*<sub>6</sub>) δ 31.81, 34.29, 37.25, 37.57, 45.50, 56.18, 63.68, 65.10, 65.47, 119.08, 124.16, 126.51, 127.62, 127.83, 128.25, 128.41, 129.30, 137.05, 137.76, 143.77,

155.99, 171.71, 171.89; LC-MS (ESI) (90% H<sub>2</sub>O to 100% MeOH in 10 min, then 100% MeOH to 20 min, DAD 220-400 nm), m/z = 535 ([M + H]<sup>+</sup>), 97% purity. QTOF: HRMS (ESI): m/z [M + H]<sup>+</sup> calcd. for C<sub>27</sub>H<sub>30</sub>BrN<sub>6</sub>O<sub>6</sub>: 535.2305, found: 535.2314.

**(*S,S*)-*N*-(*tert*-Butyloxycarbonyl)-3-bromophenylalanyl-*O*-(propynyl)-serine amide (38).**

(*S*)-*N*-(*tert*-Butyloxycarbonyl)-3-bromophenylalanine (**21**, 0.59 g, 1.70 mmol) was dissolved in dry CH<sub>2</sub>Cl<sub>2</sub> (20 mL). DIPEA (1.10 g, 8.5 mmol) and HATU (0.65 g, 1.70 mmol) were added and it was stirred for 10 min at rt. (*S*)-*O*-(Propynyl)-serine amide trifluoroacetate (**25**, 0.44 g, 1.70 mmol) was dissolved in dry CH<sub>2</sub>Cl<sub>2</sub> (10 mL) and added to the reaction mixture. It was stirred overnight at rt. The solvent was evaporated under reduced pressure and the resulting residue was suspended in ethyl acetate. The organic layer was washed with 10% KHSO<sub>4</sub> (30 mL), H<sub>2</sub>O (30 mL), sat. NaHCO<sub>3</sub> (30 mL), H<sub>2</sub>O (30 mL) and brine (30 mL). The solvent was dried over Na<sub>2</sub>SO<sub>4</sub> and evaporated. The crude product was purified by column chromatography using ethyl acetate/petroleum ether (2:1) to obtain **38** as a colorless solid (0.80 g, 99%); mp 140–141 °C; <sup>1</sup>H NMR (500 MHz, DMSO-*d*<sub>6</sub>) δ 1.29 (s, 9H), 2.69-2.72 (m, 1H), 2.99-3.01 (m, 1H), 3.42 (t, 1H, *J* = 2.2 Hz), 3.59 (dd, 1H, *J* = 9.6 Hz, *J* = 5.1 Hz), 3.67 (dd, 1H, *J* = 9.8 Hz, *J* = 5.5 Hz), 4.15 (s, 2H), 4.17-4.21 (m, 1H), 4.36-4.40 (m, 1H), 7.01 (d, 1H, *J* = 8.5 Hz), 7.14 (s, 1H), 7.22 (t, 1H, *J* = 7.6 Hz), 7.27 (d, 1H, *J* = 7.6 Hz), 7.36 (t, 2H, *J* = 9.1 Hz), 7.50 (s, 1H), 7.96 (d, 1H, *J* = 7.6 Hz); <sup>13</sup>C NMR (125 MHz, DMSO-*d*<sub>6</sub>) δ 28.23, 36.94, 52.51, 55.64, 57.93, 69.56, 77.59, 78.36, 80.05, 121.44, 128.55, 129.17, 130.22, 132.10, 141.27, 155.43, 171.11, 171.43; LC-MS (ESI) (90% H<sub>2</sub>O to 100% MeOH in 10 min, then 100% MeOH to 20 min, DAD 220-400 nm), m/z = 468 and 470 ([M + H]<sup>+</sup>), 91% purity.

**(*S,S*)-*N*-(4-Phenylbenzoyl)-3-bromophenylalanyl-*O*-(propynyl)-serine amide (40).**

Compound **38** (0.68 g, 1.45 mmol) was dissolved in dry CH<sub>2</sub>Cl<sub>2</sub> (30 mL) and cooled at 0 °C. Trifluoroacetic acid (20 mL) was added and the reaction mixture was stirred for 2 h. The solvent was evaporated under reduced pressure to obtain (*S*)-3-bromophenylalanyl-*O*-(propynyl)-serine amide trifluoroacetate (**39**) as an oily residue. Biphenyl-4-carboxylic acid (0.29 g, 1.45 mmol) was dissolved in dry CH<sub>2</sub>Cl<sub>2</sub> (20 mL). DIPEA (0.94 g, 7.25 mmol) and HATU (0.55 g, 1.45 mmol) were added and stirred for 10 min at rt. Compound **39** (0.70 g, 1.45 mmol) was dissolved in dry CH<sub>2</sub>Cl<sub>2</sub> (10 mL) and added to the reaction mixture. It was stirred overnight at rt. The solvent was evaporated under reduced pressure and the resulting residue was suspended in ethyl acetate. The organic layer was washed with 10% KHSO<sub>4</sub> (30 mL), H<sub>2</sub>O (30 mL), sat. NaHCO<sub>3</sub> (30 mL), H<sub>2</sub>O (30 mL) and brine (30 mL). The solvent was

dried over Na<sub>2</sub>SO<sub>4</sub> and evaporated. The crude product was purified by column chromatography using ethyl acetate/petroleum ether (2:1) to obtain **40** as a colorless solid (0.40 g, 50% over two steps); mp 229–230 °C; <sup>1</sup>H NMR (500 MHz, DMSO-*d*<sub>6</sub>) δ 2.98 (dd, 1H, *J* = 11.4 Hz, *J* = 9.4 Hz), 3.16 (dd, 1H, *J* = 11.5 Hz, *J* = 3.1 Hz), 3.44 (t, 1H, *J* = 2.0 Hz), 3.63 (dd, 1H, *J* = 8.1 Hz, *J* = 4.2 Hz), 3.69 (dd, 1H, *J* = 8.0 Hz, *J* = 4.9 Hz), 4.14–4.20 (m, 2H), 4.41–4.44 (m, 1H), 4.77–4.81 (m, 1H), 7.16 (s, 1H), 7.21 (t, 1H, *J* = 6.6 Hz), 7.34–7.41 (m, 4H), 7.48 (t, 2H, *J* = 6.4 Hz), 7.65 (s, 1H), 7.71–7.75 (m, 4H), 7.87 (d, 2H, *J* = 6.9 Hz), 8.24 (d, 1H, *J* = 6.9 Hz), 8.66 (d, 1H, *J* = 7.0 Hz); <sup>13</sup>C NMR (125 MHz, DMSO-*d*<sub>6</sub>) δ 37.05, 53.05, 55.14, 58.28, 69.92, 77.98, 80.42, 121.85, 126.91, 127.34, 128.54, 128.87, 129.49, 129.59, 130.60, 132.48, 133.26, 139.61, 141.85, 143.37, 166.60, 171.48, 171.64; LC-MS (ESI) (90% H<sub>2</sub>O to 100% MeOH in 10 min, then 100% MeOH to 20 min, DAD 220–400 nm), *m/z* = 548 and 550 ([*M* + *H*]<sup>+</sup>), 91% purity.

**(*S,S*)-*N*-(4-Phenylbenzoyl)-3-bromophenylalanyl-*O*-(propynyl)-serine nitrile (41).**

Compound **40** (0.38 g, 0.70 mmol) was dissolved in dry DMF (20 mL) and cyanuric chloride (0.13 g, 0.70 mmol) was added. The reaction mixture was stirred overnight at rt. Then, H<sub>2</sub>O (30 mL) was added and the aqueous suspension was extracted with ethyl acetate (4 × 30 mL). The combined organic layers were washed with H<sub>2</sub>O (20 mL) and brine (20 mL). The solvent was dried over Na<sub>2</sub>SO<sub>4</sub> and evaporated. The crude product was purified by column chromatography using ethyl acetate/ petroleum ether 2:1 to obtain **41** as yellow oil (0.31 g, 83%). <sup>1</sup>H NMR (500 MHz, DMSO-*d*<sub>6</sub>) δ 3.01 (dd, 1H, *J* = 11.4 Hz, *J* = 9.2 Hz), 3.10 (dd, 1H, *J* = 11.4 Hz, *J* = 3.4 Hz), 3.53 (t, 1H, *J* = 2.0 Hz), 3.70–3.74 (m, 2H), 4.27–4.33 (m, 2H), 4.74–4.78 (m, 1H), 5.05–5.08 (m, 1H), 7.22 (t, 1H, *J* = 6.5 Hz), 7.36–7.41 (m, 3H), 7.48 (t, 2H, *J* = 6.4 Hz), 7.63 (s, 1H), 7.71 (d, 2H, *J* = 6.0 Hz), 7.75 (d, 2H, *J* = 7.1 Hz), 7.89 (d, 2H, *J* = 7.0 Hz), 8.72 (d, 1H, *J* = 7.1 Hz), 9.06 (d, 1H, *J* = 6.4 Hz); <sup>13</sup>C NMR (125 MHz, DMSO-*d*<sub>6</sub>) δ 36.54, 40.60, 54.50, 58.18, 67.99, 78.21, 79.59, 118.03, 121.51, 126.53, 126.98, 128.23, 128.47, 129.13, 129.37, 130.30, 132.08, 132.70, 139.22, 141.06, 143.06, 166.19, 171.60; LC-MS (ESI) (90% H<sub>2</sub>O to 100% MeOH in 10 min, then 100% MeOH to 20 min, DAD 220–400 nm), *m/z* = 530 and 532 ([*M* + *H*]<sup>+</sup>), 95% purity.

**(*S,S*)-*N*-(4-Phenylbenzoyl)-3-bromophenylalanyl-*O*-((1-(methoxycarbonylmethyl)-1*H*-1,2,3-triazol-4-yl)methyl)-serine nitrile (16).** Methyl bromoacetate (**42**, 0.31 g, 2.00 mmol) was dissolved in dry DMF (5 mL). Sodium azide (0.13 g, 2.00 mmol) was added and it was stirred overnight. The reaction mixture was diluted with H<sub>2</sub>O (30 mL) and extracted with

diethyl ether (3 × 20 mL). The combined organic layers were washed with brine (30 mL). The solvent was dried over Na<sub>2</sub>SO<sub>4</sub> and evaporated at 25 °C to obtain methyl azidoacetate (**43**) as an oily product which was used without further purification. Compounds **41** (0.11 g, 0.20 mmol) and **43** (23.0 mg, 0.20 mmol) were suspended in DMSO/H<sub>2</sub>O (3:1, 20 mL). Sodium ascorbate (40.0 mg, 0.20 mmol) and copper(II) sulfate pentahydrate (25.0 mg, 0.10 mmol) were added and the reaction mixture was stirred overnight at rt. Then, H<sub>2</sub>O (50 mL) was added and the aqueous suspension was extracted with ethyl acetate (4 × 30 mL). The combined organic layers were washed with H<sub>2</sub>O (20 mL) and brine (20 mL). The solvent was dried over Na<sub>2</sub>SO<sub>4</sub> and evaporated. The crude product was purified by column chromatography using ethyl acetate/petroleum ether (4:1) to obtain **16** as a colorless solid (78.0 mg, 60%). mp 164–165 °C; <sup>1</sup>H NMR (500 MHz, DMSO-*d*<sub>6</sub>) δ 2.98-3.03 (m, 1H), 3.09 (dd, 1H, *J* = 13.4 Hz, *J* = 3.7 Hz), 3.69 (s, 3H), 3.74 (d, 2H, *J* = 5.7 Hz), 4.70 (s, 2H), 4.73-4.78 (m, 1H), 5.04-5.07 (m, 1H), 5.40 (s, 2H), 7.22 (t, 1H, *J* = 7.7 Hz), 7.36 (d, 2H, *J* = 7.6 Hz), 7.40 (d, 1H, *J* = 7.3 Hz), 7.48 (t, 2H, *J* = 7.6 Hz), 7.62 (s, 1H), 7.71-7.75 (m, 4H), 7.89 (d, 2H, *J* = 7.6 Hz), 8.14 (s, 1H), 8.72 (d, 1H, *J* = 8.5 Hz), 9.07 (d, 1H, *J* = 7.6 Hz); <sup>13</sup>C NMR (125 MHz, DMSO-*d*<sub>6</sub>) δ 36.59, 40.74, 50.42, 52.66, 54.58, 63.97, 68.47, 118.13, 121.56, 125.79, 126.57, 127.02, 128.27, 128.50, 129.18, 129.41, 130.35, 132.12, 132.74, 139.26, 141.09, 143.11, 143.48, 166.29, 167.82, 171.62; LC-MS (ESI) (90% H<sub>2</sub>O to 100% MeOH in 10 min, then 100% MeOH to 20 min, DAD 220-400 nm), *m/z* = 645 and 647 ([*M* + *H*]<sup>+</sup>), 99% purity. QTOF: HRMS (ESI): *m/z* [*M* + *H*]<sup>+</sup> calcd. for C<sub>31</sub>H<sub>29</sub>BrN<sub>6</sub>O<sub>5</sub>: 645.1456 and 647.1436, found: 645.1447 and 647.1424.

**(*S,S*)-*N*-(4-Phenylbenzoyl)-3-bromophenylalanyl-*O*-((1-(carboxymethyl)-1*H*-1,2,3-triazol-4-yl)methyl)-serine nitrile (**17**)**. Compound **41** (0.13 g, 0.25 mmol) and azidoacetic acid (**30**, 25.0 mg, 0.25 mmol) were suspended in DMSO/H<sub>2</sub>O (4:1, 25 mL). Sodium ascorbate (50.0 mg, 0.25 mmol) and copper(II) sulfate pentahydrate (25.0 mg, 0.13 mmol) were added and the reaction mixture was stirred overnight at rt. Then, 10% KHSO<sub>4</sub> solution (50 mL) was added and the aqueous suspension was extracted with ethyl acetate (4 × 30 mL). The combined organic layers were washed with 10% KHSO<sub>4</sub> (20 mL), H<sub>2</sub>O (20 mL) and brine (20 mL). The solvent was dried over Na<sub>2</sub>SO<sub>4</sub> and evaporated. The crude product was purified by column chromatography using CH<sub>2</sub>Cl<sub>2</sub>/MeOH/acetic acid (89:10:1) to obtain **17** as a colorless solid (90.0 mg, 57%). mp 190–191 °C; <sup>1</sup>H NMR (500 MHz, DMSO-*d*<sub>6</sub>) δ <sup>1</sup>H NMR (500 MHz, DMSO-*d*<sub>6</sub>) δ 3.01 (dd, 1H, *J* = 13.6 Hz, *J* = 11.0 Hz), 3.09 (dd, 1H, *J* = 13.6 Hz, *J* = 4.1 Hz), 3.73 (d, 2H, *J* = 5.7 Hz), 4.64-4.69 (m, 2H), 4.73-4.78 (m, 1H), 4.94 (s, 2H), 5.02-

5.06 (m, 1H), 7.21 (t, 1H,  $J = 7.9$  Hz), 7.35-7.41 (m, 3H), 7.46-7.49 (m, 2H), 7.62 (t, 1H,  $J = 1.6$  Hz), 7.70-7.75 (m, 4H), 7.88-7.91 (m, 2H), 8.03 (s, 1H), 8.77 (d, 1H,  $J = 8.5$  Hz), 9.09 (d, 1H,  $J = 7.9$  Hz);  $^{13}\text{C}$  NMR (125 MHz, DMSO- $d_6$ )  $\delta$  36.57, 40.74, 52.56, 54.61, 64.08, 68.38, 118.15, 121.52, 125.53, 126.54, 127.00, 128.28, 128.50, 129.15, 129.37, 130.32, 132.11, 132.74, 139.27, 141.13, 142.79, 143.06, 166.23, 168.51, 171.62; LC-MS (ESI) (90% H<sub>2</sub>O to 100% MeOH in 10 min, then 100% MeOH to 20 min, DAD 220-400 nm),  $m/z = 631$  and  $633$  ( $[\text{M} + \text{H}]^+$ ), 98% purity. QTOF: HRMS (ESI):  $m/z$   $[\text{M} + \text{H}]^+$  calcd. for C<sub>30</sub>H<sub>27</sub>BrN<sub>6</sub>O<sub>5</sub>: 631.1299 and 633.1279, found: 631.1299 and 633.1276.

**(*S*)-*N*-(*tert*-Butyloxycarbonyl)-propargylglycine amide (45).** (*S*)-*N*-(*tert*-Butyloxycarbonyl)-propargylglycine (**44**, 1.07 g, 5.00 mmol) was dissolved in dry THF (20 mL) and cooled at -25 °C. To the stirred solution, *N*-methylmorpholine (0.51 g, 5.00 mmol) and isobutyl chloroformate (0.68 g, 5.00 mmol) were added consecutively. Conc'd aqueous ammonia solution (25%, 1.87 mL, 25.0 mmol) was given to the reaction mixture when the precipitation of *N*-methylmorpholine hydrochloride occurred. It was allowed to warm to rt within 30 min and stirred overnight at rt. After evaporation of the solvent the resulting aqueous residue was extracted with ethyl acetate (3 × 30 mL). The combined organic layers were washed with 10% KHSO<sub>4</sub> (30 mL), H<sub>2</sub>O (30 mL), sat. NaHCO<sub>3</sub> (30 mL), H<sub>2</sub>O (30 mL) and brine (30 mL). The solvent was dried over Na<sub>2</sub>SO<sub>4</sub> and evaporated. The crude colorless solid **45** was used without further purification (0.88 g, 83%); mp 109–110 °C;  $^1\text{H}$  NMR (500 MHz, DMSO- $d_6$ )  $\delta$  1.38 (s, 9H), 2.38-2.44 (m, 1H), 2.50-2.55 (m, 1H), 2.78 (s, 1H), 4.00-4.04 (m, 1H), 6.73 (d, 1H,  $J = 8.2$  Hz), 7.07 (s, 1H), 7.31 (s, 1H);  $^{13}\text{C}$  NMR (125 MHz, DMSO- $d_6$ )  $\delta$  22.07, 28.29, 52.99, 72.76, 78.36, 81.05, 155.18, 172.20; LC-MS (ESI) (90% H<sub>2</sub>O to 100% MeOH in 10 min, then 100% MeOH to 20 min, DAD 220-400 nm),  $m/z = 213$   $[\text{M} + \text{H}]^+$ ; 83% purity.

**(*S,S*)-*N*-(*tert*-Butyloxycarbonyl)-3-bromophenylalanyl-propargylglycine amide (47).** Compound **45** (0.17 g, 0.80 mmol) was dissolved in trifluoroacetic acid/CH<sub>2</sub>Cl<sub>2</sub> (1:1, 20 mL) and stirred for 3 h at 0 °C. The solvent was evaporated under reduced pressure to obtain (*S*)-propargylglycine amide trifluoroacetate (**46**) as an oily residue. (*S*)-*N*-(*tert*-Butyloxycarbonyl)-3-bromophenylalanine (**21**, 0.28 g, 0.80 mmol) was dissolved in dry CH<sub>2</sub>Cl<sub>2</sub> (20 mL). DIPEA (0.52 g, 4.00 mmol) and HATU (0.30 g, 0.80 mmol) were added and it was stirred for 10 min at rt. Compound **46** (0.18 g, 0.80 mmol) was dissolved in dry CH<sub>2</sub>Cl<sub>2</sub> (10 mL) and added to the reaction mixture. It was stirred overnight at rt. The solvent was

evaporated under reduced pressure and the resulting residue was suspended in ethyl acetate. The organic layer was washed with 10% KHSO<sub>4</sub> (30 mL), H<sub>2</sub>O (30 mL), sat. NaHCO<sub>3</sub> (30 mL), H<sub>2</sub>O (30 mL) and brine (30 mL). The solvent was dried over Na<sub>2</sub>SO<sub>4</sub> and evaporated. The crude product was purified by recrystallization using ethyl acetate to obtain **47** as a light yellow solid (0.33 g, 94% over two steps); mp 152–154 °C; <sup>1</sup>H NMR (500 MHz, DMSO-*d*<sub>6</sub>) δ 1.29 (s, 9H), 2.52-2.55 (m, 2H), 2.71 (dd, 1H, *J* = 13.6 Hz, *J* = 11.0 Hz), 2.83 (t, 1H, *J* = 2.5 Hz), 2.99 (dd, 1H, *J* = 13.7 Hz, *J* = 3.6 Hz), 4.15-4.20 (m, 1H), 4.31 (q, 1H, *J* = 6.7 Hz), 7.03 (d, 1H, *J* = 8.5 Hz), 7.18 (s, 1H), 7.20-7.23 (m, 1H), 7.26-7.28 (m, 1H), 7.36-7.39 (m, 2H), 7.49 (s, 1H), 8.01 (d, 1H, *J* = 8.5 Hz); <sup>13</sup>C NMR (125 MHz, DMSO-*d*<sub>6</sub>) δ 21.96, 28.22, 37.03, 51.36, 55.75, 73.16, 78.38, 80.53, 121.45, 128.52, 129.18, 130.23, 132.08, 141.20, 155.40, 171.39, 171.46; LC-MS (ESI) (90% H<sub>2</sub>O to 100% MeOH in 10 min, then 100% MeOH to 20 min, DAD 220-400 nm), *m/z* = 438 and 440 [M + H]<sup>+</sup>; 93% purity.

**(*S,S*)-*N*-(4-Phenylbenzoyl)-3-bromophenylalanyl-propargylglycine amide (49).**

Compound **47** (0.30 g, 0.68 mmol) was dissolved in trifluoroacetic acid/CH<sub>2</sub>Cl<sub>2</sub> (1:1, 30 mL) and stirred for 3 h at 0 °C. The solvent was evaporated under reduced pressure to obtain (*S,S*)-3-bromophenylalanyl-propargylglycine amide trifluoroacetate (**48**) as an oily residue. Biphenyl-4-carboxylic acid (0.13 g, 0.68 mmol) was dissolved in dry CH<sub>2</sub>Cl<sub>2</sub> (20 mL). DIPEA (0.44 g, 3.40 mmol) and HATU (0.26 g, 0.68 mmol) were added and it was stirred for 10 min at rt. Compound **48** (0.31 g, 0.68 mmol) was dissolved in dry CH<sub>2</sub>Cl<sub>2</sub> (10 mL) and added to the reaction mixture. It was stirred overnight at rt. The solvent was evaporated under reduced pressure and the resulting residue was suspended in ethyl acetate. The organic layer was washed with 10% KHSO<sub>4</sub> (30 mL), H<sub>2</sub>O (30 mL), sat. NaHCO<sub>3</sub> (30 mL), H<sub>2</sub>O (30 mL) and brine (30 mL). The solvent was dried over Na<sub>2</sub>SO<sub>4</sub> and evaporated. The crude product was purified by recrystallization using ethyl acetate to obtain **49** as a colorless solid (0.23 g, 65% over two steps); mp 226–227 °C; <sup>1</sup>H NMR (500 MHz, DMSO-*d*<sub>6</sub>) δ 2.53-2.63 (m, 2H), 2.83 (t, 1H, *J* = 2.5 Hz), 3.01 (dd, 1H, *J* = 13.7 Hz, *J* = 10.9 Hz), 3.16 (dd, 1H, *J* = 13.7 Hz, *J* = 3.9 Hz), 4.33-4.37 (m, 1H), 4.74-4.79 (m, 1H), 7.19 (s, 1H), 7.21 (t, 1H, *J* = 7.7 Hz), 7.34-7.36 (m, 1H), 7.37-7.41 (m, 2H), 7.45 (s, 1H), 7.46-7.49 (m, 2H), 7.64 (t, 1H, *J* = 1.7 Hz), 7.70-7.75 (m, 4H), 7.88-7.89 (m, 2H), 8.32 (d, 1H, *J* = 7.9 Hz), 8.71 (d, 1H, *J* = 8.5 Hz); <sup>13</sup>C NMR (125 MHz, DMSO-*d*<sub>6</sub>) δ 21.92, 36.72, 51.66, 54.94, 73.14, 80.65, 121.49, 126.54, 126.99, 128.18, 128.22, 128.50, 129.14, 129.25, 130.27, 132.12, 132.93, 139.27, 141.45, 143.02, 166.25, 171.22, 171.54; LC-MS (ESI) (90% H<sub>2</sub>O to 100% MeOH in 10 min, then 100% MeOH to 20 min, DAD 220-400 nm), *m/z* = 518 and 520 [M + H]<sup>+</sup>; 95% purity.



**(*S,S*)-*N*-(4-Phenylbenzoyl)-3-bromophenylalanyl-propargylglycine nitrile (50).**

Compound **49** (0.38 g, 0.70 mmol) was dissolved in dry DMF (15 mL) and cyanuric chloride (0.08 g, 0.41 mmol) was added. The reaction mixture was stirred overnight at rt. Then, H<sub>2</sub>O (30 mL) was added and the aqueous suspension was extracted with ethyl acetate (4 × 30 mL). The combined organic layers were washed with H<sub>2</sub>O (20 mL) and brine (20 mL). The solvent was dried over Na<sub>2</sub>SO<sub>4</sub> and evaporated. The crude product was purified by column chromatography using ethyl acetate/ petroleum ether 1:1 to obtain **50** as colorless solid (0.15 g, 75%); mp 211–212 °C; <sup>1</sup>H NMR (500 MHz, DMSO-*d*<sub>6</sub>) δ 2.77-2.79 (m, 2H), 2.99-3.04 (m, 1H), 3.10-3.14 (m, 2H), 4.73-4.78 (m, 1H), 4.91 (q, 1H, *J* = 7.2 Hz), 7.22 (t, 1H, *J* = 7.7 Hz), 7.35-7.41 (m, 3H), 7.48 (t, 2H, *J* = 7.7 Hz), 7.61 (s, 1H), 7.71-7.76 (m, 4H), 7.90 (d, 2H, *J* = 8.2 Hz), 8.72 (d, 1H, *J* = 8.2 Hz), 9.05 (d, 1H, *J* = 7.3 Hz); <sup>13</sup>C NMR (125 MHz, DMSO-*d*<sub>6</sub>) δ 22.24, 36.62, 54.50, 74.86, 78.65, 118.31, 121.54, 126.54, 126.99, 128.20, 128.26, 128.44, 129.14, 129.39, 130.35, 132.06, 132.73, 139.25, 141.06, 143.08, 166.19, 171.51, one carbon signal is obscured by the DMSO signal; LC-MS (ESI) (90% H<sub>2</sub>O to 100% MeOH in 10 min, then 100% MeOH to 20 min, DAD 220-400 nm), *m/z* = 500 and 502 [*M* + *H*]<sup>+</sup>; 98% purity.

**(*S,S*)-*N*-(4-Phenylbenzoyl)-3-bromophenylalanyl-2-((1-(2-(carboxyethyl)-1*H*-1,2,3-triazol-4-yl)methyl)-glycine nitrile (18).** Compound **50** (60.0 mg, 0.12 mmol) and 3-azidopropanoic acid (**31**, 14.0 mg, 0.12 mmol) were suspended in DMSO/H<sub>2</sub>O (4:1, 25 mL). Sodium ascorbate (24.0 mg, 0.12 mmol) and copper(II) sulfate pentahydrate (15.0 mg, 0.06 mmol) were added and the reaction mixture was stirred overnight at rt. Then, 10% KHSO<sub>4</sub> solution (50 mL) was added and the aqueous suspension was extracted with ethyl acetate (4 × 30 mL). The combined organic layers were washed with 10% KHSO<sub>4</sub> (20 mL), H<sub>2</sub>O (20 mL) and brine (20 mL). The solvent was dried over Na<sub>2</sub>SO<sub>4</sub> and evaporated. The crude product was purified by column chromatography using ethyl acetate/MeOH/acetic acid (89:10:1) to obtain **18** as a colorless solid (26.0 mg, 35%). mp 170-172 °C; <sup>1</sup>H NMR (500 MHz, DMSO-*d*<sub>6</sub>) δ 2.83 (t, 2H, *J* = 7.0 Hz), 3.03 (dd, 1H, *J* = 13.7 Hz, *J* = 10.6 Hz), 3.09-3.16 (m, 3H), 3.23-3.27 (m, 1H), 4.51 (t, 2H, *J* = 6.8 Hz), 4.67-4.72 (m, 1H), 5.02 (q, 1H, *J* = 7.7 Hz), 7.22 (t, 1H, *J* = 7.9 Hz), 7.34-7.41 (m, 3H), 7.47-7.50 (m, 2H), 7.59 (t, 1H, *J* = 1.6 Hz), 7.71-7.76 (m, 4H), 7.91-7.93 (m, 2H), 8.01 (s, 1H), 8.79 (d, 1H, *J* = 8.2 Hz), 9.04 (d, 1H, *J* = 7.6 Hz); <sup>13</sup>C NMR (125 MHz, DMSO-*d*<sub>6</sub>) δ 28.35, 34.60, 36.40, 45.71, 54.77, 118.82, 121.56, 123.82, 126.55, 127.01, 128.21, 128.31, 128.43, 129.15, 129.40, 130.37, 132.08, 132.68, 139.27, 140.97, 141.12, 143.12, 166.31, 171.43, 171.96; LC-MS (ESI) (90% H<sub>2</sub>O to 100% MeOH in

10 min, then 100% MeOH to 20 min, DAD 220-400 nm),  $m/z = 614$  ( $[M + H]^+$ ), 97% purity. QTOF: HRMS (ESI):  $m/z$   $[M - H]^-$  calcd. for  $C_{30}H_{27}N_6O_4$ : 613.1204 and 615.1189, found: 613.1239 and 615.1189.

**(*S,S*)-*N*-(4-Phenylbenzoyl)-3-bromophenylalanyl-2-((1-(carboxymethyl)-1*H*-1,2,3-triazol-4-yl)methyl)-glycine nitrile (19).** Compound **50** (60.0 mg, 0.12 mmol) and azidoacetic acid (**30**, 12.0 mg, 0.12 mmol) were suspended in DMSO/H<sub>2</sub>O (4:1, 25 mL). Sodium ascorbate (24.0 mg, 0.12 mmol) and copper(II) sulfate pentahydrate (15.0 mg, 0.06 mmol) were added and the reaction mixture was stirred overnight at rt. Then, 10% KHSO<sub>4</sub> solution (50 mL) was added and the aqueous suspension was extracted with ethyl acetate (4 × 30 mL). The combined organic layers were washed with 10% KHSO<sub>4</sub> (20 mL), H<sub>2</sub>O (20 mL) and brine (20 mL). The solvent was dried over Na<sub>2</sub>SO<sub>4</sub> and evaporated. The crude product was purified by column chromatography using ethyl acetate/MeOH/acetic acid (89:10:1) to obtain **19** as a colorless solid (71.0 mg, 98%). mp 164-166 °C; <sup>1</sup>H NMR (500 MHz, DMSO-*d*<sub>6</sub>) δ 3.00 (dd, 1H,  $J = 13.4$  Hz,  $J = 10.9$  Hz), 3.10-3.15 (m, 2H), 3.22-3.26 (m, 1H), 4.72 (s, 3H), 5.00 (q, 1H,  $J = 7.7$  Hz), 7.20 (t, 1H,  $J = 7.9$  Hz), 7.34-7.36 (m, 2H), 7.39 (t, 1H,  $J = 7.3$  Hz), 7.48 (t, 2H,  $J = 7.7$  Hz), 7.59 (s, 1H), 7.71-7.75 (m, 4H), 7.87 (s, 1H), 7.93 (d, 2H,  $J = 8.5$  Hz), 8.97 (d, 1H,  $J = 8.2$  Hz), 9.17 (d, 1H,  $J = 6.9$  Hz); <sup>13</sup>C NMR (125 MHz, DMSO-*d*<sub>6</sub>) δ 28.35, 36.38, 53.75, 54.87, 119.04, 121.51, 124.75, 126.52, 127.00, 128.17, 128.36, 128.48, 129.15, 129.32, 130.32, 132.09, 132.76, 139.31, 140.25, 141.28, 143.02, 166.29, 168.41, 171.45, one carbon signal is obscured by the DMSO signal; LC-MS (ESI) (90% H<sub>2</sub>O to 100% MeOH in 10 min, then 100% MeOH to 20 min, DAD 220-400 nm),  $m/z = 601$  and  $603$  ( $[M + H]^+$ ), 97% purity. QTOF: HRMS (ESI):  $m/z$   $[M - H]^-$  calcd. for  $C_{29}H_{25}BrN_6O_4$ : 599.1048 and 601.1032, found: 599.1098 and 601.1080.

**(*S*)-*N*-(*tert*-Butyloxycarbonyl)-cyclohexylalanyl-glycine nitrile (57).** (*S*)-*N*-(*tert*-Butyloxycarbonyl)-cyclohexylalanine (0.95 g, 3.50 mmol) was dissolved in dry THF (10 mL) and cooled at -25°C. To the stirred solution, NMM (0.35 g, 3.50 mmol) and isobutyl chloroformate (0.48 g, 3.50 mmol) were added consecutively. Aminoacetonitrile monosulfate (0.54 g, 3.50 mmol) was dissolved in 2 N NaOH (1.75 mL, 3.50 mmol) and given to the reaction mixture. It was allowed to warm up to rt within 30 min and stirred overnight at rt. After evaporation of the solvent, the residue was extracted with ethyl acetate (3 × 50 mL). The combined organic layers were washed with 10% KHSO<sub>4</sub> (30 mL), H<sub>2</sub>O (30 mL), sat. NaHCO<sub>3</sub> (2 × 30 mL), H<sub>2</sub>O (30 mL) and brine (30 mL). The solvent was dried (Na<sub>2</sub>SO<sub>4</sub>) and

evaporated. The crude product was recrystallized from ethyl acetate to obtain **57** as a white solid (0.35 g, 32%); mp 82–83 °C, lit.<sup>4</sup> mp 81–83 °C; <sup>1</sup>H NMR (500 MHz, DMSO-*d*<sub>6</sub>) δ 0.78–0.92 (m, 2H), 1.08–1.18 (m, 3H), 1.23–1.29 (m, 1H), 1.37 (s, 9H), 1.41 (t, *J* = 7.1 Hz, 2H), 1.58–1.71 (m, 5H), 3.98 (q, *J* = 7.7 Hz, 1H), 4.09 (dd, *J* = 5.6 Hz, *J* = 2.7 Hz, 2H), 6.93 (d, *J* = 8.2 Hz, 1H), 8.50 (t, *J* = 5.5 Hz, 1H); <sup>13</sup>C NMR (125 MHz, DMSO-*d*<sub>6</sub>) δ 25.78, 25.97, 26.17, 27.20, 28.30, 31.83, 33.24, 33.70, 51.93, 78.22, 117.68, 155.53, 173.48, one carbon signal is obscured by the DMSO signal; LC-MS(ESI) (90% H<sub>2</sub>O to 100% MeOH in 20 min, then 100% MeOH over 10 min, DAD 220-400 nm), *m/z* = 308 ([*M* – H]<sup>–</sup>), 100% purity. *M* = 309.40 g/mol

**(S)-N-(4-Phenylbenzoyl)-cyclohexylalanyl-glycine nitrile (91)**. Compound **57** (0.31 g, 1.00 mmol) was dissolved in dry THF (8 mL). Under ice cooling, methanesulfonic acid (0.58 g, 6.00 mmol) was added. The resulting mixture was stirred at rt overnight. The solvent was evaporated and the crude product, cyclohexylalanyl-glycine nitrile methanesulfonate, was used without further purification. Biphenyl-4-carboxylic acid (52.0 mg, 0.25 mmol) was dissolved in dry CH<sub>2</sub>Cl<sub>2</sub> (10 mL). DIPEA (97.0 mg, 0.75 mmol) and HATU (95.0 mg, 0.25 mmol) were added and stirred for 10 min at rt. Cyclohexylalanyl-glycine nitrile methanesulfonate (76.0 mg, 0.25 mmol) was dissolved in dry CH<sub>2</sub>Cl<sub>2</sub> (5 mL) and added to the reaction mixture. It was stirred overnight at rt. The solvent was evaporated under reduced pressure and the resulting residue was suspended in ethyl acetate (20 mL). The organic layer was washed with 10% KHSO<sub>4</sub> (15 mL), H<sub>2</sub>O (15 mL), sat. NaHCO<sub>3</sub> (15 mL), H<sub>2</sub>O (15 mL) and brine (15 mL). The solvent was dried over Na<sub>2</sub>SO<sub>4</sub> and evaporated. The crude product was purified by column chromatography using ethyl acetate to obtain **91** as a white solid (59.0 mg, 61%); mp 179–180 °C; <sup>1</sup>H NMR (500 MHz, DMSO-*d*<sub>6</sub>) δ 0.84-0.99 (m, 2H), 1.08-1.19 (m, 3H), 1.31-1.39 (m, 1H), 1.58-1.74 (m, 7H, C<sub>6</sub>H<sub>11</sub>, CHCH<sub>2</sub>), 4.12 (d, 2H, *J* = 5.4 Hz, CH<sub>2</sub>CN), 4.53-4.57 (m, 1H, CH), 7.39-7.42 (m, 1H, H<sub>arom</sub>), 7.48-7.51 (m, 2H, H<sub>arom</sub>), 7.72-7.74 (m, 2H, H<sub>arom</sub>), 7.77 (d, 2H, *J* = 8.6 Hz, H<sub>arom</sub>), 8.01 (d, 2H, *J* = 8.2 Hz, H<sub>arom</sub>), 8.58 (d, 1H, *J* = 7.9 Hz, NHCH), 8.65 (t, 1H, *J* = 5.7 Hz, NHCH<sub>2</sub>CN); <sup>13</sup>C NMR (125 MHz, DMSO-*d*<sub>6</sub>) δ 25.73, 25.90, 26.17, 27.29, 31.72, 33.32, 33.89 (C<sub>6</sub>H<sub>11</sub>, CH<sub>2</sub>CN), 38.63 (CHCH<sub>2</sub>), 51.02 (CHCH<sub>2</sub>), 117.71 (CN), 126.51, 126.99, 128.17, 128.42, 129.14, 132.87, 139.34, 143.05 (C<sub>arom</sub>), 166.20 (CONHCH), 173.18 (CHCO); LC-MS(ESI) (90% H<sub>2</sub>O to 100% MeOH in 20 min, then 100% MeOH over 10 min, DAD 220-400 nm), *m/z* = 390 ([*M* + H]<sup>+</sup>), 96% purity. *M* = 389.49 g/mol

## Enzyme Inhibition Assays

Human cathepsins B and L were assayed photometrically on a Cary 50 Bio, Varian, at 405 nm. Peptidic substrates were purchased from Bachem AG (Bubendorf, Switzerland). The reactions were followed at 37 °C over 20 min. Human cathepsins K and S were assayed fluorimetrically on a Monaco Safas spectrofluorometer flx or on a PlateReader FLUOstar Optima, BMG Labtech. When using the substrates Cbz-Leu-Arg-AMC or Cbz-Phe-Arg-AMC, the wavelength for excitation was 360 nm and for emission was 440 nm. In case of the substrate Abz-Gly-Ile-Val-Arg-Ala-Lys(Dnp)-OH, 320 nm and 420 nm were used as excitation and emission wavelengths. The 10 mM inhibitor solutions were prepared in DMSO. The final concentration of DMSO in all assays was 2%. Progress curves were analyzed by linear regression.

**Cathepsin B inhibition assay at pH 6.0 with Cbz-Arg-Arg-pNA.**<sup>2</sup> Assay buffer was 100 mM sodium phosphate buffer pH 6.0, 100 mM NaCl, 5 mM EDTA, 0.01% Brij 35. A stock solution of human isolated cathepsin B (Calbiochem, Darmstadt, Germany) of 0.47 mg/mL in 20 mM sodium acetate buffer pH 5.0, 1 mM EDTA was diluted 1:500 with assay buffer containing 5 mM DTT and incubated for 30 min at 37 °C. A 100 mM stock solution of the chromogenic substrate Cbz-Arg-Arg-pNA was prepared with DMSO. The final concentration of the substrate was 500  $\mu$ M (0.45  $K_m$ ). Assays were performed with a final concentration of 19 ng/mL of cathepsin B. Into a cuvette containing 960  $\mu$ L assay buffer, inhibitor solution and DMSO in a total volume of 15  $\mu$ L, and 5  $\mu$ L of the substrate solution were added and thoroughly mixed. The reaction was initiated by adding 20  $\mu$ L of the cathepsin B solution. The reactions were followed at 37 °C over 20 min.

**Cathepsin B inhibition assay at pH 4.5 with Cbz-Arg-Arg-pNA.** Assay buffer was 50 mM sodium acetate buffer pH 4.5, 50 mM NaCl, 2.5 mM EDTA, 0.005% Brij 35. A stock solution of human isolated cathepsin B (Calbiochem, Darmstadt, Germany) of 0.47 mg/mL in 20 mM sodium acetate buffer pH 5.0, 1 mM EDTA was diluted 1:500 with assay buffer containing 5 mM DTT and incubated for 30 min at 37 °C. A 100 mM stock solution of the chromogenic substrate Cbz-Arg-Arg-pNA was prepared with DMSO. In inhibition assays, the final concentration of the substrate was 500  $\mu$ M (0.59  $K_m$ ). Assays were performed with a final concentration of 56 ng/mL of cathepsin B. Into a cuvette containing 920  $\mu$ L assay buffer, inhibitor solution and DMSO in a total volume of 15  $\mu$ L, and 5  $\mu$ L of the substrate solution

were added and thoroughly mixed. The reaction was initiated by adding 60  $\mu\text{L}$  of the cathepsin B solution. The reactions were followed at 37  $^{\circ}\text{C}$  over 20 min. A  $K_m$  value of  $853 \pm 72$   $\mu\text{M}$  was obtained in triplicate measurements with 21 different substrate concentrations between 20  $\mu\text{M}$  and 5000  $\mu\text{M}$ .

**Cathepsin B inhibition assay at pH 4.5 with Abz-Gly-Ile-Val-Arg-Ala-Lys(Dnp)-OH.** Assay buffer was 50 mM sodium acetate buffer pH 4.5, 50 mM NaCl, 2.5 mM EDTA, 0.005% Brij 35. A stock solution of human isolated cathepsin B (Calbiochem, Darmstadt, Germany) of 0.47 mg/mL in 20 mM sodium acetate buffer pH 5.0, 1 mM EDTA was diluted 1:1000 with assay buffer containing 5 mM DTT and incubated for 30 min at 37  $^{\circ}\text{C}$ . A 2 mM stock solution of the substrate Abz-Gly-Ile-Val-Arg-Ala-Lys(Dnp)-OH was prepared with DMSO. In inhibition assays, the final concentration of the substrate was 10  $\mu\text{M}$  ( $2.67 K_m$ ). Assays were performed with a final concentration of 2.35 ng/mL of cathepsin B. Into a cuvette containing 195  $\mu\text{L}$  assay buffer, inhibitor solution and DMSO in a total volume of 3  $\mu\text{L}$ , and 1  $\mu\text{L}$  of the substrate solution were added and thoroughly mixed. The reaction was initiated by adding 1  $\mu\text{L}$  of the cathepsin B solution. The reactions were followed at 37  $^{\circ}\text{C}$  over 10 min. A  $K_m$  value of  $3.74 \pm 0.51$   $\mu\text{M}$  was obtained in triplicate measurements with 12 different substrate concentrations between 1  $\mu\text{M}$  and 40  $\mu\text{M}$ .

**Cathepsin S inhibition assay.**<sup>6</sup> Assay buffer was 100 mM sodium phosphate buffer pH 6.0, 100 mM NaCl, 5 mM EDTA, and 0.01% Brij 35. A stock solution of human recombinant cathepsin S (Enzo Life Sciences, Lörrach, Germany) of 70  $\mu\text{g}/\text{mL}$  in 100 mM MES buffer, pH 6.5, 1 mM EDTA, 50 mM L-cysteine, 10 mM DTT, 0.5% Triton X-100 and 30% glycerol was diluted 1:100 with a 50 mM sodium phosphate buffer pH 6.5, 50 mM NaCl, 2 mM EDTA, 0.01% Triton X-100 and 5 mM DTT and incubated for 60 min at 37  $^{\circ}\text{C}$ . A 10 mM stock solution of the fluorogenic substrate Cbz-Phe-Arg-AMC was prepared in DMSO. The assay was performed with a final substrate concentration of 40  $\mu\text{M}$  ( $= 0.74 K_m$ ) and a final concentration of 42 ng/mL of cathepsin S. Into a cuvette containing 920  $\mu\text{L}$  assay buffer, inhibitor solution and DMSO in a total volume of 16  $\mu\text{L}$ , and 4  $\mu\text{L}$  of the substrate solution were added and thoroughly mixed. The reaction was initiated by adding 60  $\mu\text{L}$  of the cathepsin S solution. All measurements were done with a Monaco Safas spectrofluorometer flx, except for experiments with compounds **14** and **15**, which were performed on a PlateReader FLUOstar Optima with a total volume of 200  $\mu\text{L}$ . The reactions were followed at 25  $^{\circ}\text{C}$  over 20 min.

**Cathepsin L inhibition assay.**<sup>2</sup> Assay buffer was 100 mM sodium phosphate buffer pH 6.0, 100 mM NaCl, 5 mM EDTA, and 0.01% Brij 35. A stock solution of human isolated cathepsin L (Enzo Life Sciences, Lörrach, Germany) of 135 µg/mL in 20 mM malonate buffer pH 5.5, 400 mM NaCl, and 1 mM EDTA was diluted 1:100 with assay buffer containing 5 mM DTT and incubated for 30 min at 37 °C. A 10 mM stock solution of the chromogenic substrate Cbz-Phe-Arg-pNA was prepared with DMSO. The final concentration of the substrate was 100 µM (= 5.88  $K_m$ ). Assays were performed with a final concentration of 54 ng/mL of cathepsin L. Into a cuvette containing 940 µL assay buffer, inhibitor solution and DMSO in a total volume of 10 µL, and 10 µL of the substrate solution were added and thoroughly mixed. The reaction was initiated by adding 40 µL of the cathepsin L solution. The reactions were followed at 37 °C over 20 min

**Cathepsin K inhibition assay.**<sup>2</sup> A human recombinant cathepsin K (Enzo Life Sciences, Lörrach, Germany) stock solution of 23 µg/mL in 50 mM sodium acetate pH 5.5, 50 mM NaCl, 0.5 mM EDTA, 5 mM DTT was diluted 1:100 with assay buffer (100 mM sodium citrate pH 5.0, 100 mM NaCl, 1 mM EDTA, 0.01% CHAPS) containing 5 mM DTT and incubated for 30 min at 37 °C. A 10 mM stock solution of the fluorogenic substrate Cbz-Leu-Arg-AMC was prepared with DMSO. The final concentration of the substrate was 40 µM (= 13.3  $K_m$ ). Assays were performed with a final concentration of 5 ng/mL of cathepsin K. Into a cuvette containing 960 µL assay buffer, inhibitor solution and DMSO in a total volume of 16 µL, and 4 µL of the substrate solution were added and thoroughly mixed. The reaction was initiated by adding 20 µL of the cathepsin K solution. All measurements were done with a Monaco Safas spectrofluorometer flx, except for experiments with compounds **14** and **15**, which were performed on a PlateReader FLUOstar Optima with a total volume of 200 µL. The reactions were followed at 25 °C over 20 min.

## References

- [1] Frizler, M.; Lohr, F.; Lülldorff, M.; Gütschow, M. Facing the gem-dialkyl effect in enzyme inhibitor design: preparation of homocycloleucine-based azadipeptide nitriles. *Chem. Eur. J.* **2011**, *17*, 11419-11423.
- [2] Frizler, M.; Lohr, F.; Furtmann, N.; Kläs, J.; Gütschow, M. Structural optimization of azadipeptide nitriles strongly increases association rates and allows the development of selective cathepsin inhibitors. *J. Med. Chem.* **2011**, *54*, 396-400.
- [3] Löser, R.; Gütschow, M. Dipeptide-derived nitriles containing additional electrophilic sites: potentially irreversible inhibitors of cysteine proteases. *J. Enzyme Inhib. Med. Chem.* **2009**, *24*, 1245-1252.
- [4] Löser, R.; Schilling, K.; Dimmig, E.; Gütschow, M. Interaction of papain-like cysteine proteases with dipeptide-derived nitriles. *J. Med. Chem.* **2005**, *48*, 7688-7707.
- [5] Schmitz, J.; Furtmann, N.; Ponert, M.; Frizler, M.; Löser, R.; Bartz, U.; Bajorath, J.; Gütschow, M. Active site mapping of human cathepsin F with dipeptide nitrile inhibitors. *ChemMedChem.* **2015**, *10*, 1365-1377.
- [6] Mertens, M. D.; Schmitz, J.; Horn, M.; Furtmann, N.; Bajorath, J.; Mareš, M.; Gütschow, M. A coumarin-labeled vinyl sulfone as tripeptidomimetic activity-based probe for cysteine cathepsins. *ChemBioChem.* **2014**, *15*, 955-959.

# $^1\text{H}$ and $^{13}\text{C}$ NMR Spectra

## (S)-N-(tert-Butyloxycarbonyl)-2-naphthylalanyl-glycine nitrile (1)

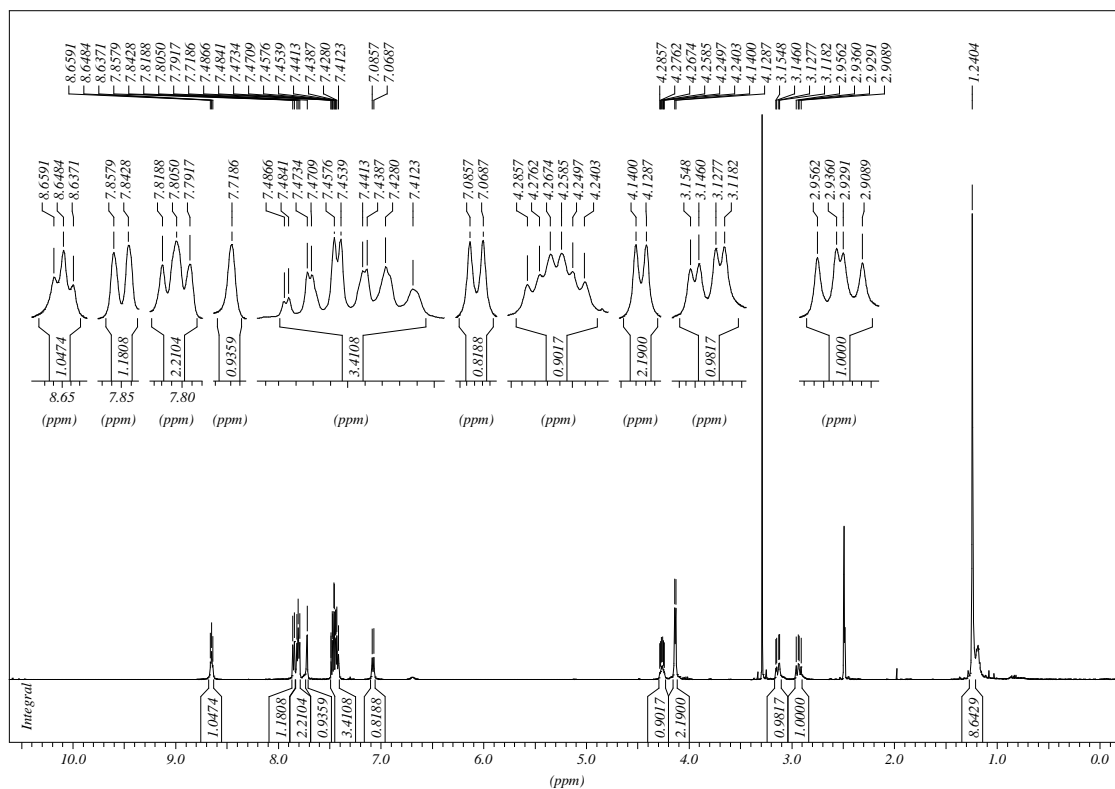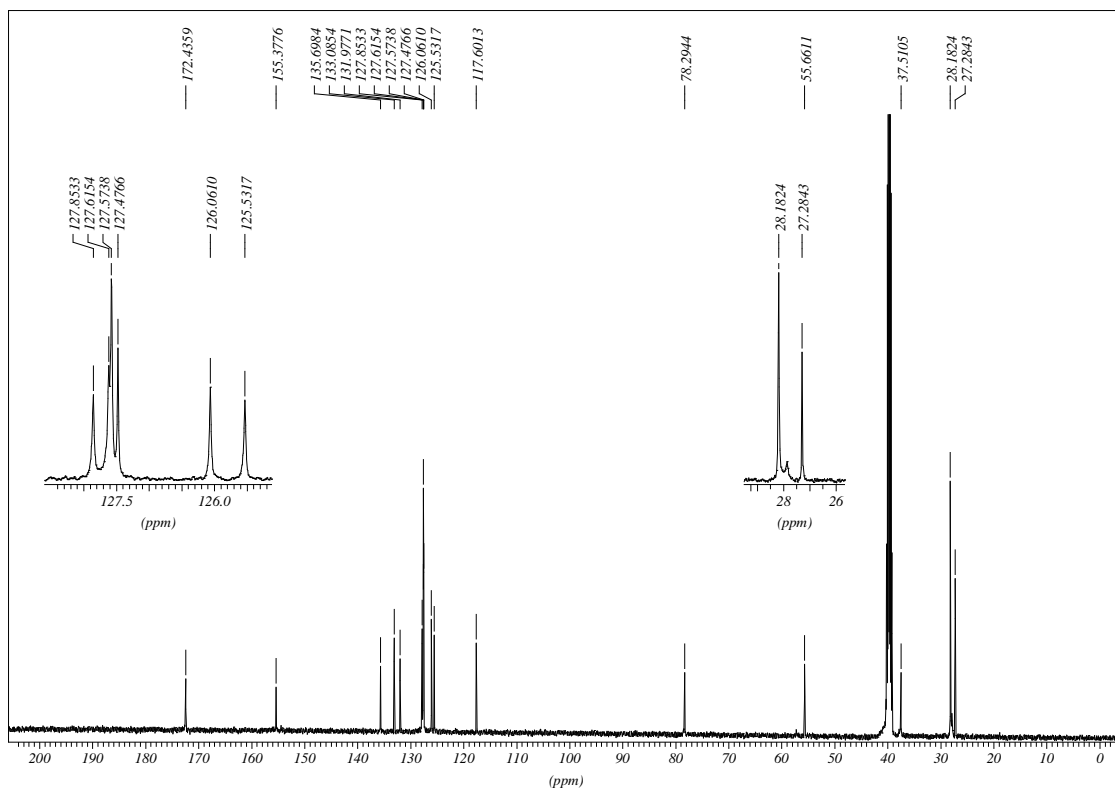



**(S)-N-(tert-Butyloxycarbonyl)-3-bromophenylalanyl-glycine nitrile (2)**

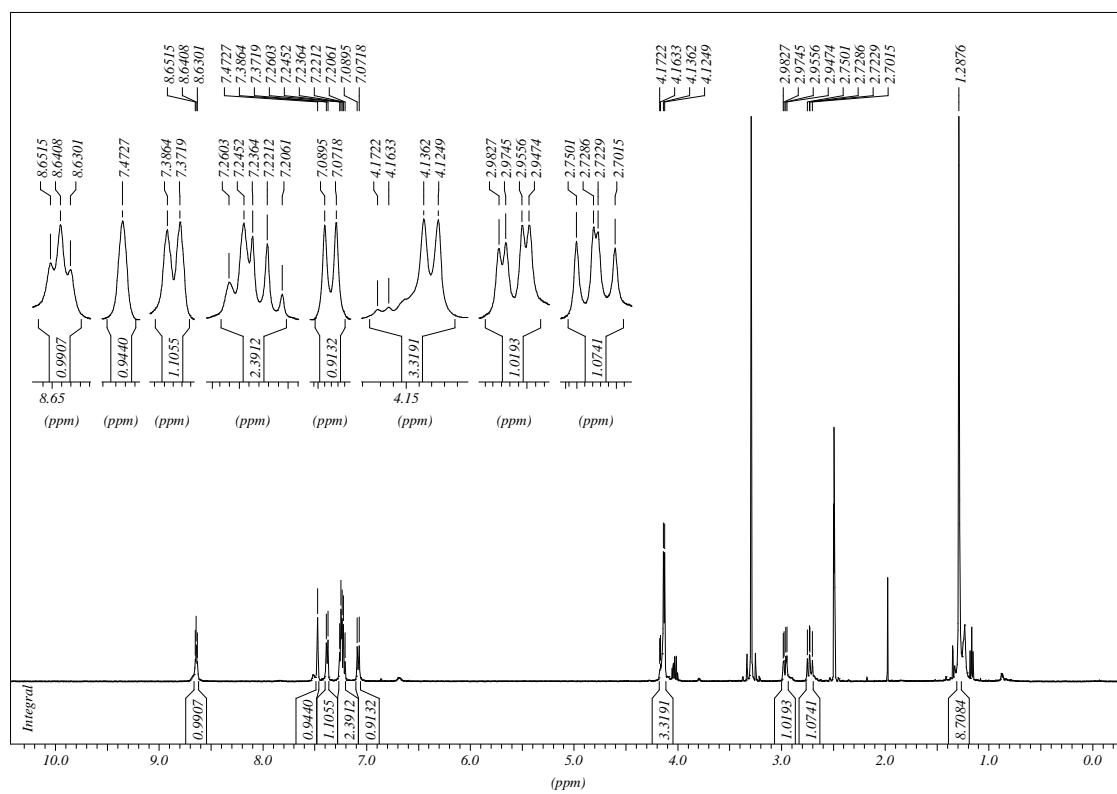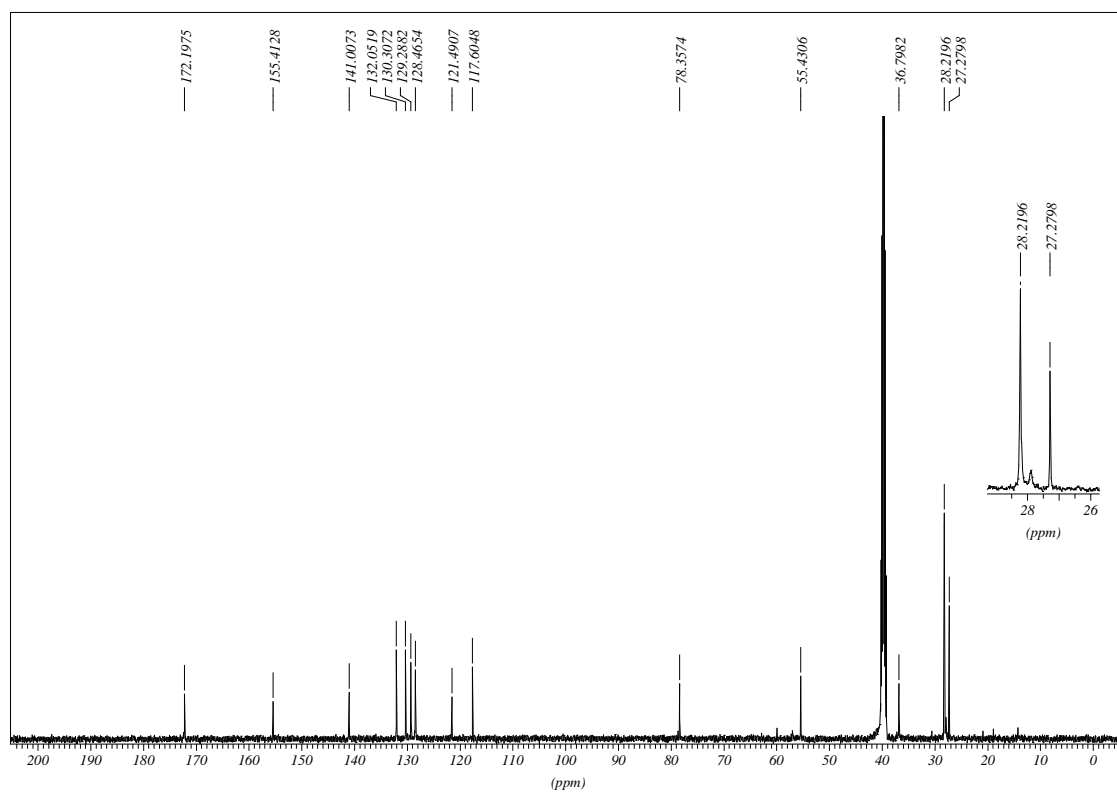

**(S)-N-(4-Phenylbenzoyl)-2-naphthylalanyl-glycine nitrile (9)**

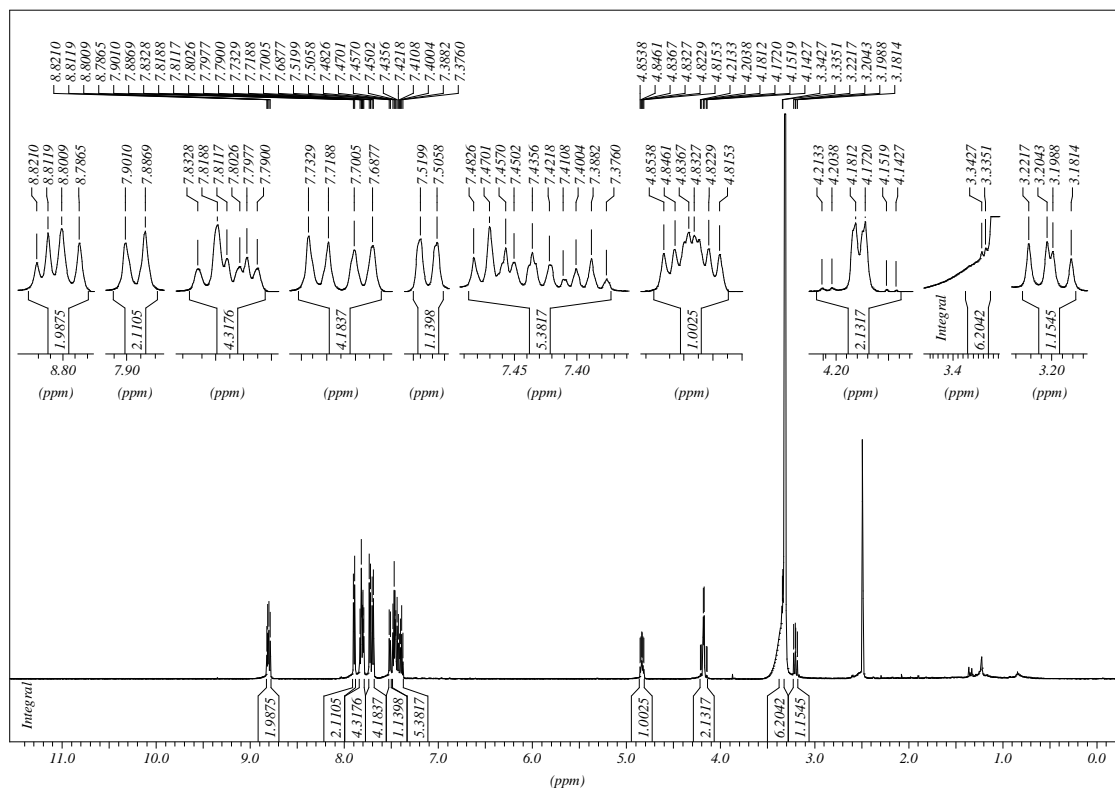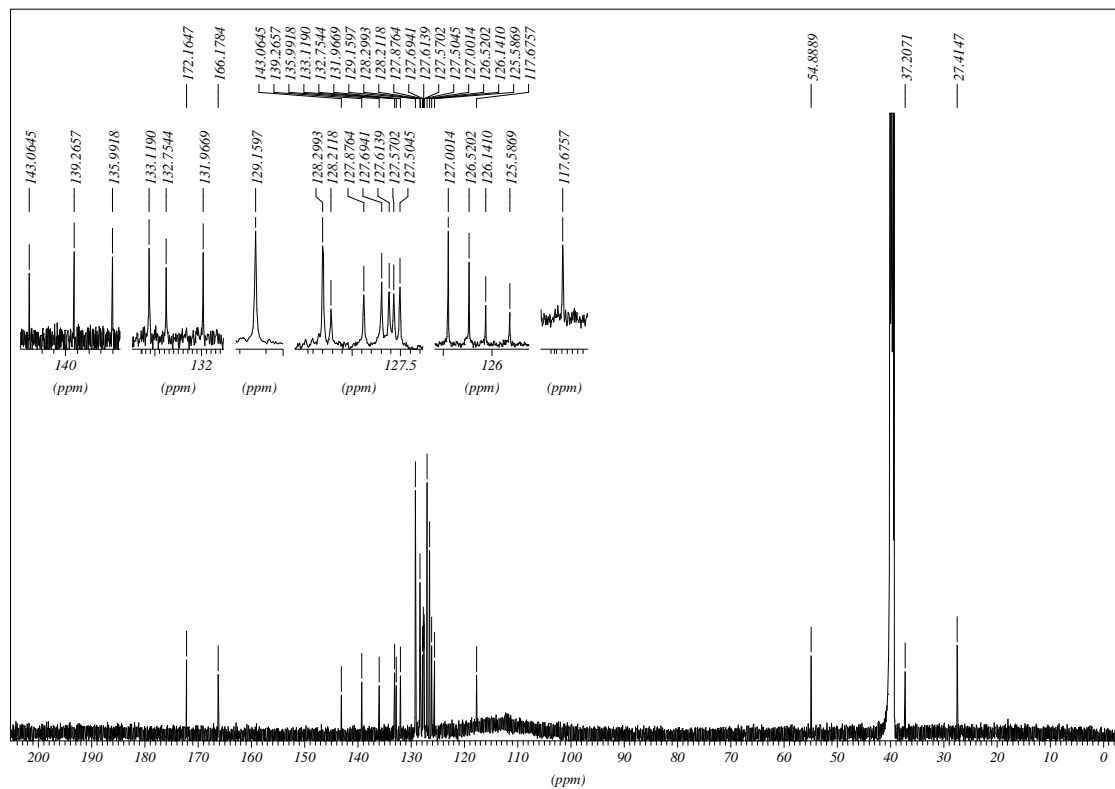

**(S)-N-(4-Phenylbenzoyl)-3-bromophenylalanyl-glycine nitrile (10)**

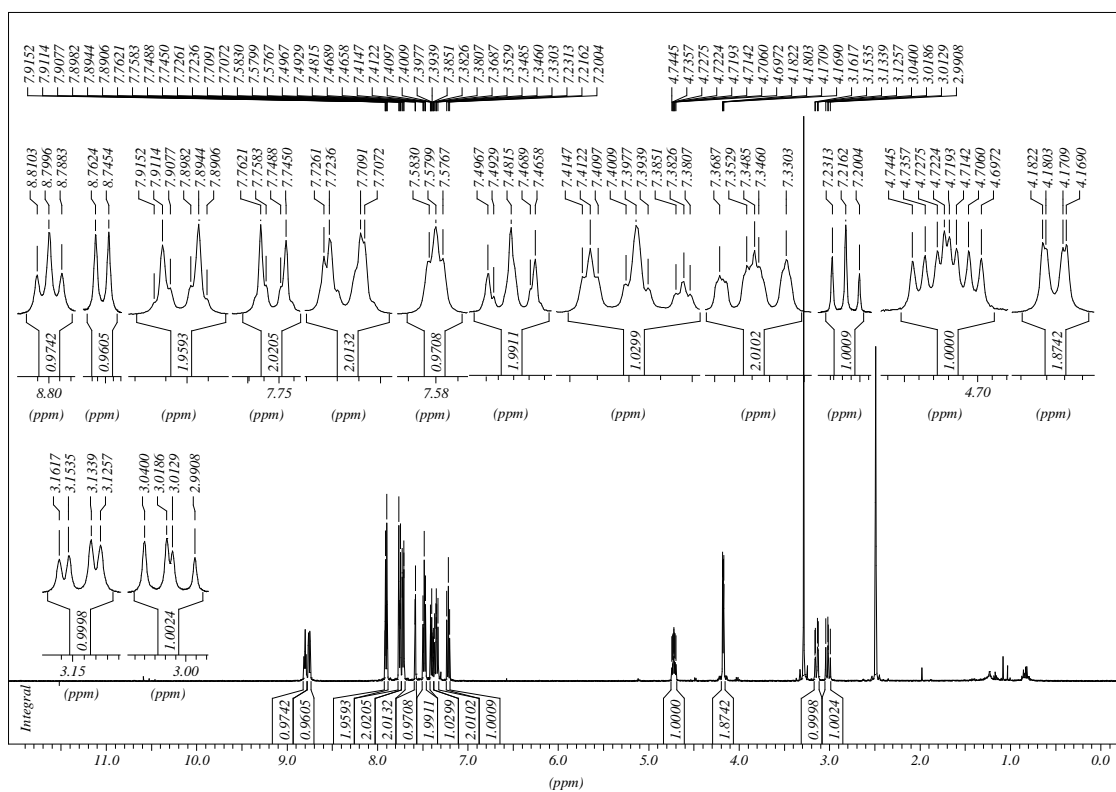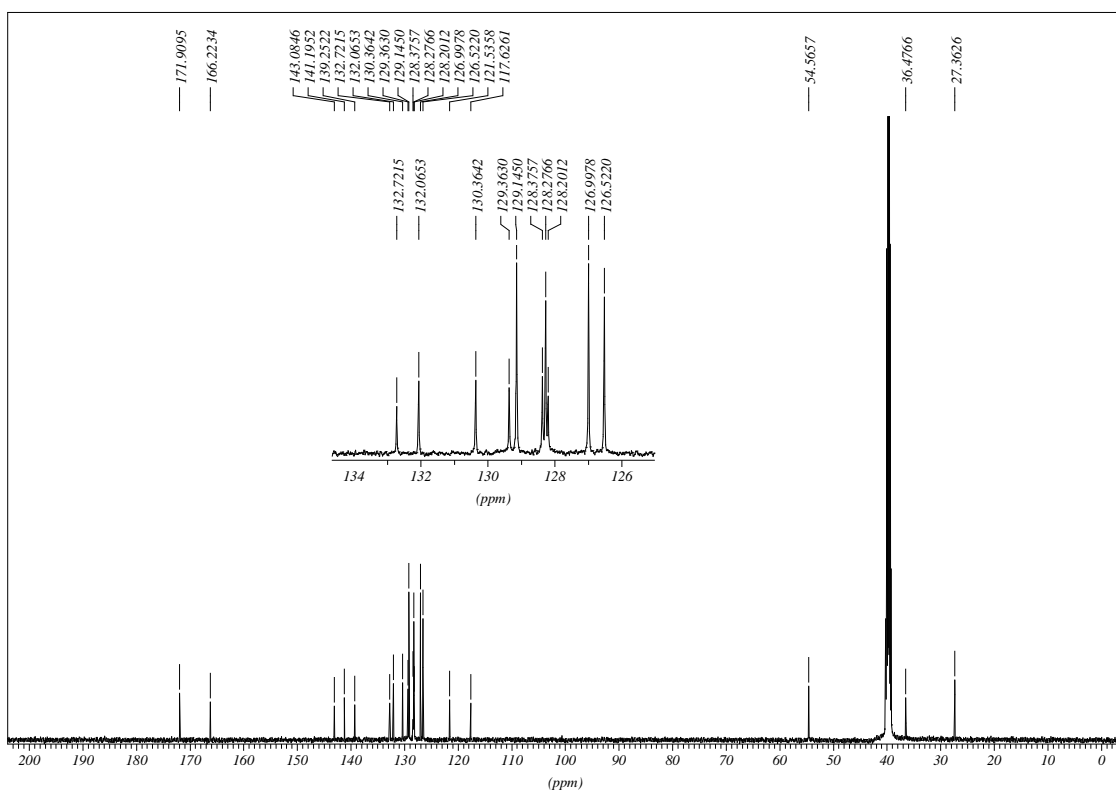

**(S)-N-(4-Phenylbenzoyl)-3-biphenylalanyl-glycine nitrile (11)**

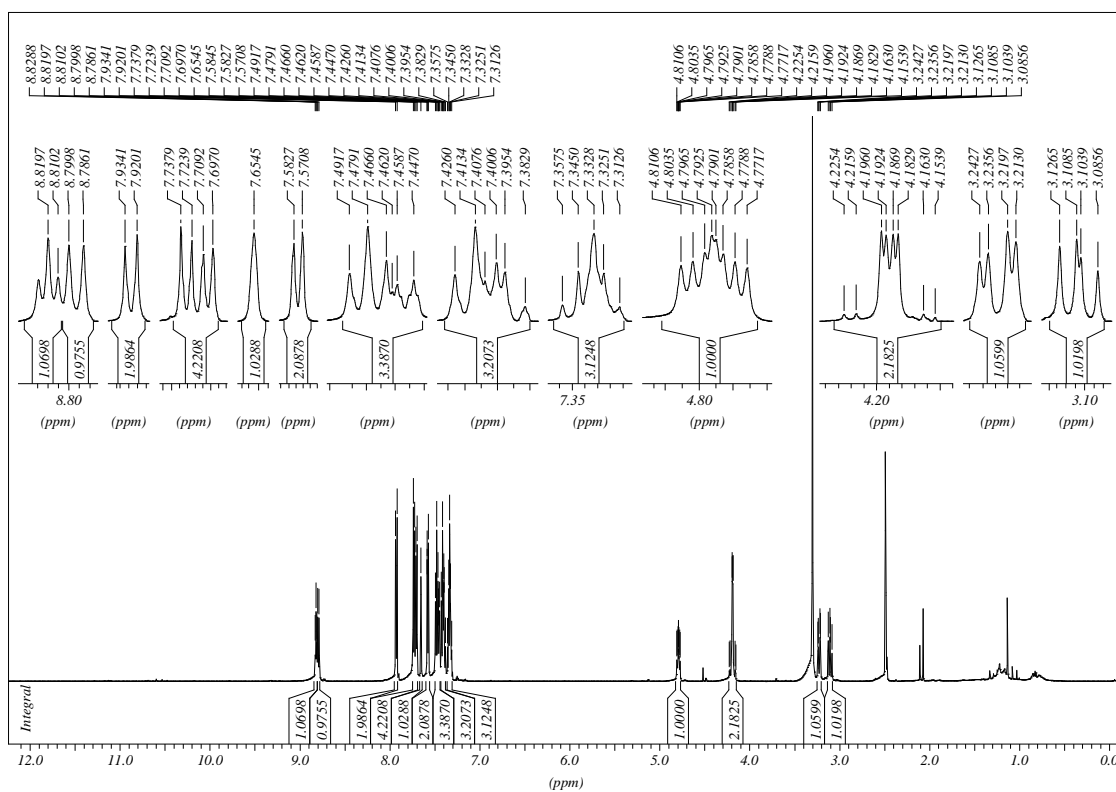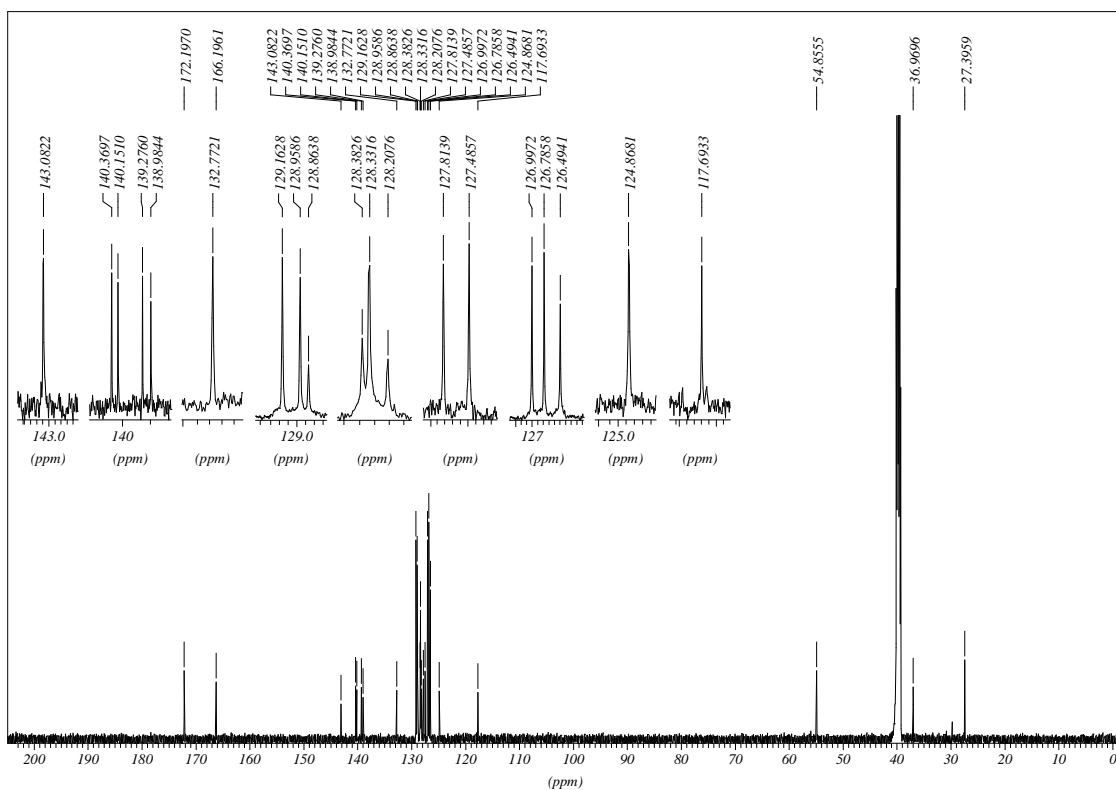

**(S)-N-(tert-Butyloxycarbonyl)-O-(propynyl)-serine amide (24)**

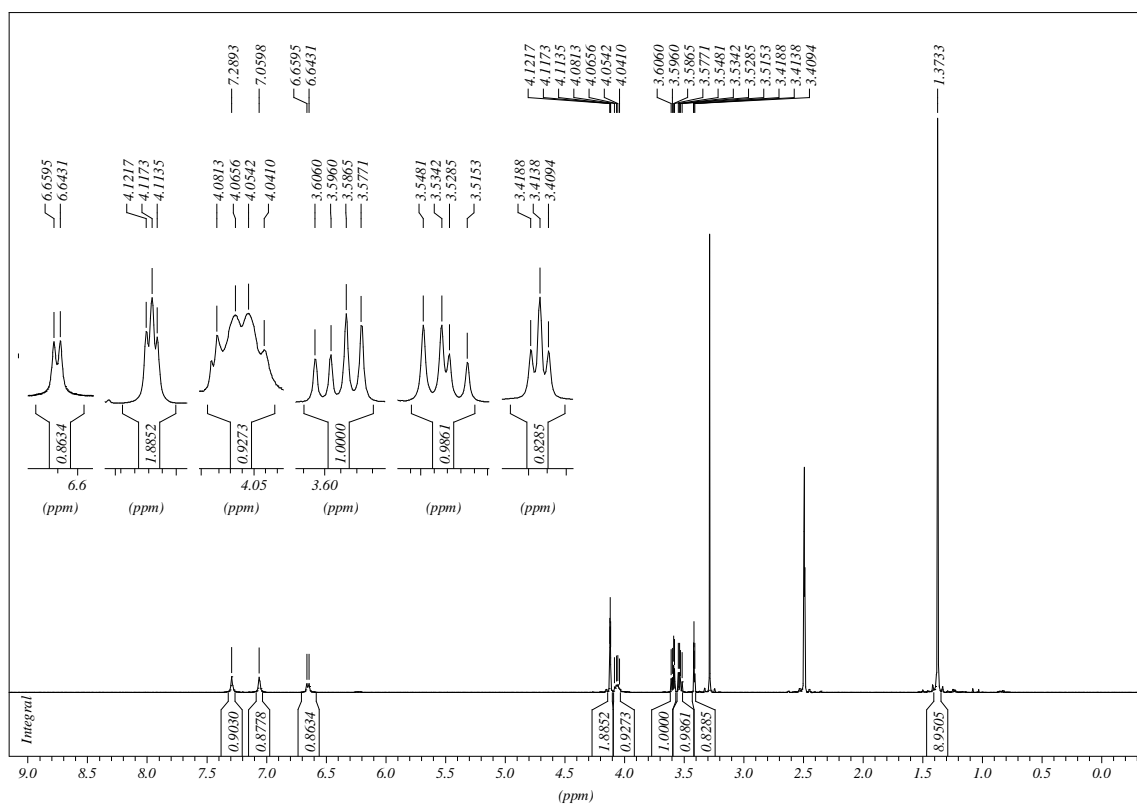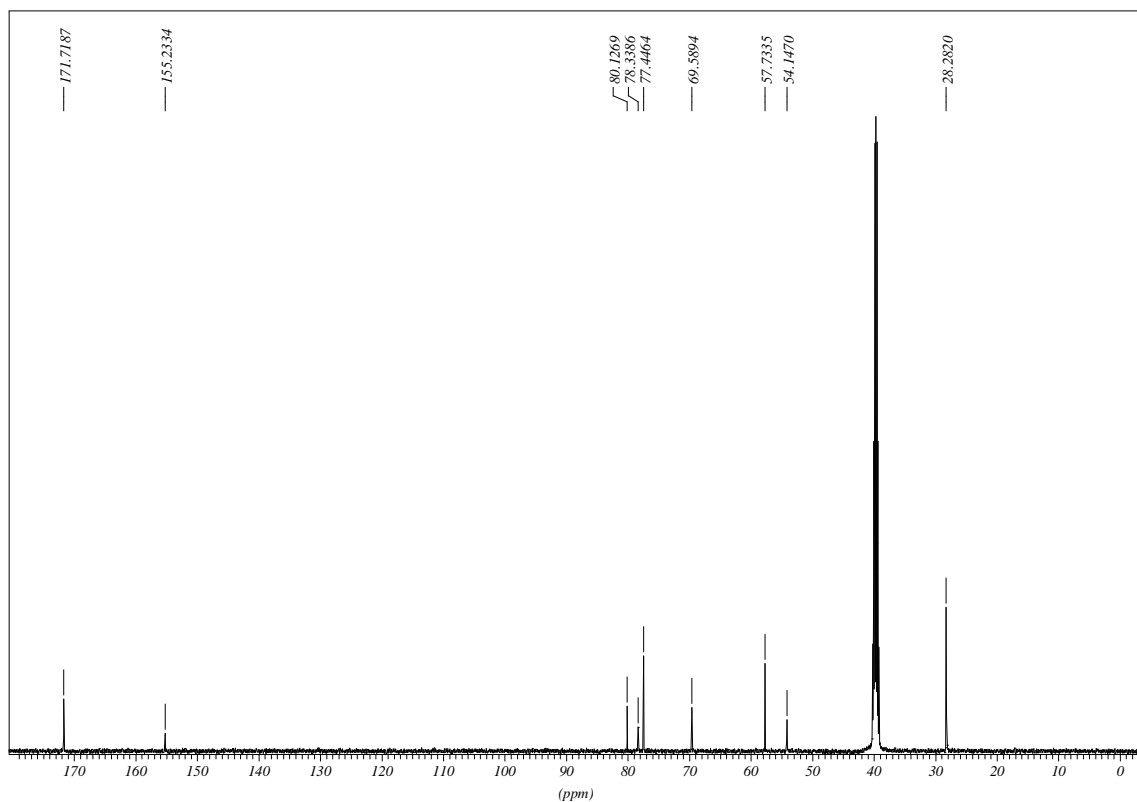

**(S,S)-N-(Benzyloxycarbonyl)-phenylalanyl-O-(propynyl)-serine amide (26)**

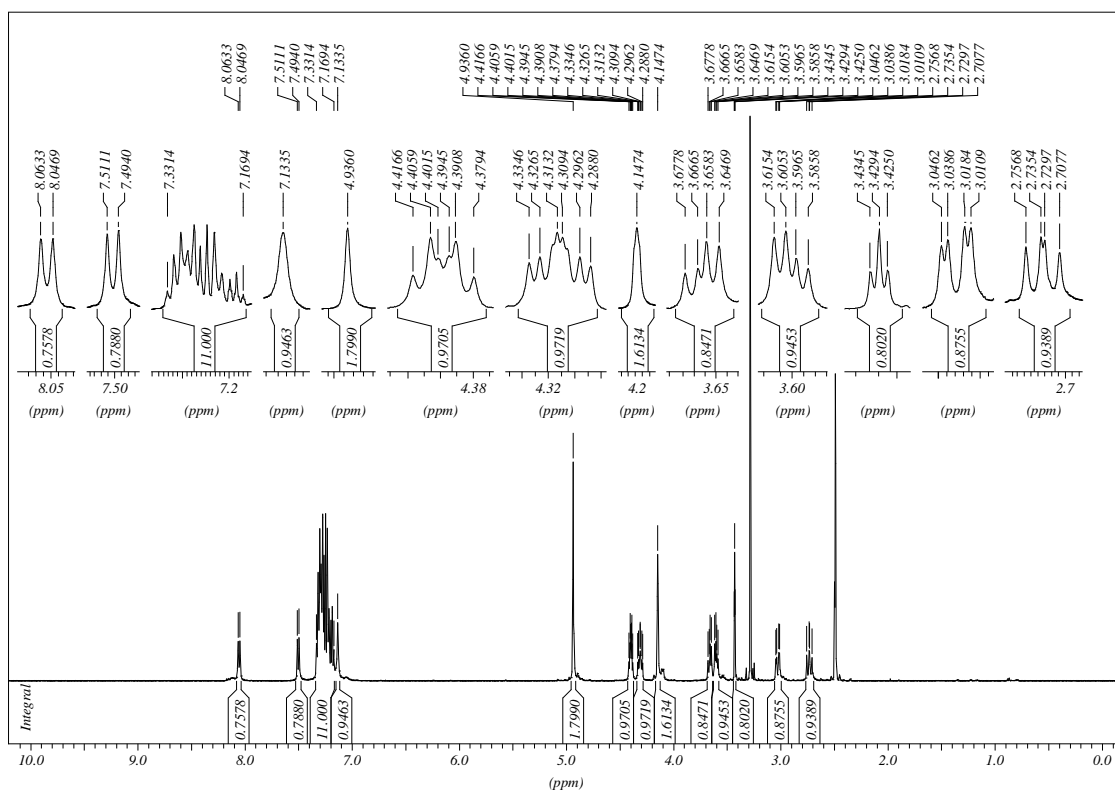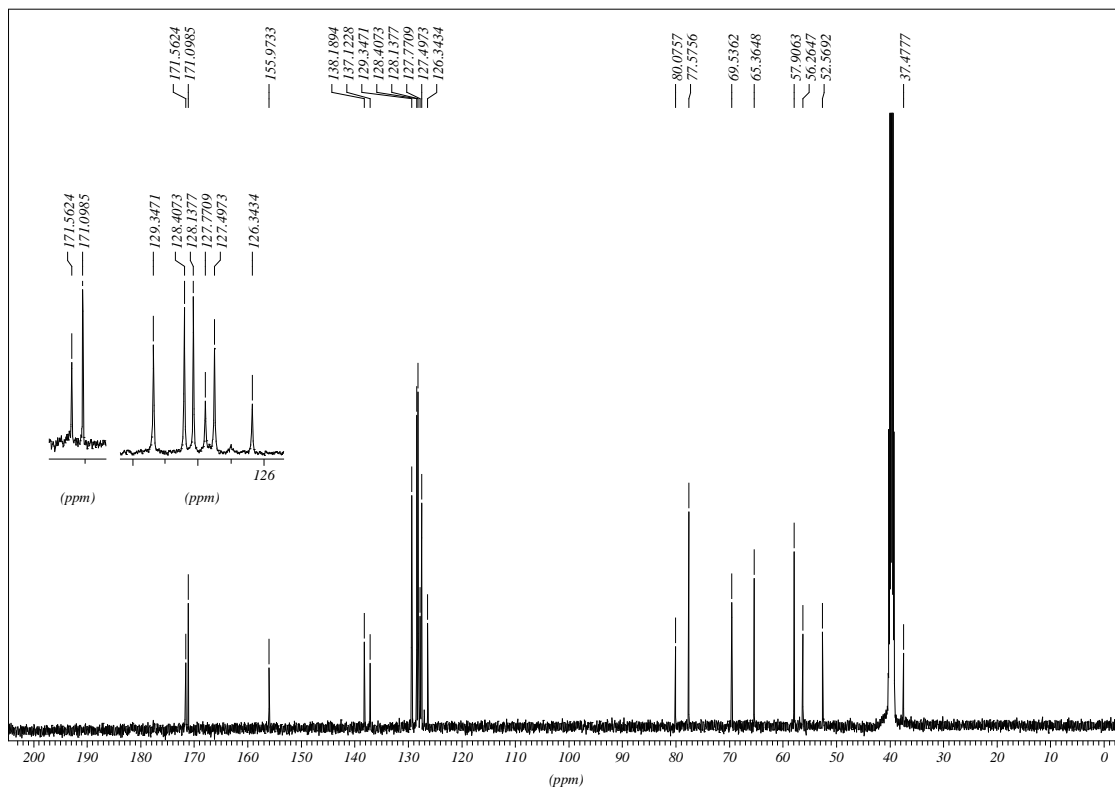

**(S,S)-N-(Benzyloxycarbonyl)-phenylalanyl-O-(propynyl)-serine nitrile (27)**

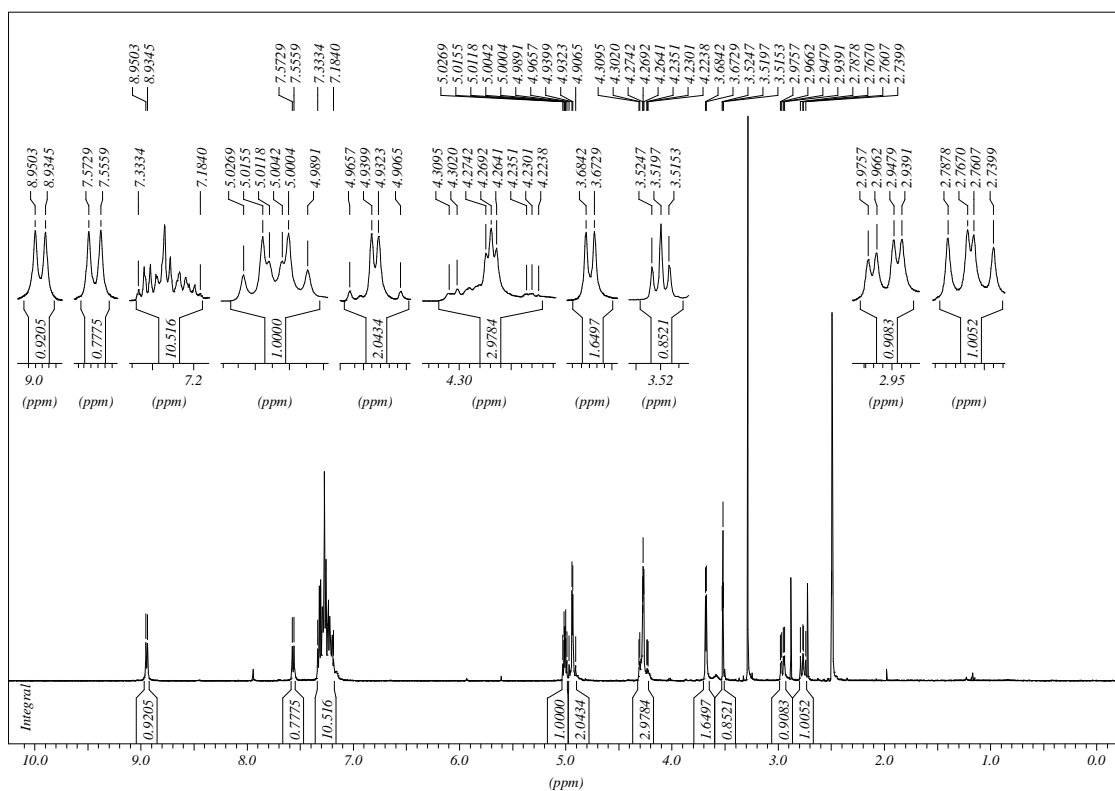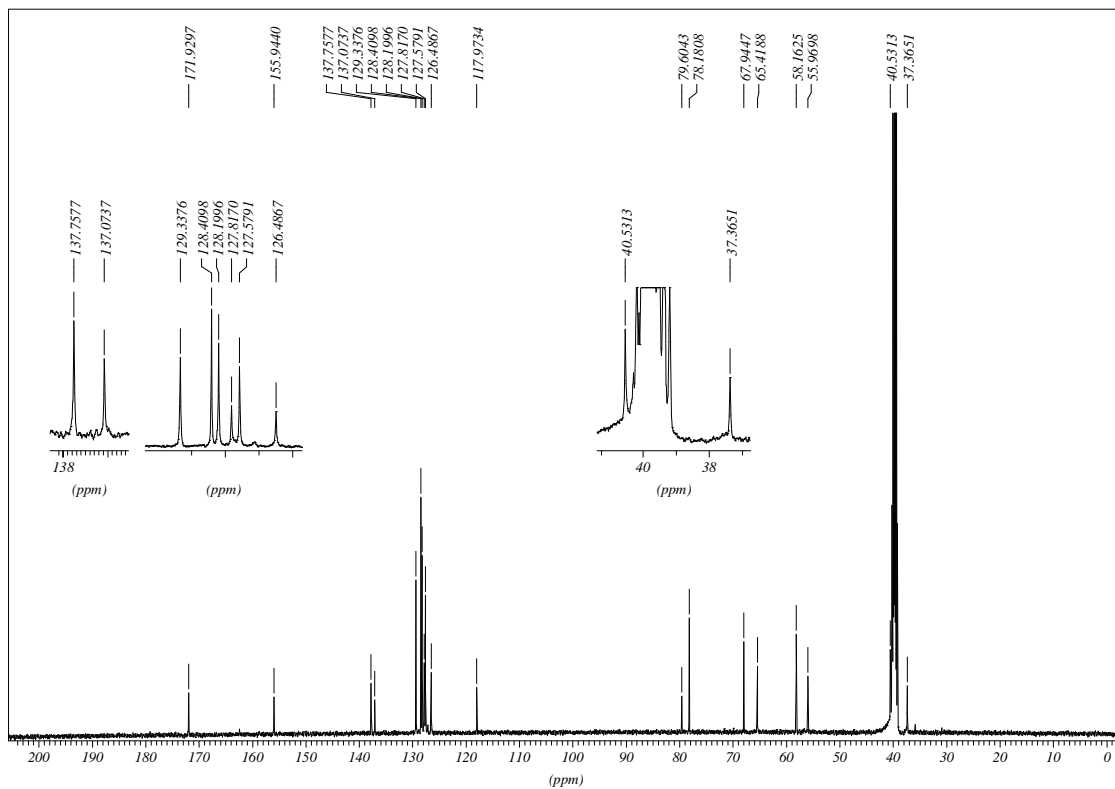

**(*S,S*)-*N*-(Benzyloxycarbonyl)-phenylalanyl-*O*-((1-(carboxymethyl)-1*H*-1,2,3-triazol-4-yl)methyl)-serine nitrile (12)**

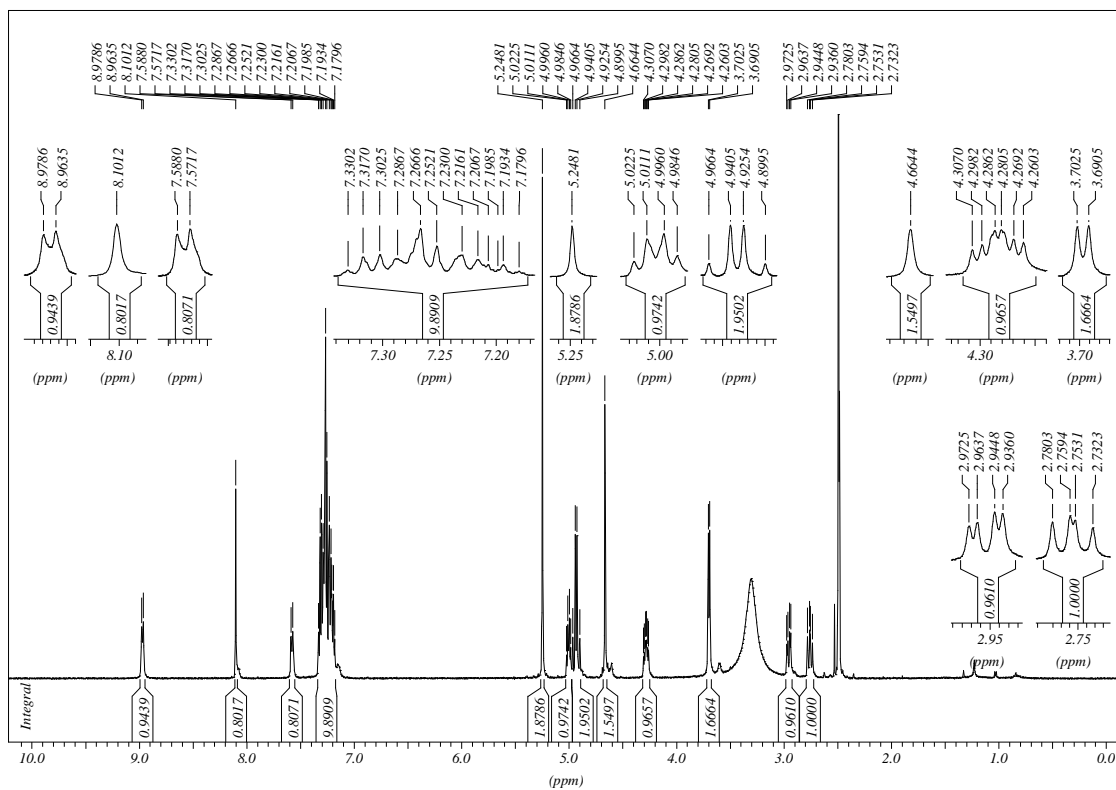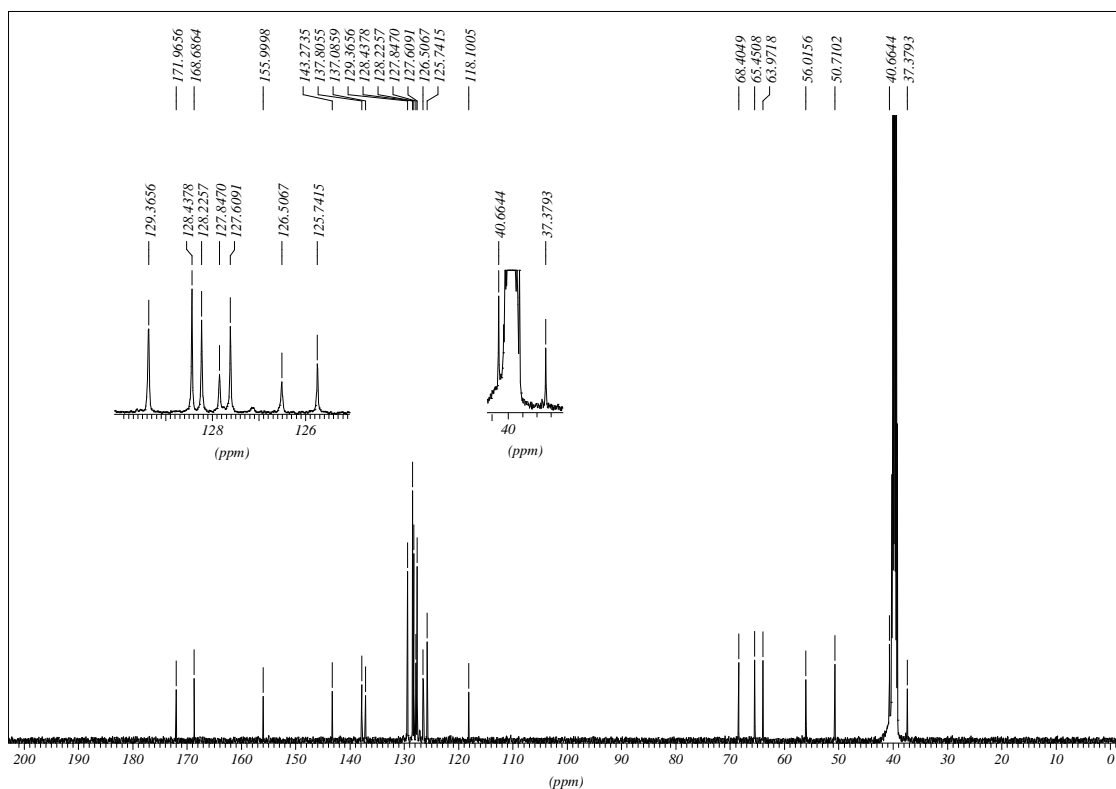



**(*S,S*)-*N*-(Benzyloxycarbonyl)-phenylalanyl-*O*-((1-(2-carboxyethyl)-1*H*-1,2,3-triazol-4-yl)methyl)-serine nitrile (13)**

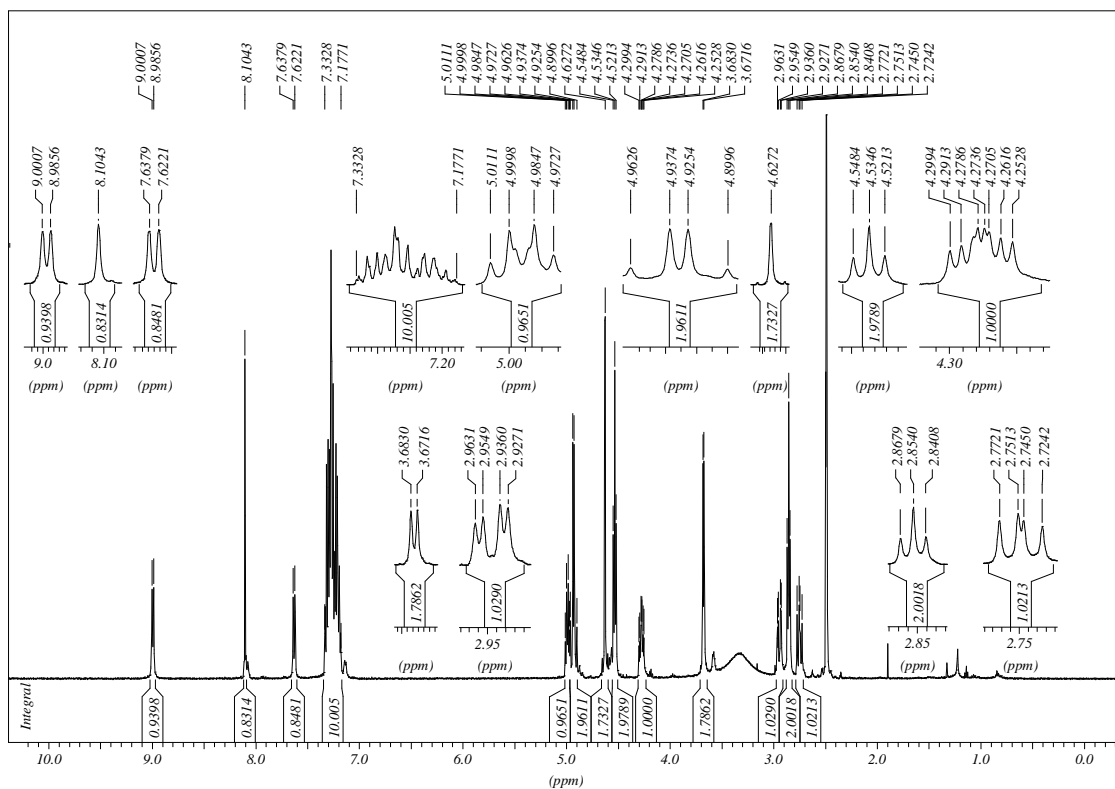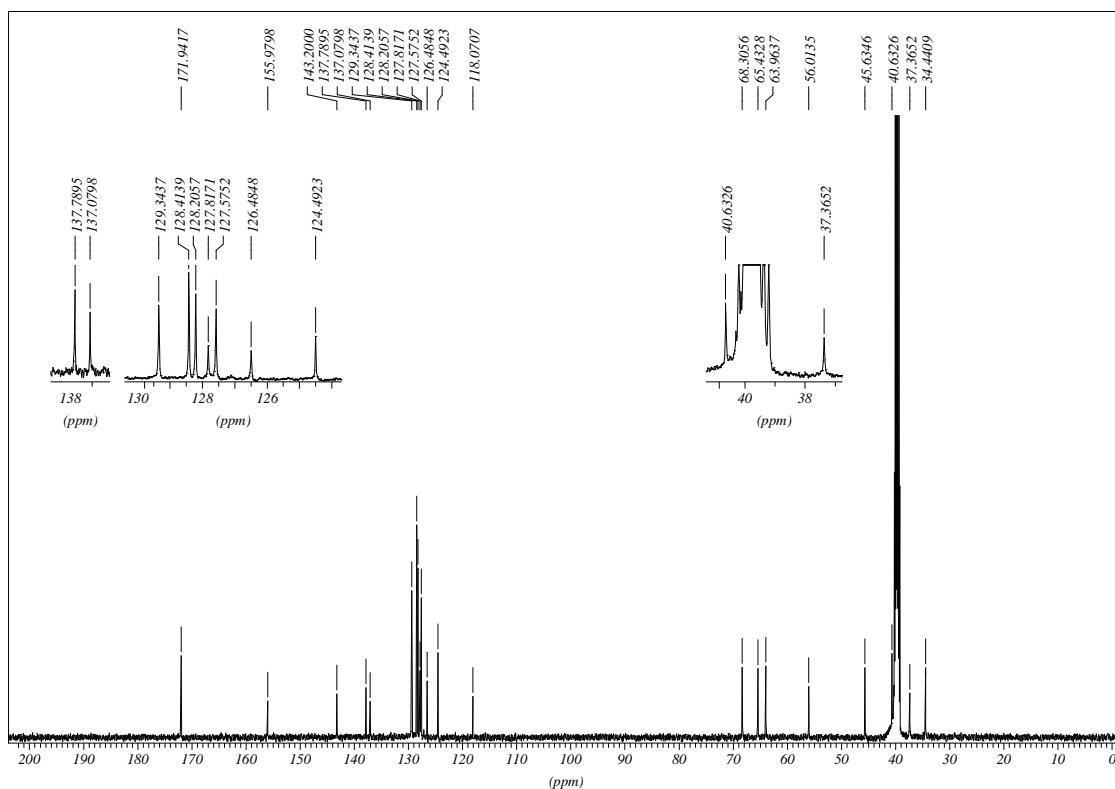

**(S)-N-(tert-Butyloxycarbonyl)-O-(propynyl)-homoserine amide (34)**

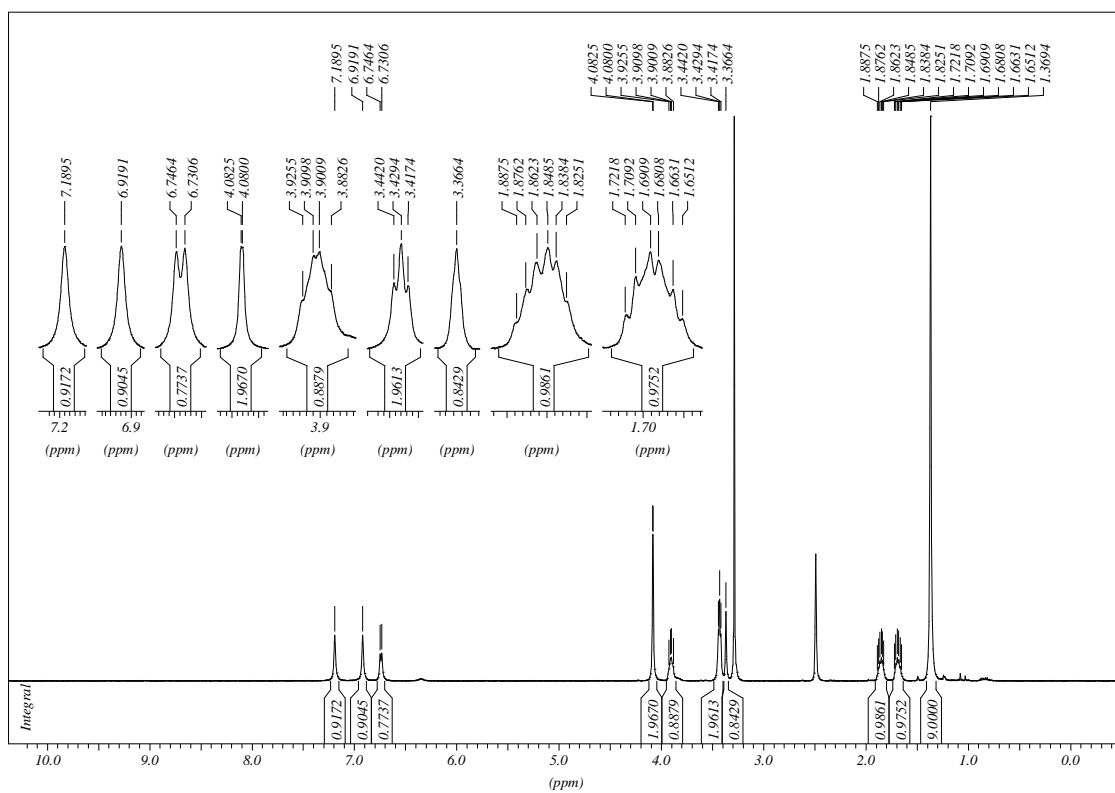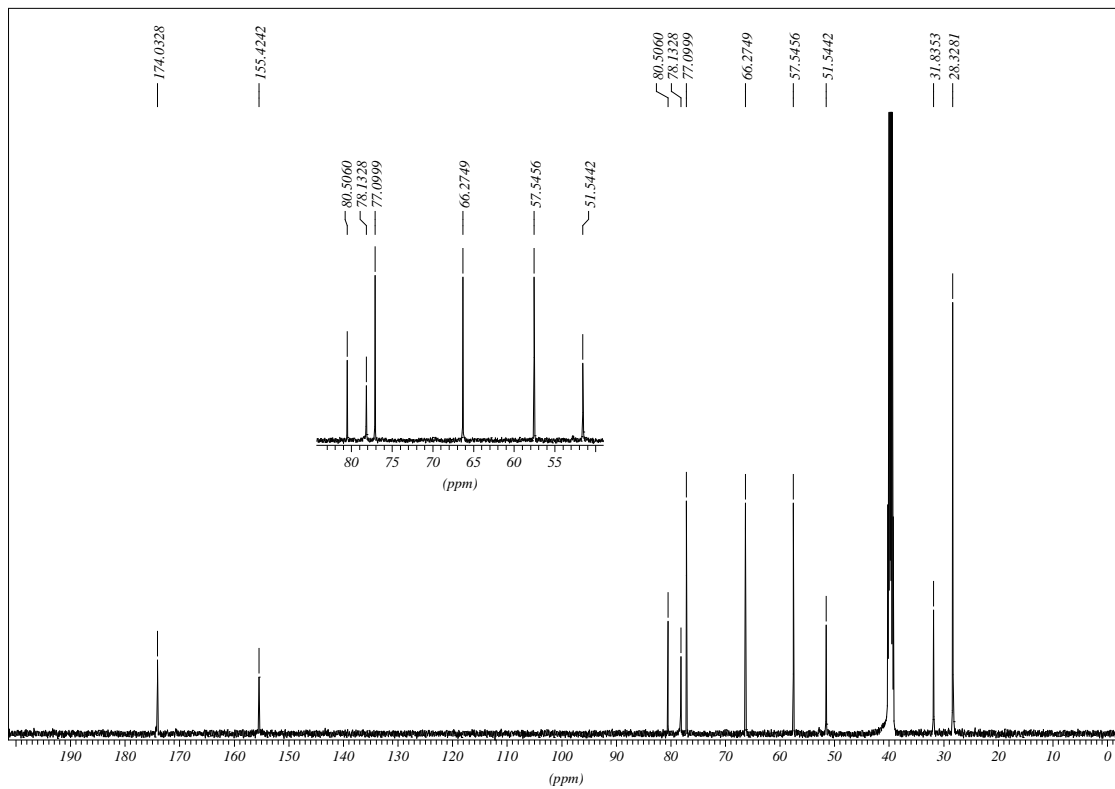

**(*S,S*)-*N*-(Benzyloxycarbonyl)-phenylalanyl-*O*-(propynyl)-homoserine amide (36)**

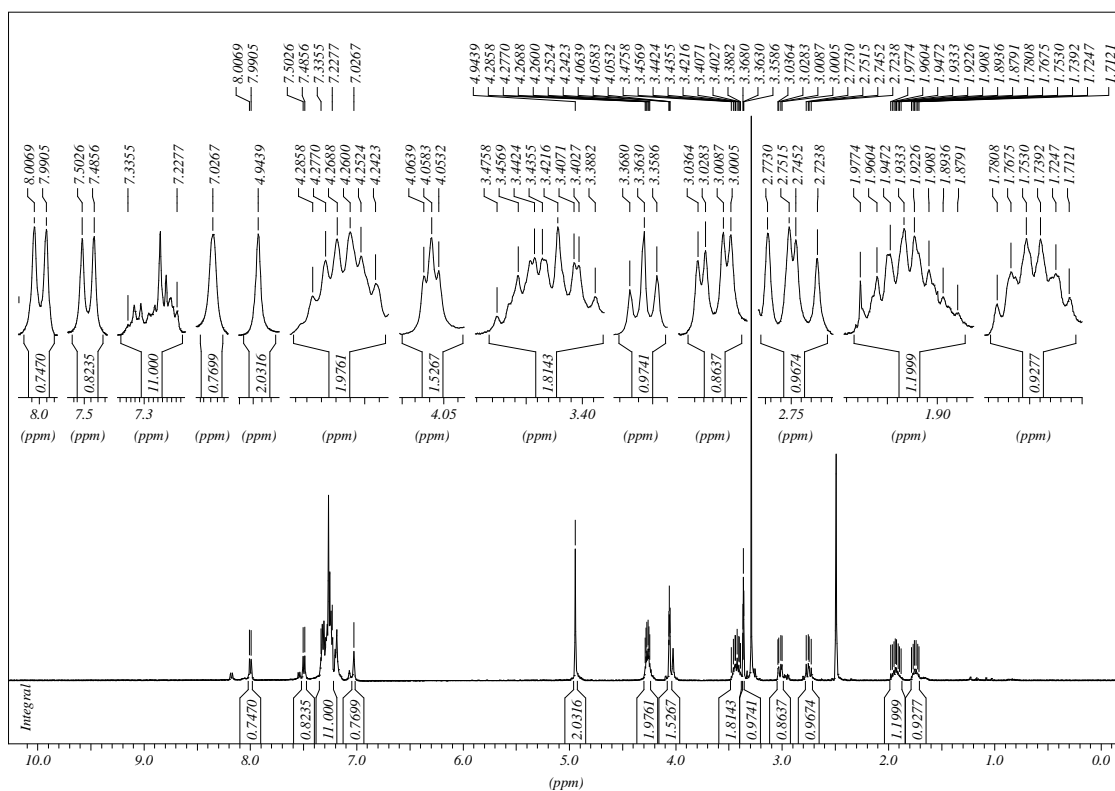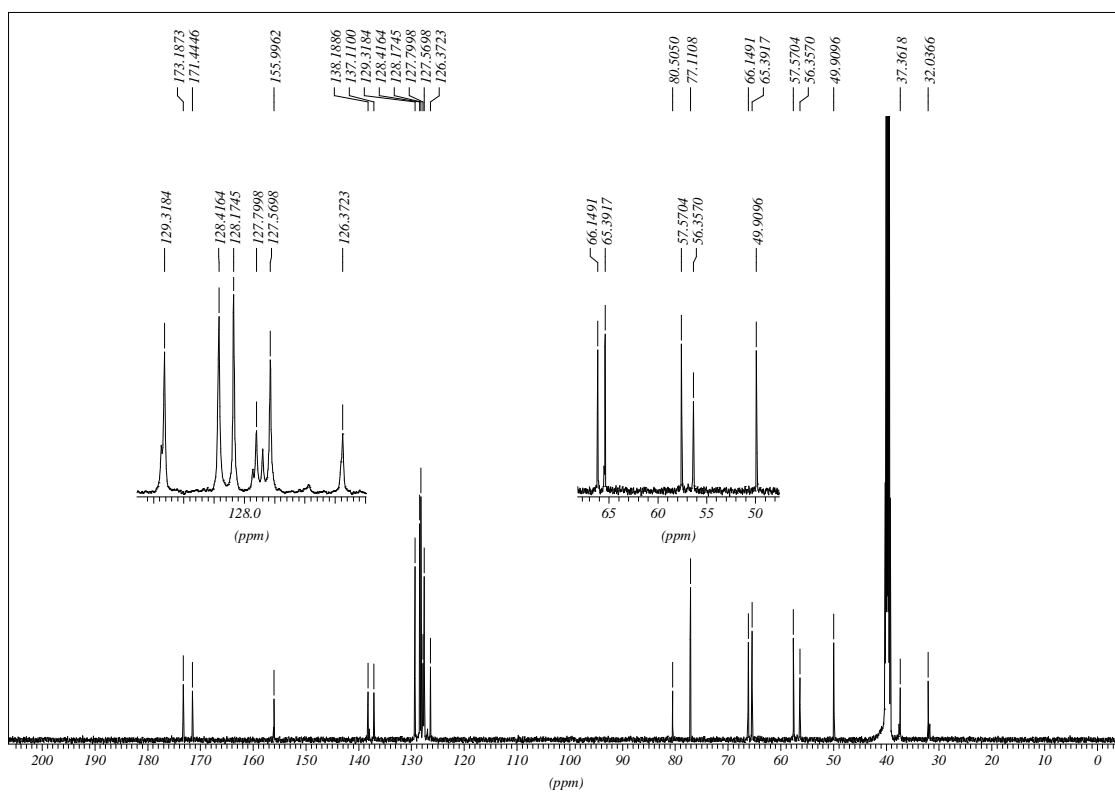

**(*S,S*)-*N*-(Benzyloxycarbonyl)-phenylalanyl-*O*-(propynyl)-homoserine nitrile (37)**

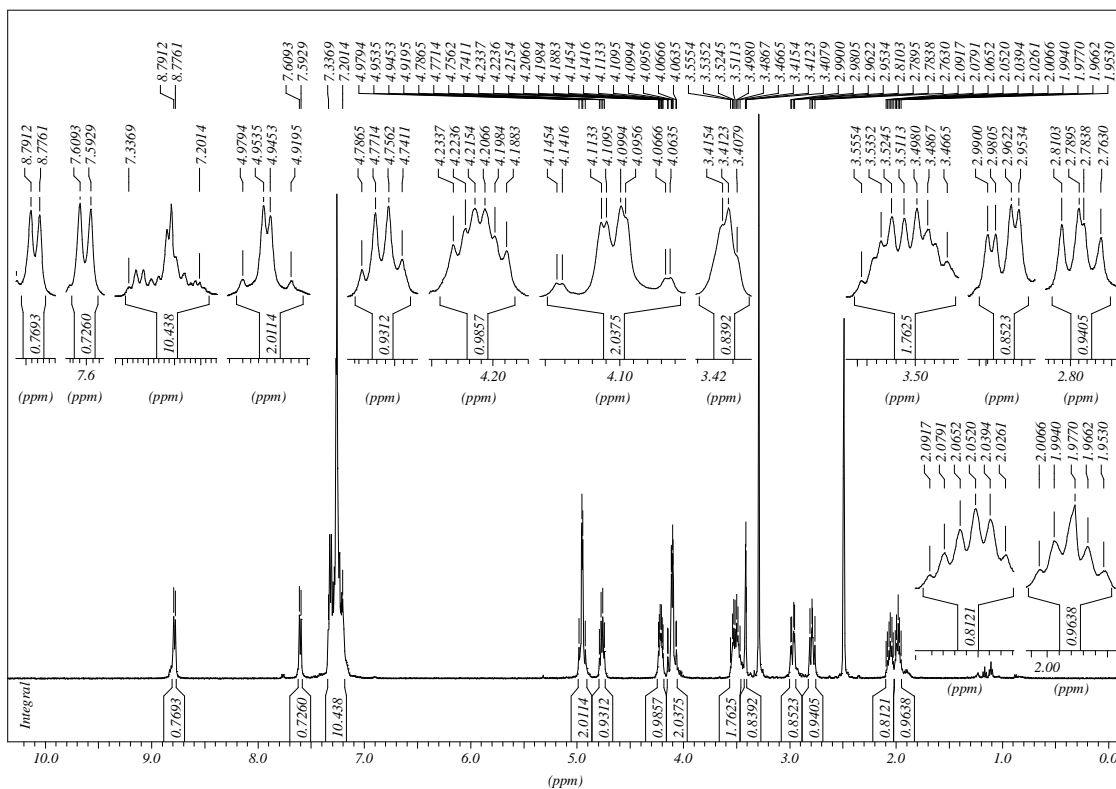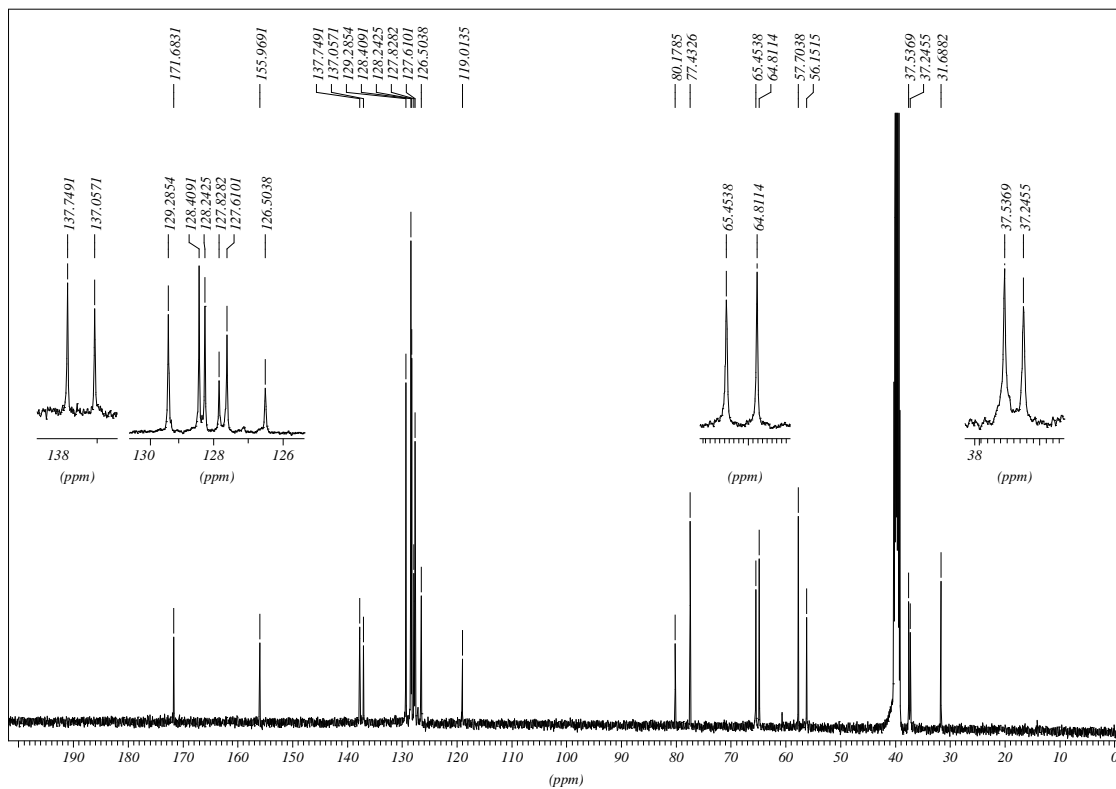

**(*S,S*)-*N*-(Benzyloxycarbonyl)-phenylalanyl-*O*-((1-(carboxymethyl)-1*H*-1,2,3-triazol-4-yl)methyl)-homoserine nitrile (14)**

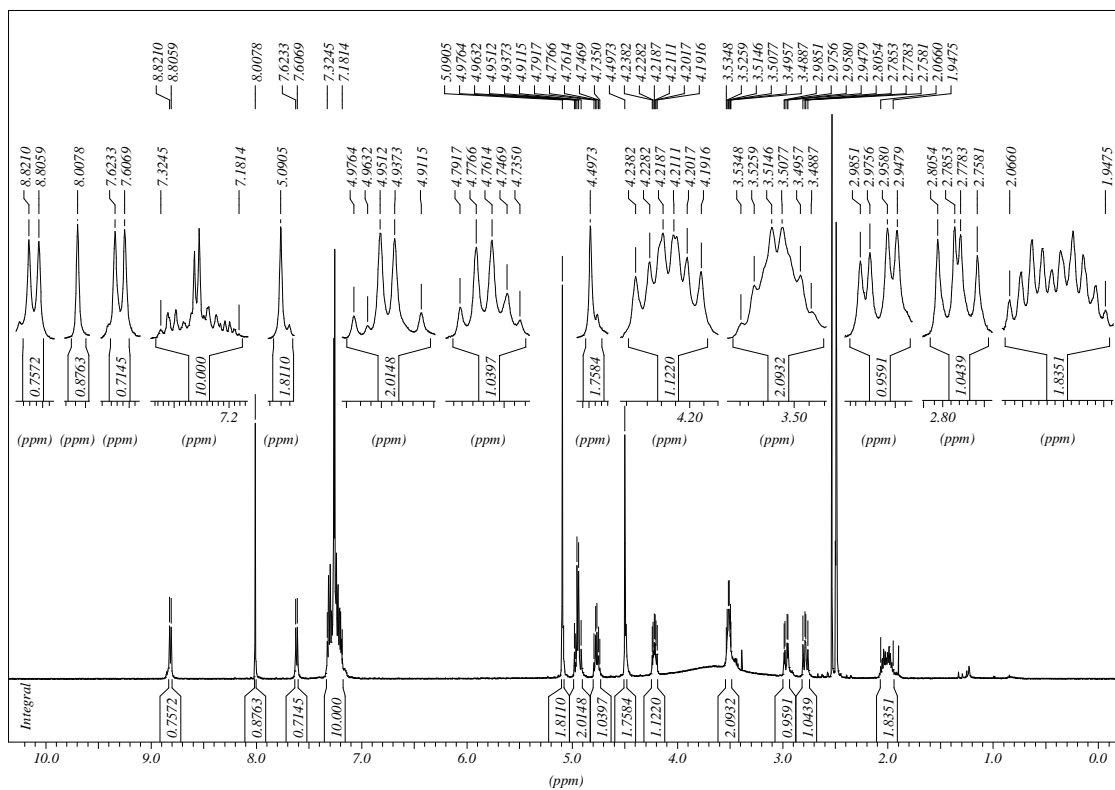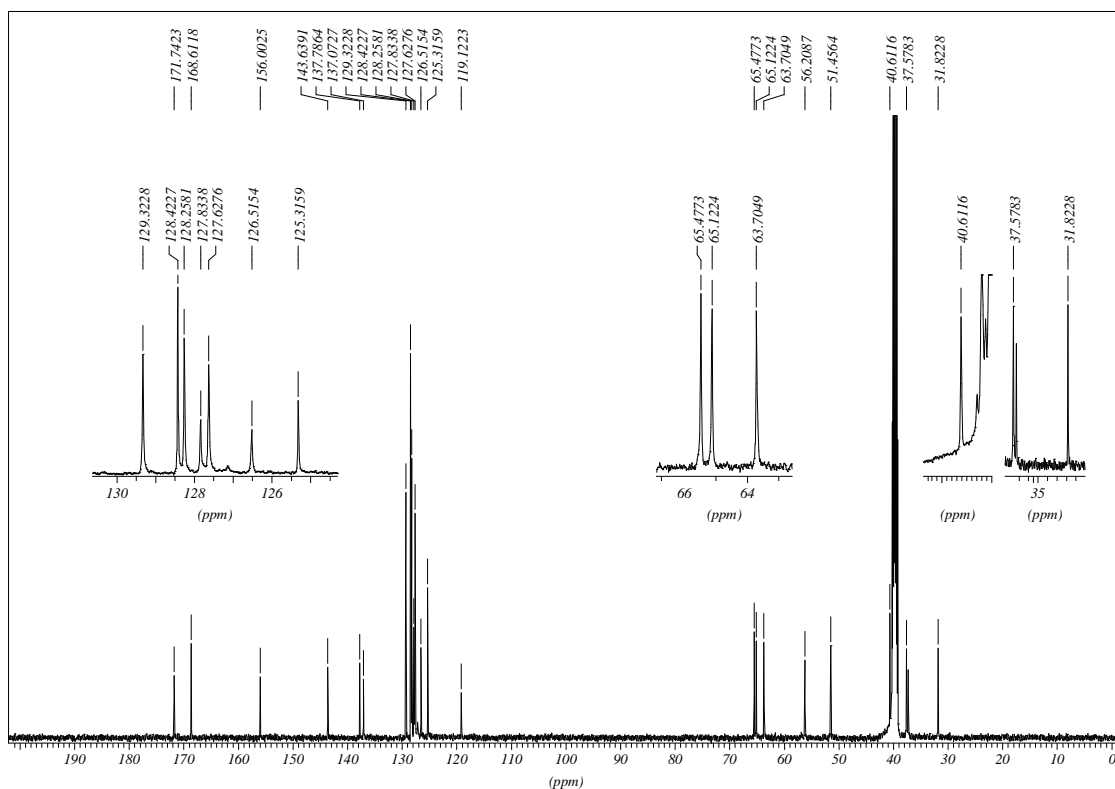

**(S,S)-N-(Benzyloxycarbonyl)-phenylalanyl-O-((1-(2-carboxyethyl)-1H-1,2,3-triazol-4-yl)methyl)-homoserine nitrile (15)**

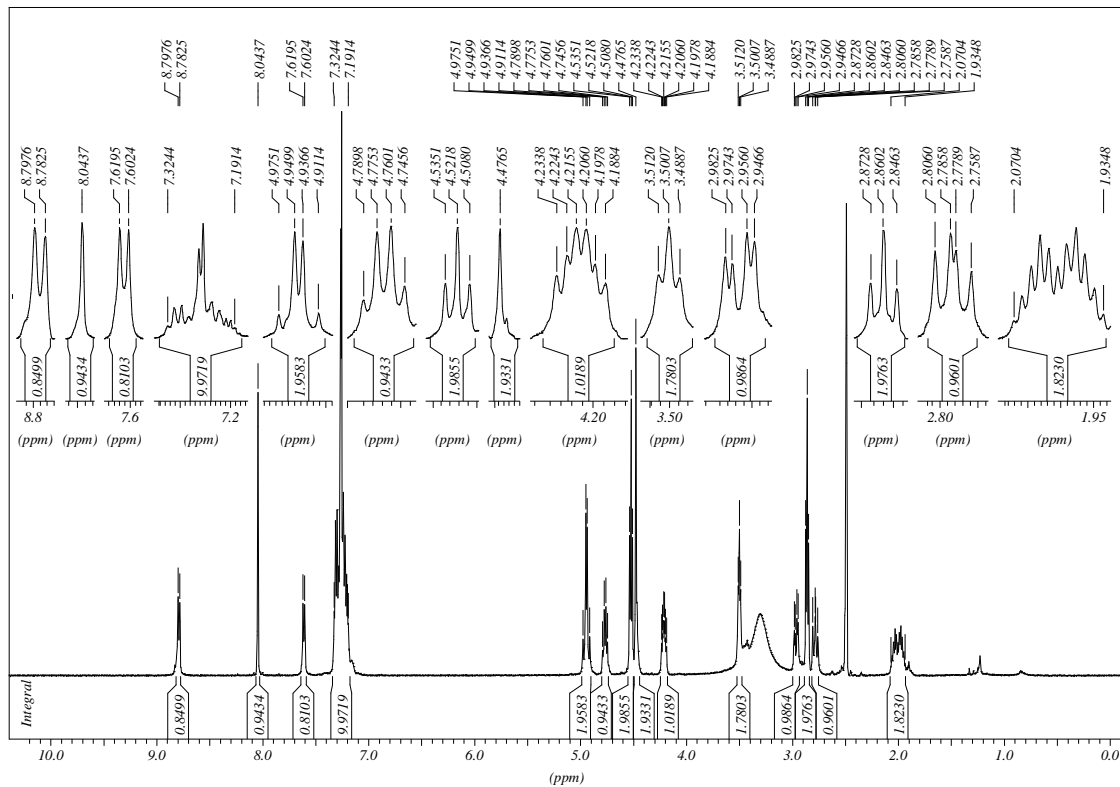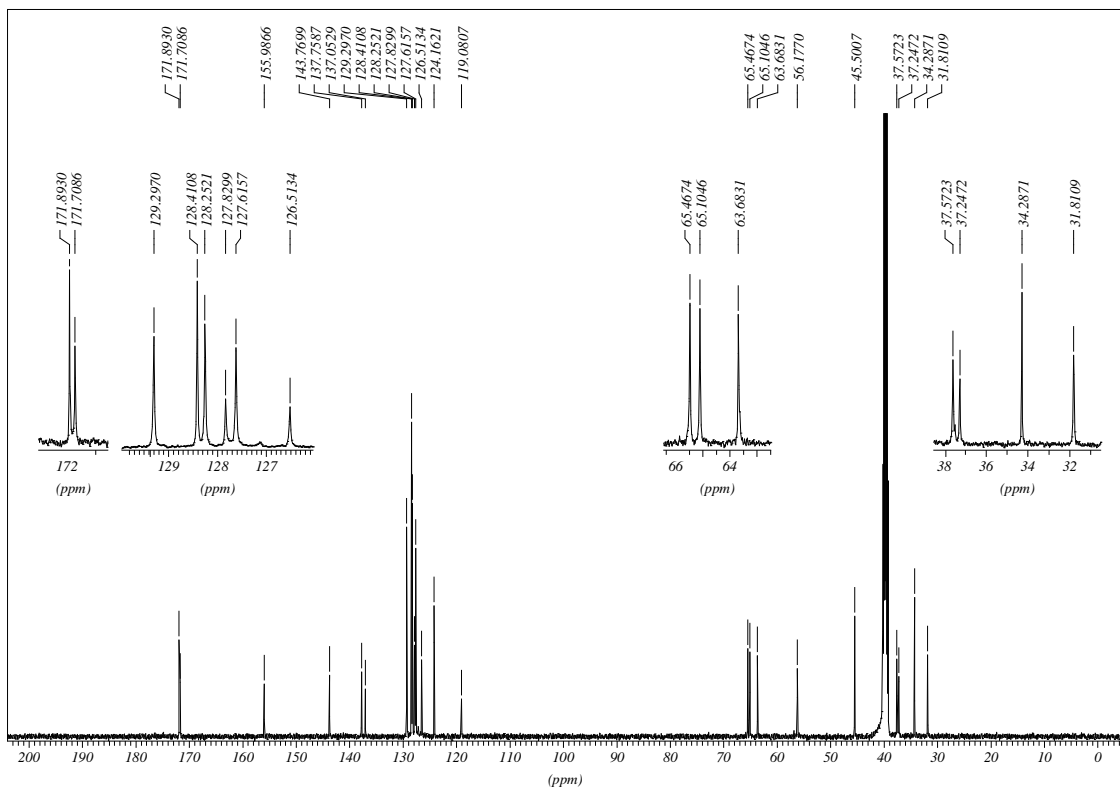

**(*S,S*)-*N*-(*tert*-Butyloxycarbonyl)-3-bromophenylalanyl-*O*-(propynyl)-serine amide (38)**

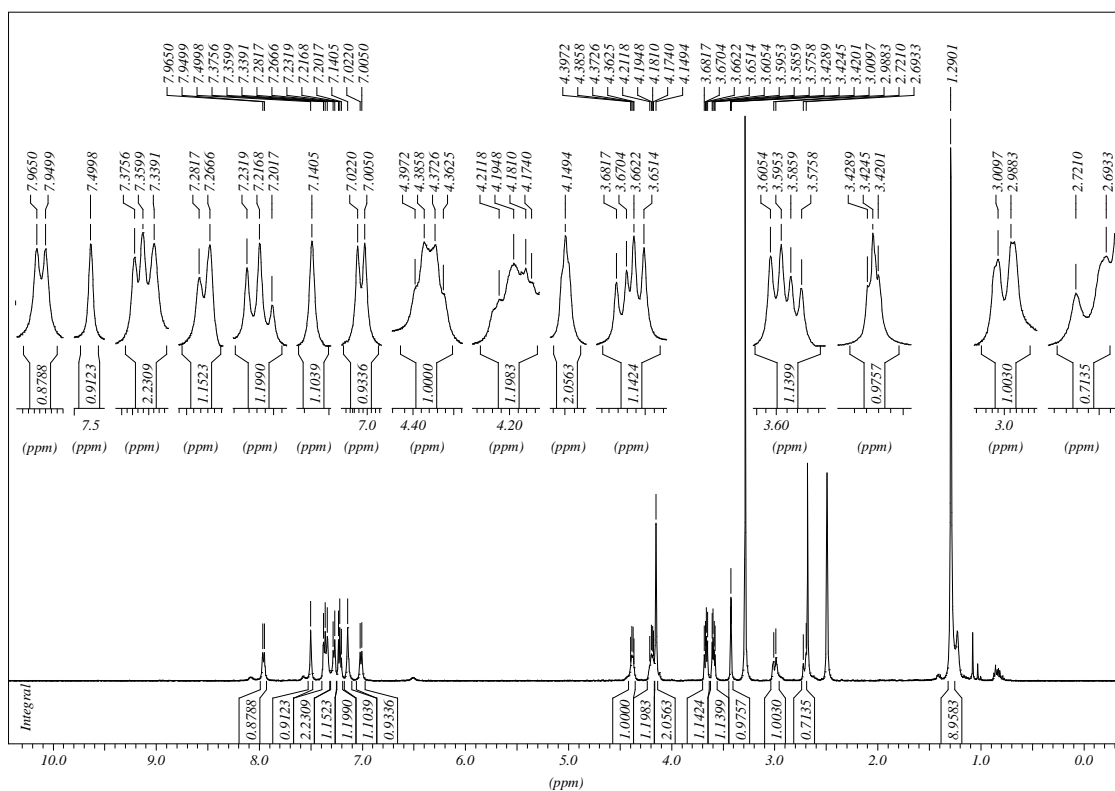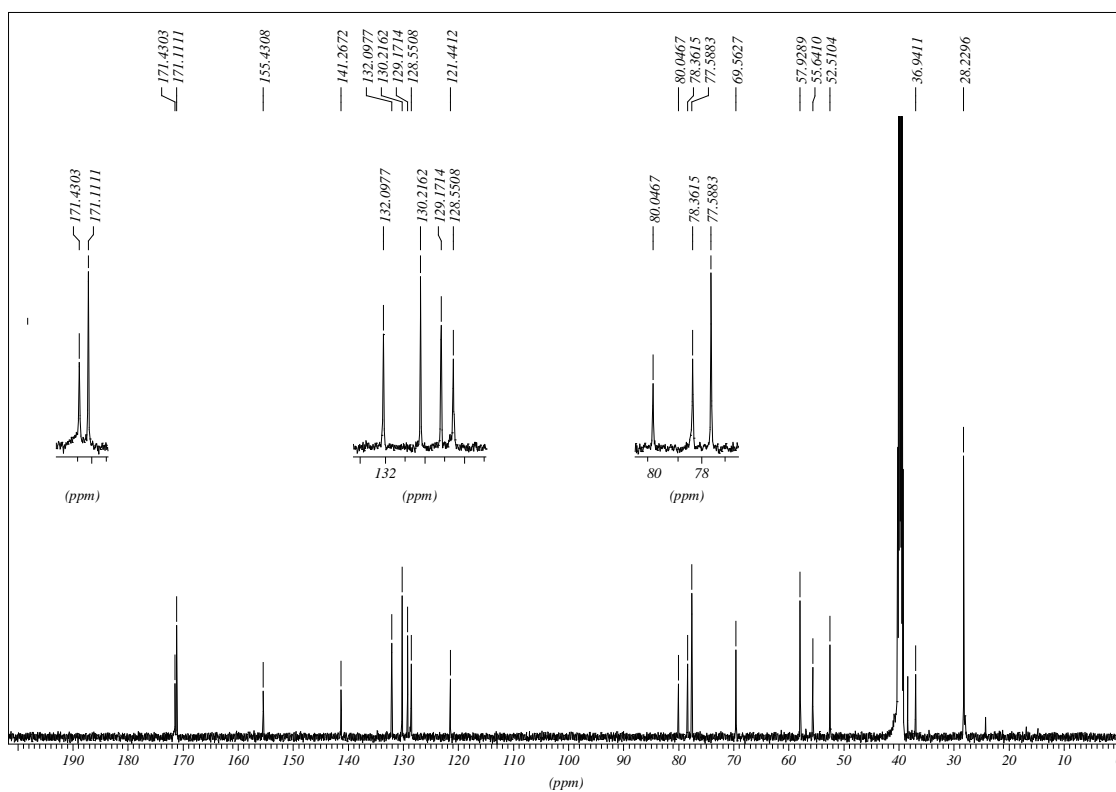

**(S,S)-N-(4-Phenylbenzoyl)-3-bromophenylalanyl-O-(propynyl)-serine amide (40)**

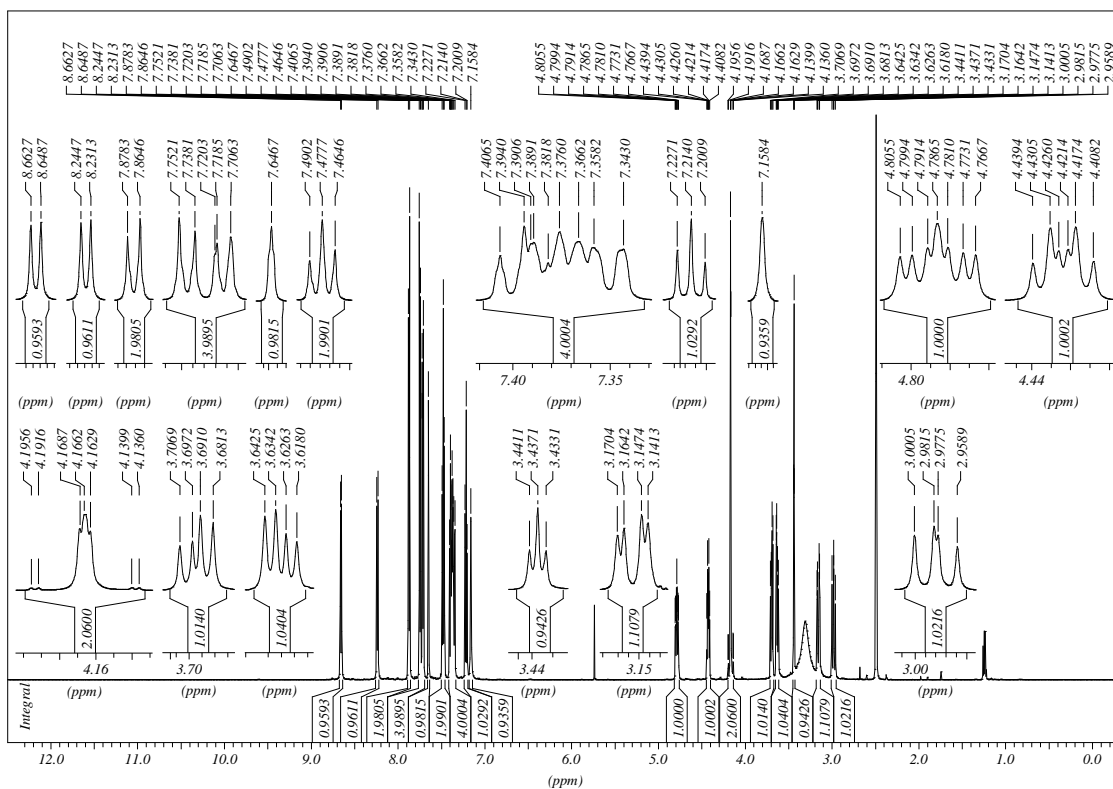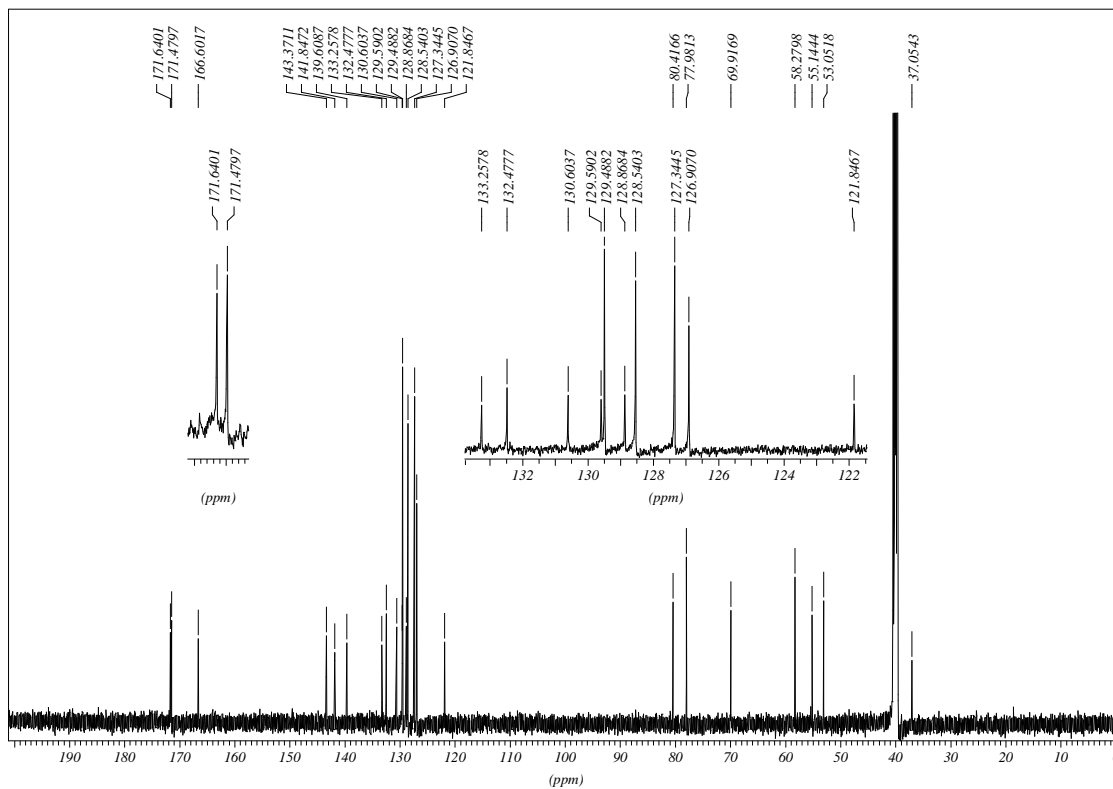



**(S,S)-N-(4-Phenylbenzoyl)-3-bromophenylalanyl-O-(propynyl)-serine nitrile (41)**

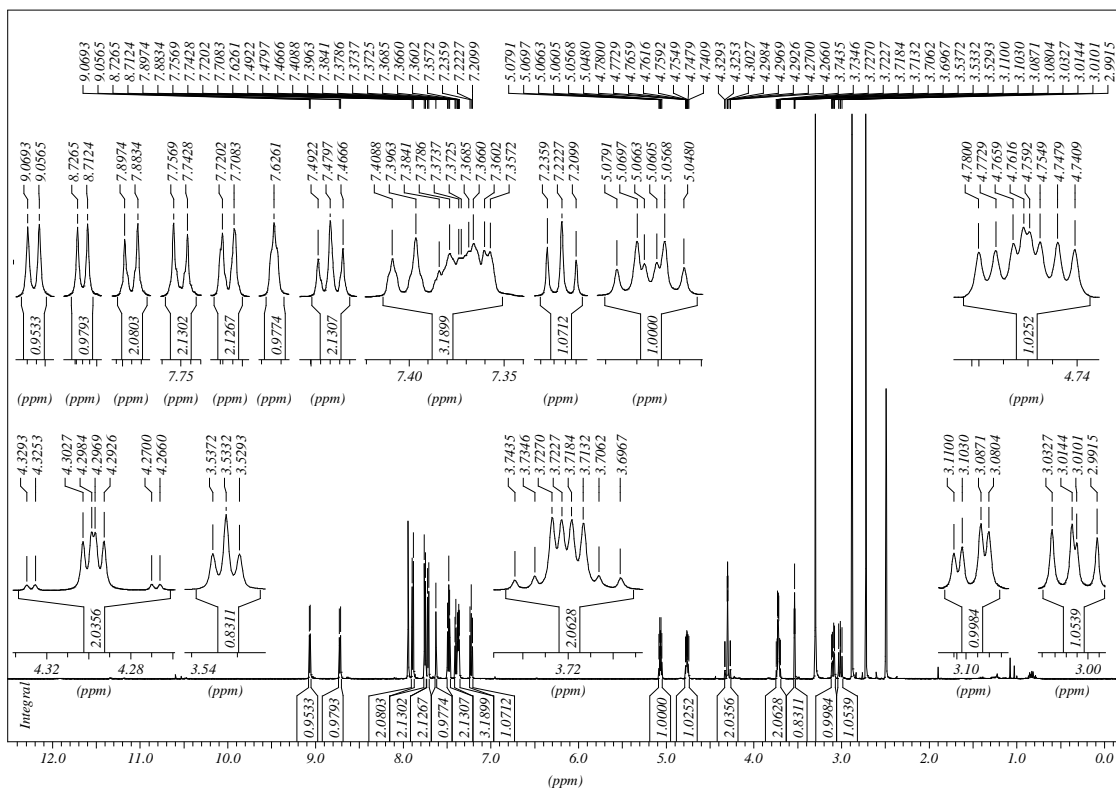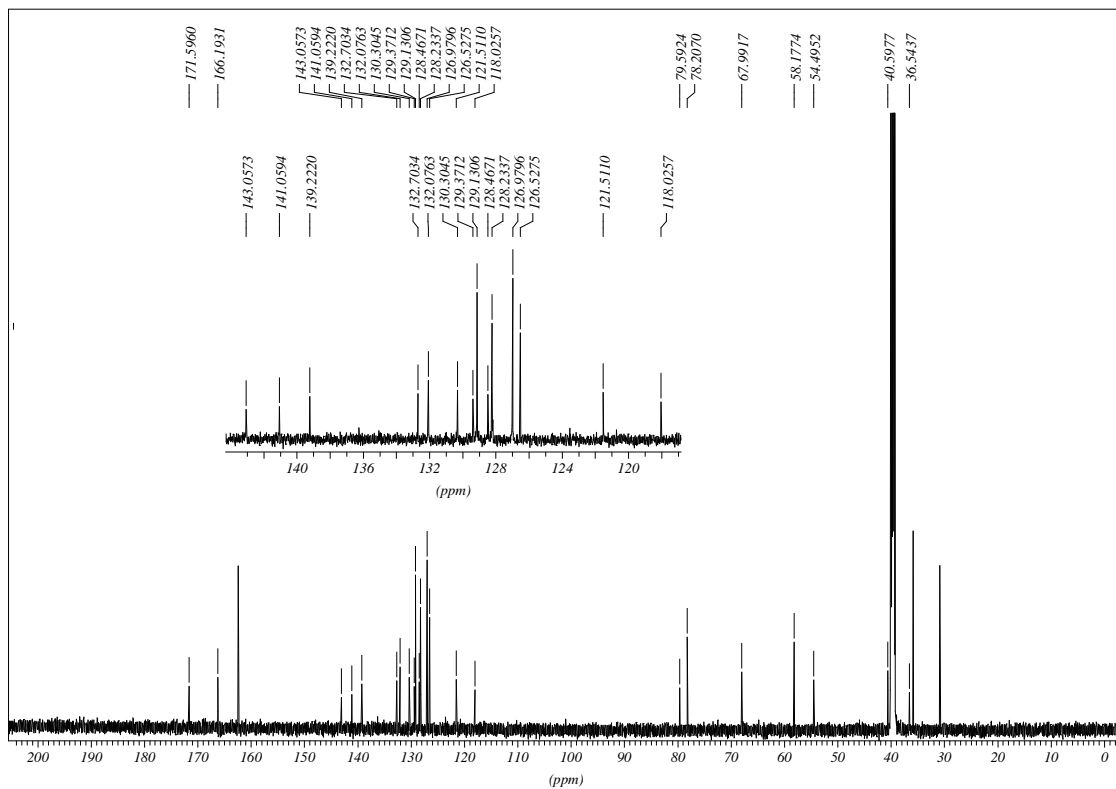

**(S,S)-N-(4-Phenylbenzoyl)-3-bromophenylalanyl-O-((1-(methoxycarbonylmethyl)-1H-1,2,3-triazol-4-yl)methyl)-serine nitrile (16)**

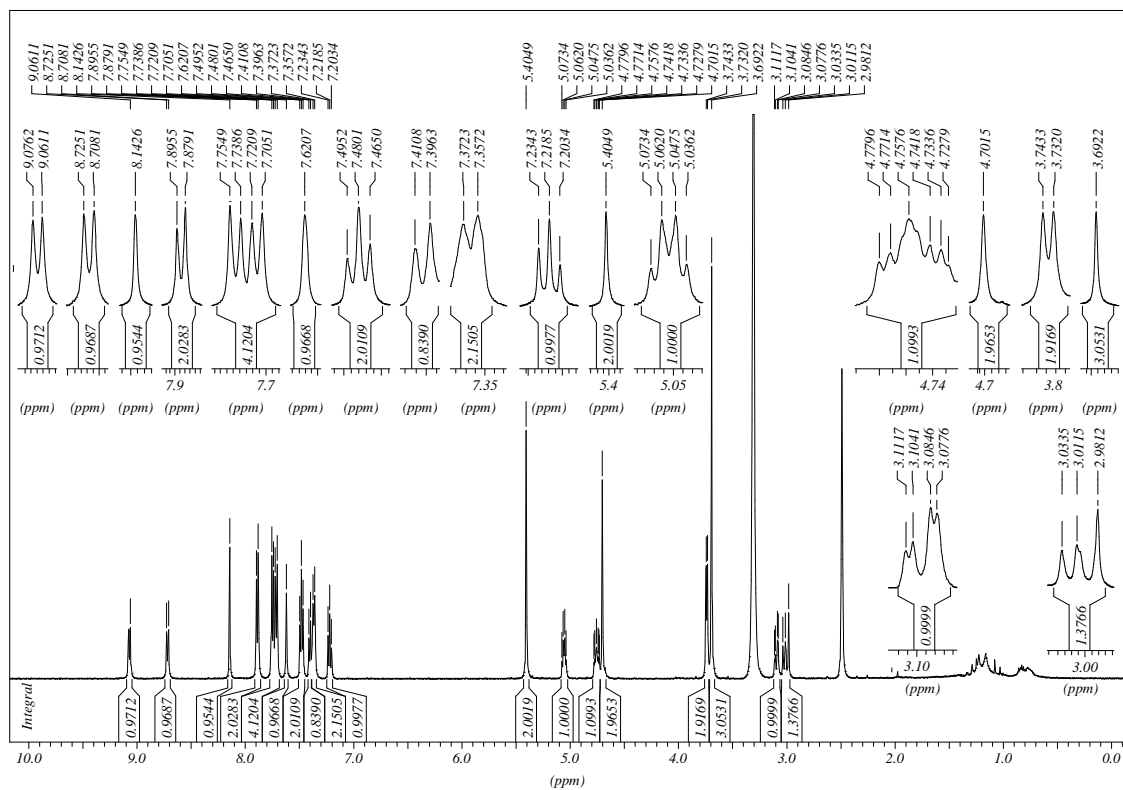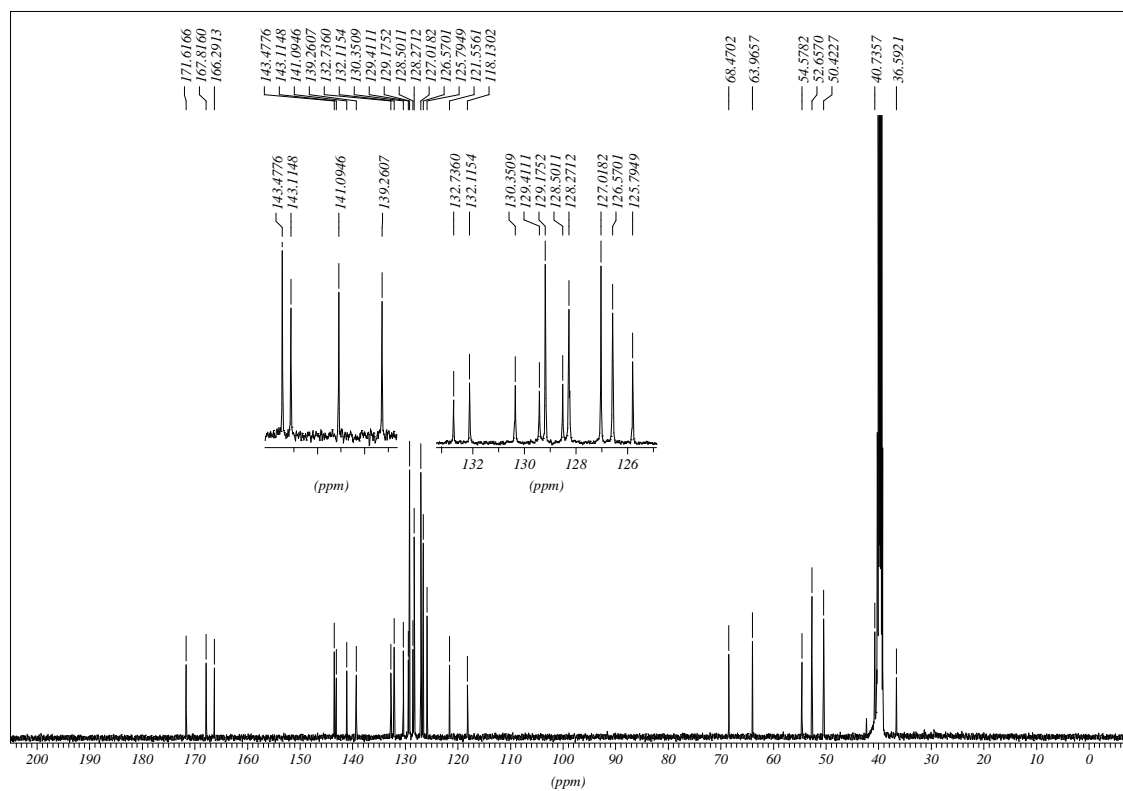

**(*S,S*)-*N*-(4-Phenylbenzoyl)-3-bromophenylalanyl-*O*-(methyl-1*H*-1,2,3-triazol-1-yl)acetic acid)-serine nitrile (17)**

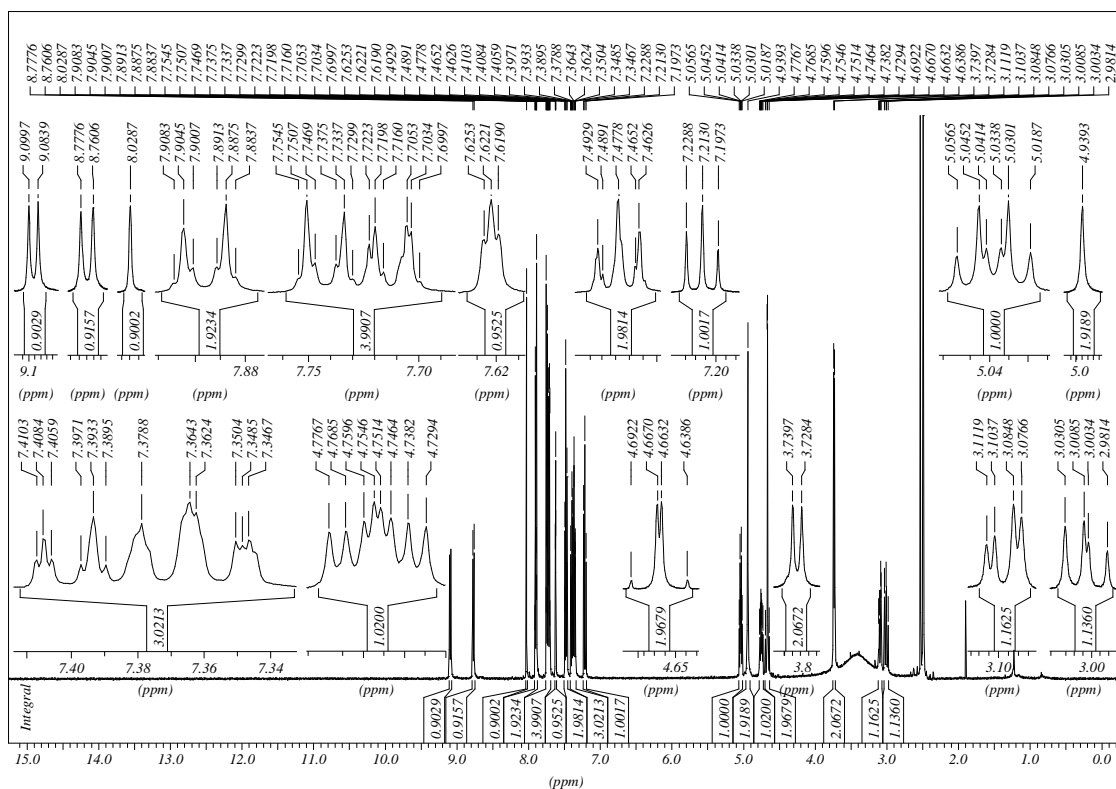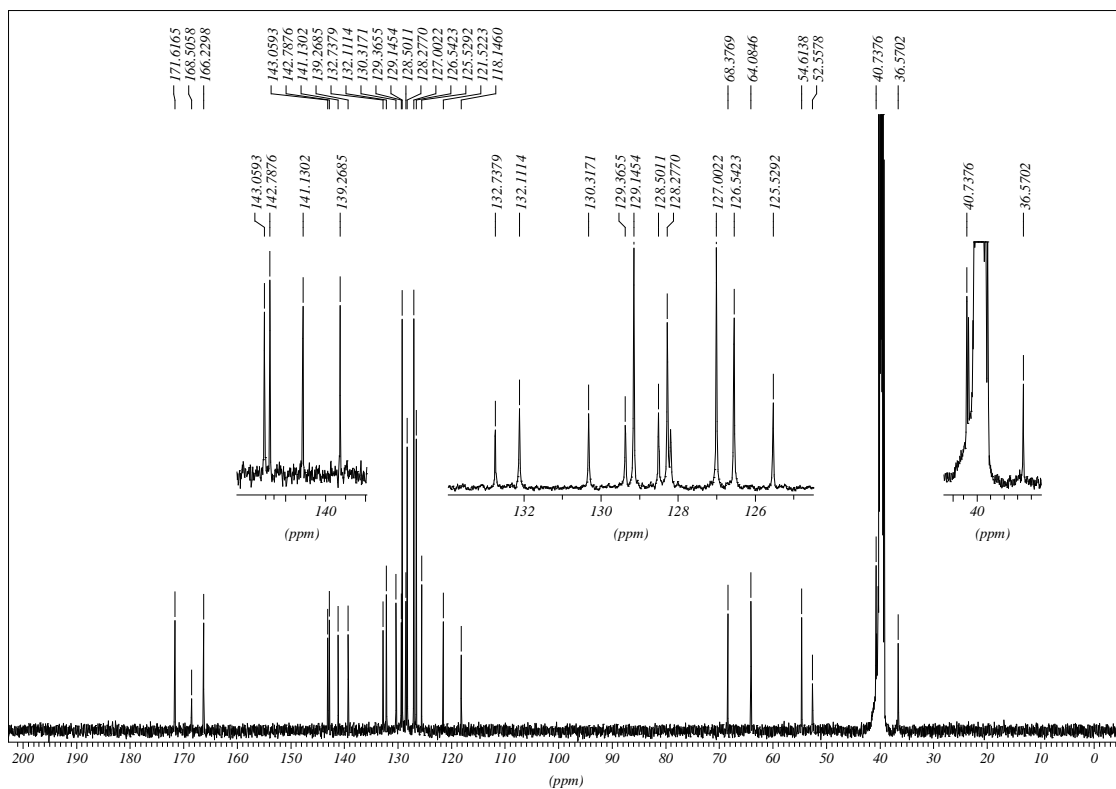

**(S)-N-(tert-Butyloxycarbonyl)-propargylglycine amide (45)**

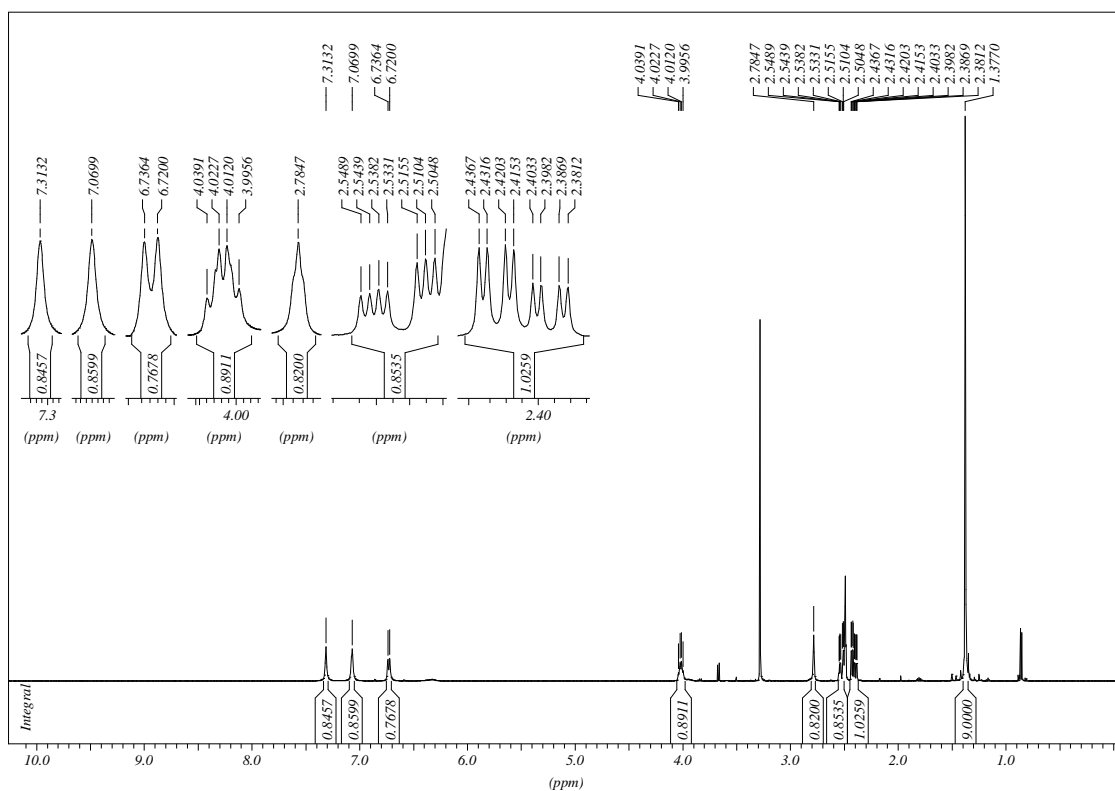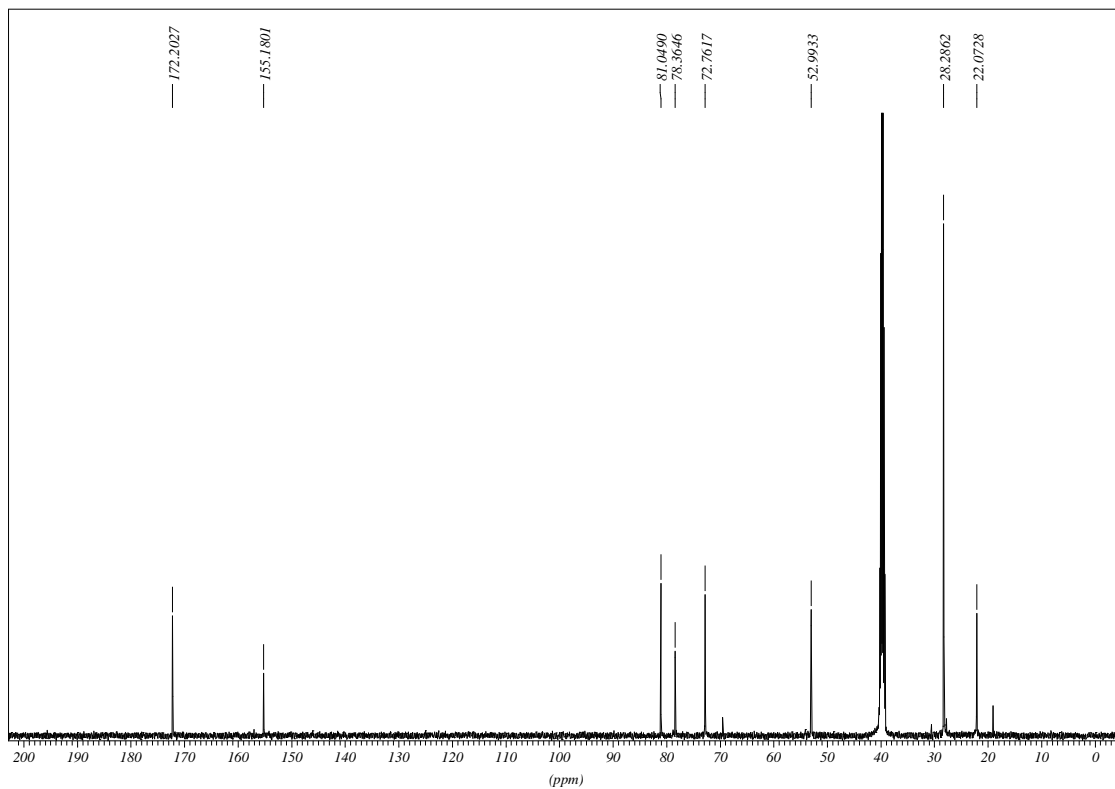

**(S,S)-N-(tert-Butyloxycarbonyl)-3-bromophenylalanyl-propargylglycine amide (47)**

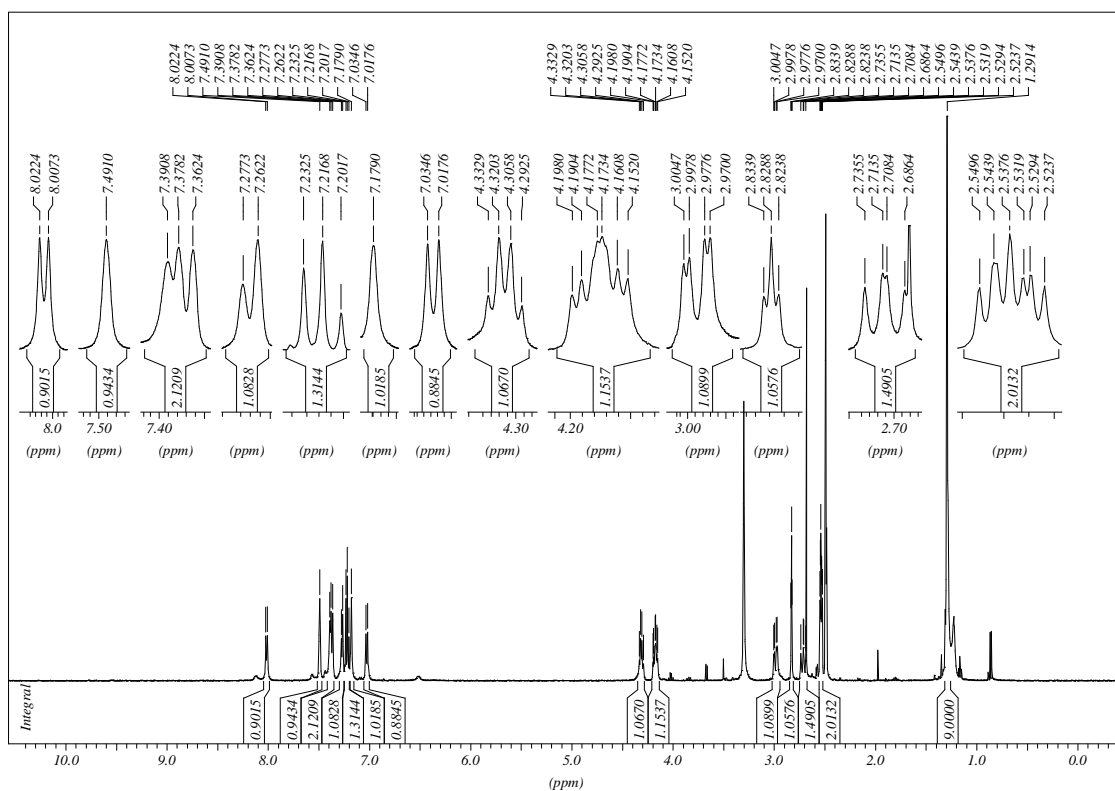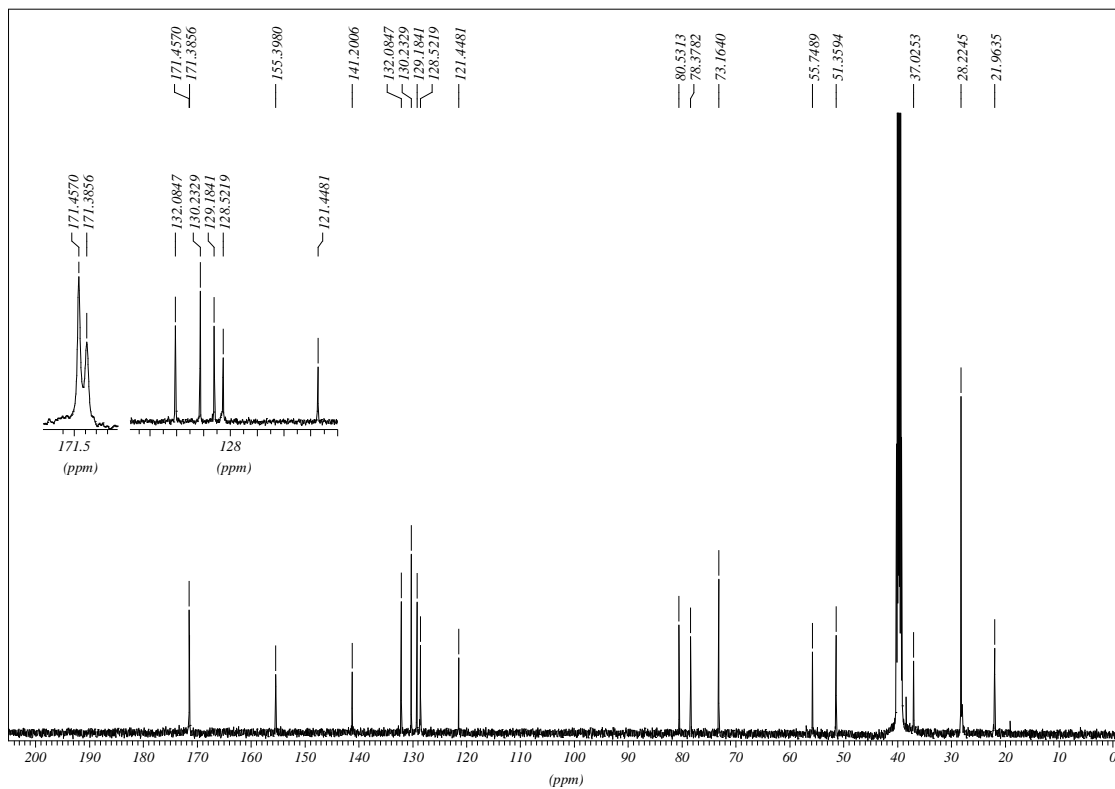

**(S,S)-N-(4-Phenylbenzoyl)-3-bromophenylalanyl-propargylglycine amide (49)**

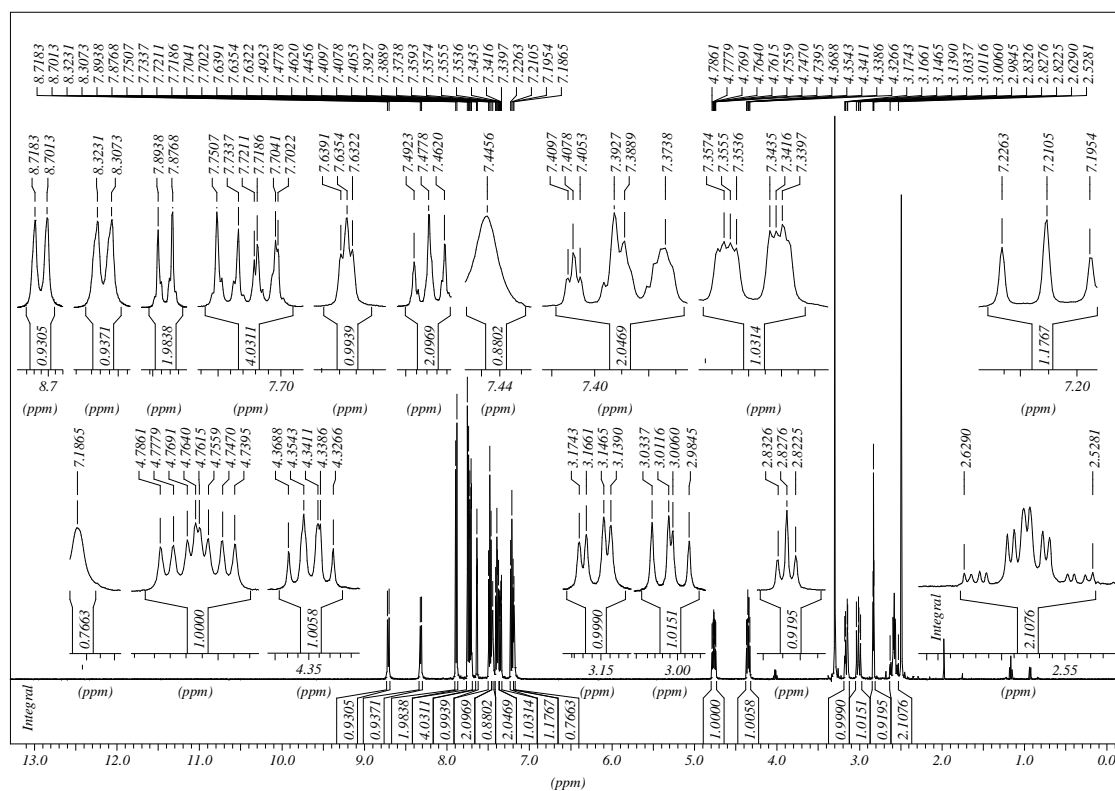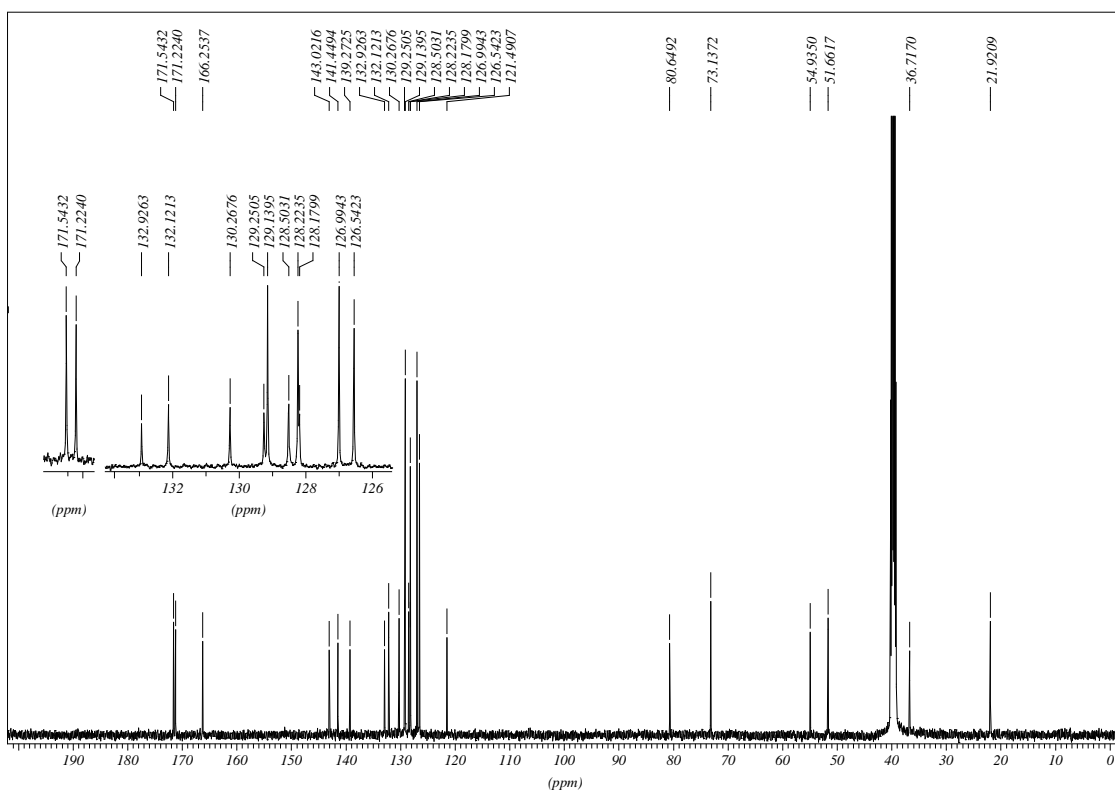

**(S,S)-N-(4-Phenylbenzoyl)-3-bromophenylalanyl-propargylglycine nitrile (50)**

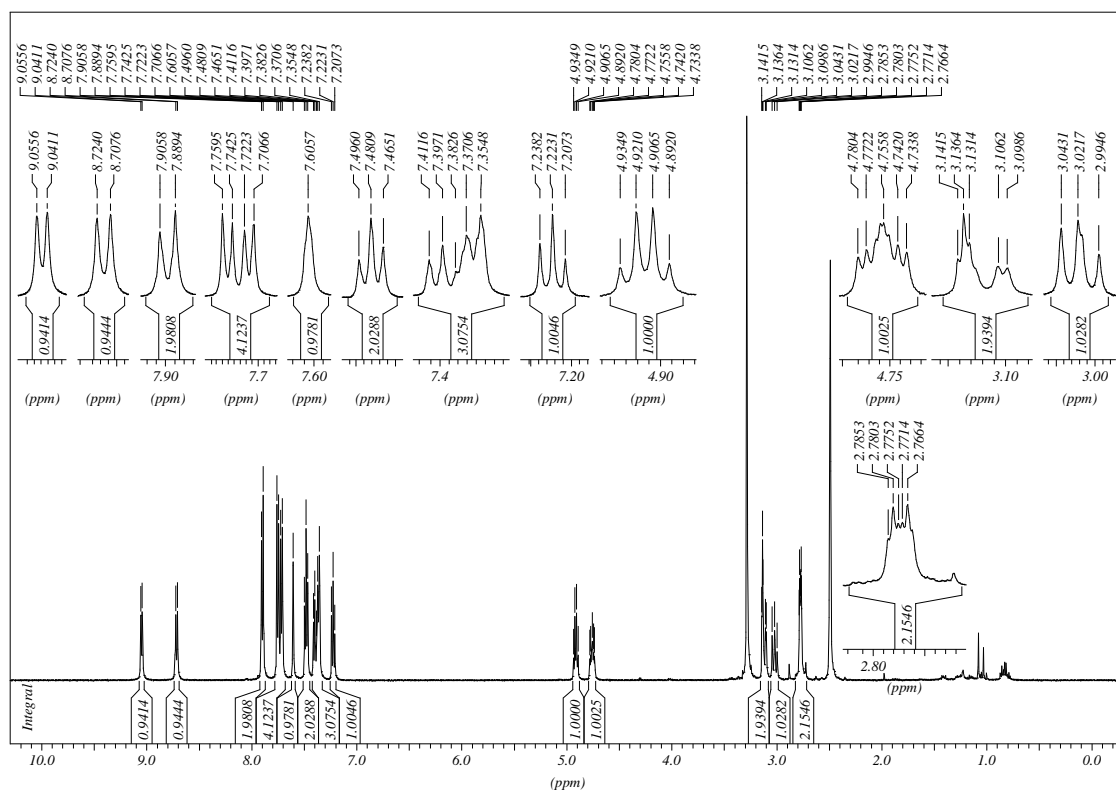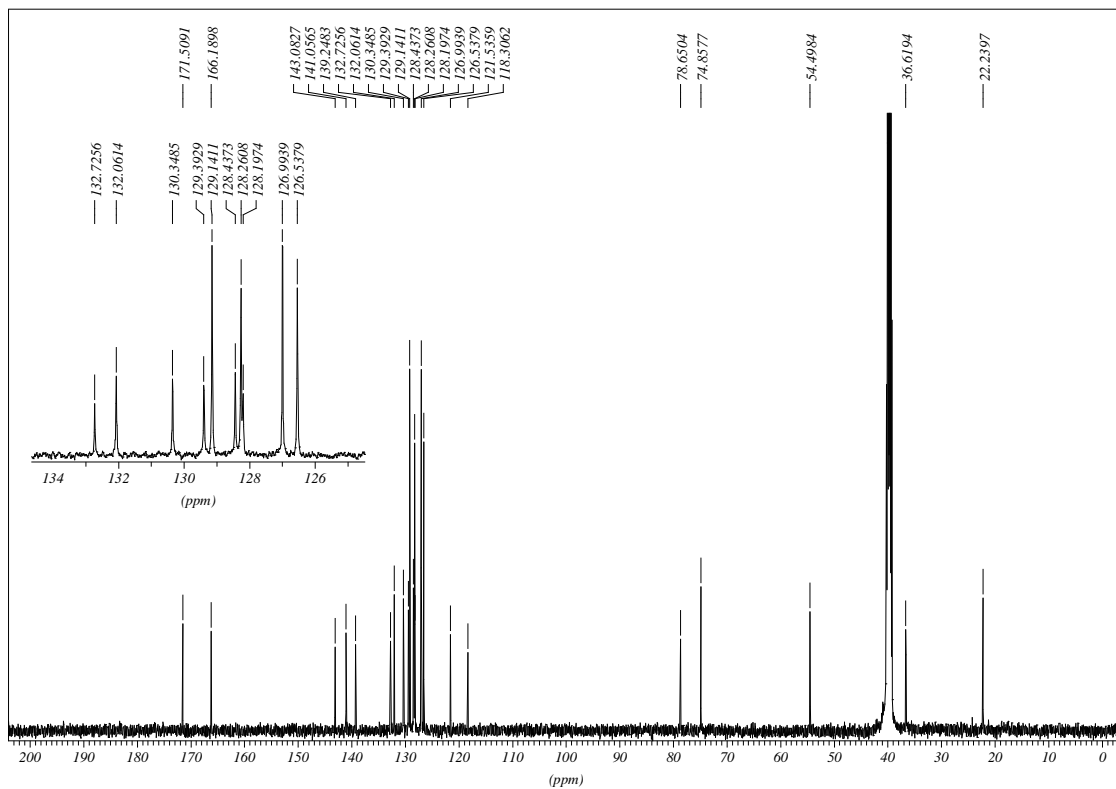

**(S,S)-N-(4-Phenylbenzoyl)-3-bromophenylalanyl-2-((1-(2-(carboxyethyl)-1H-1,2,3-triazol-4-yl)methyl)-glycine nitrile (18).**

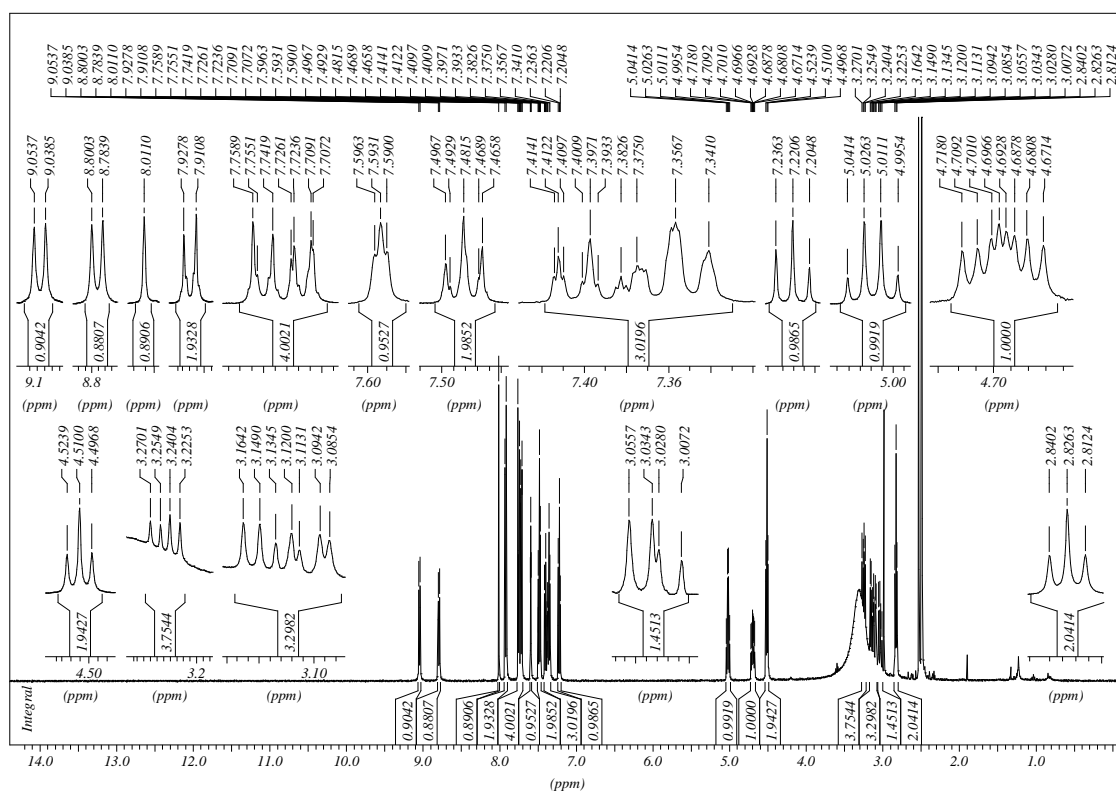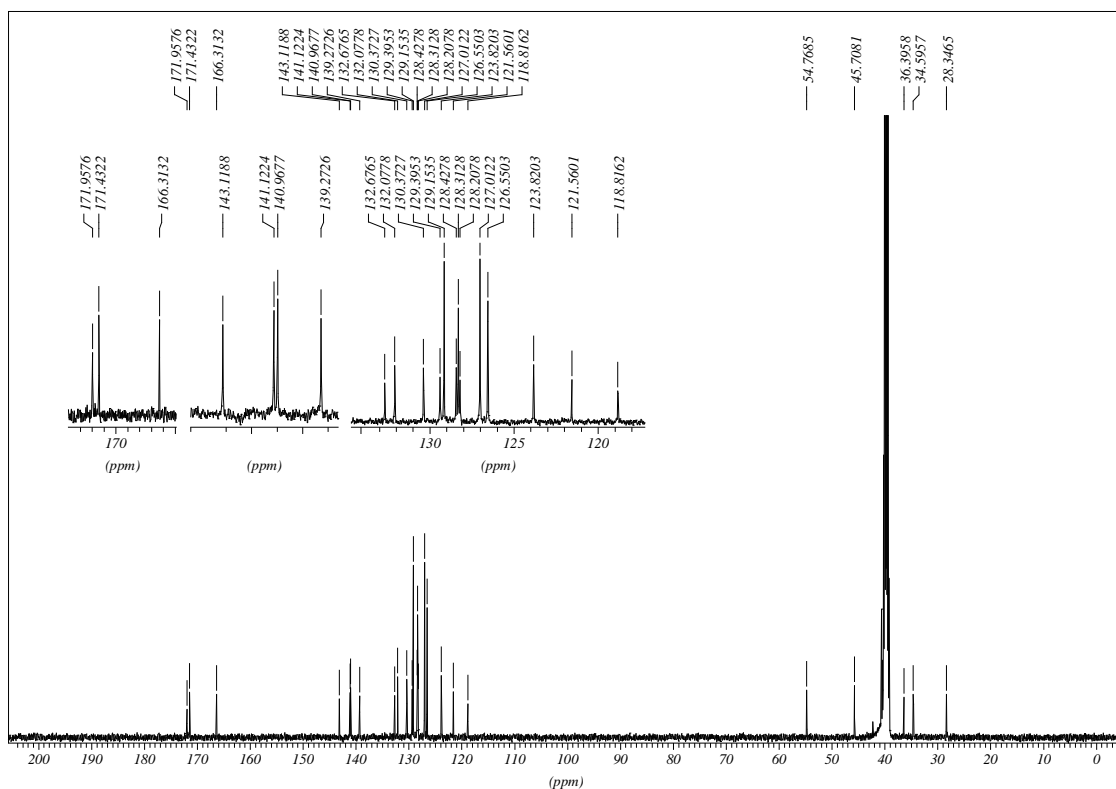



**(*S,S*)-*N*-(4-Phenylbenzoyl)-3-bromophenylalanyl-2-((1-(carboxymethyl)-1*H*-1,2,3-triazol-4-yl)methyl)-glycine nitrile (19).**

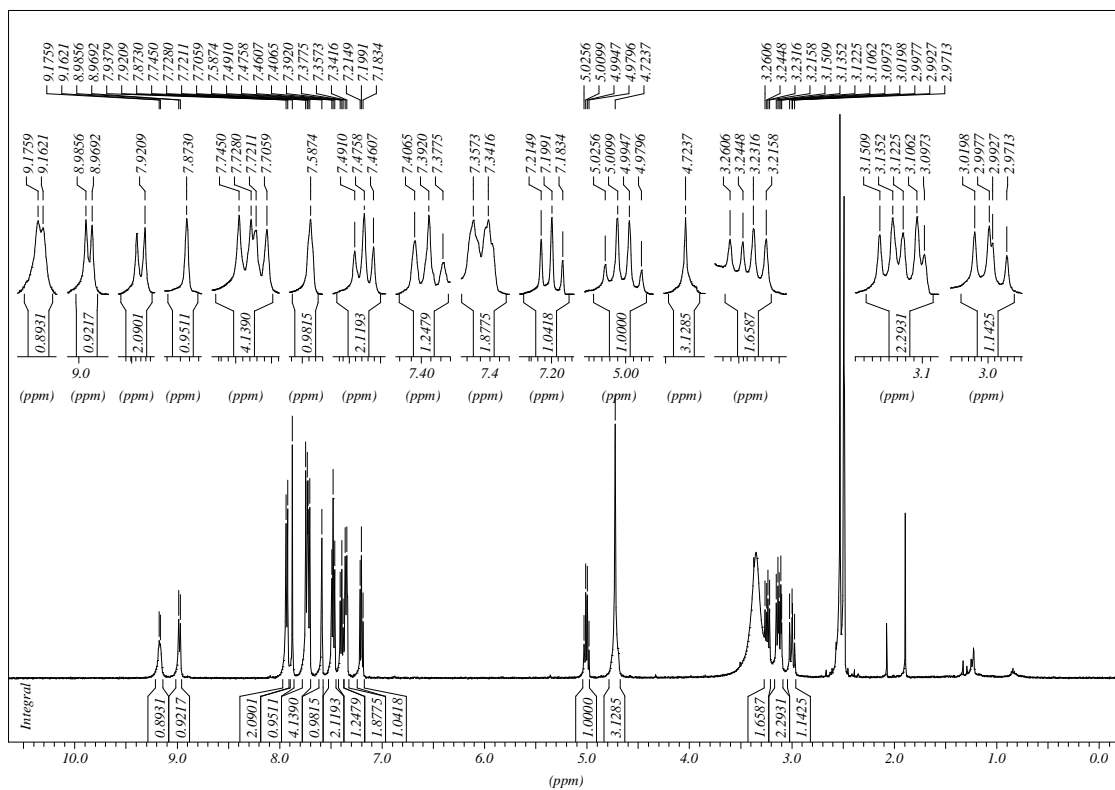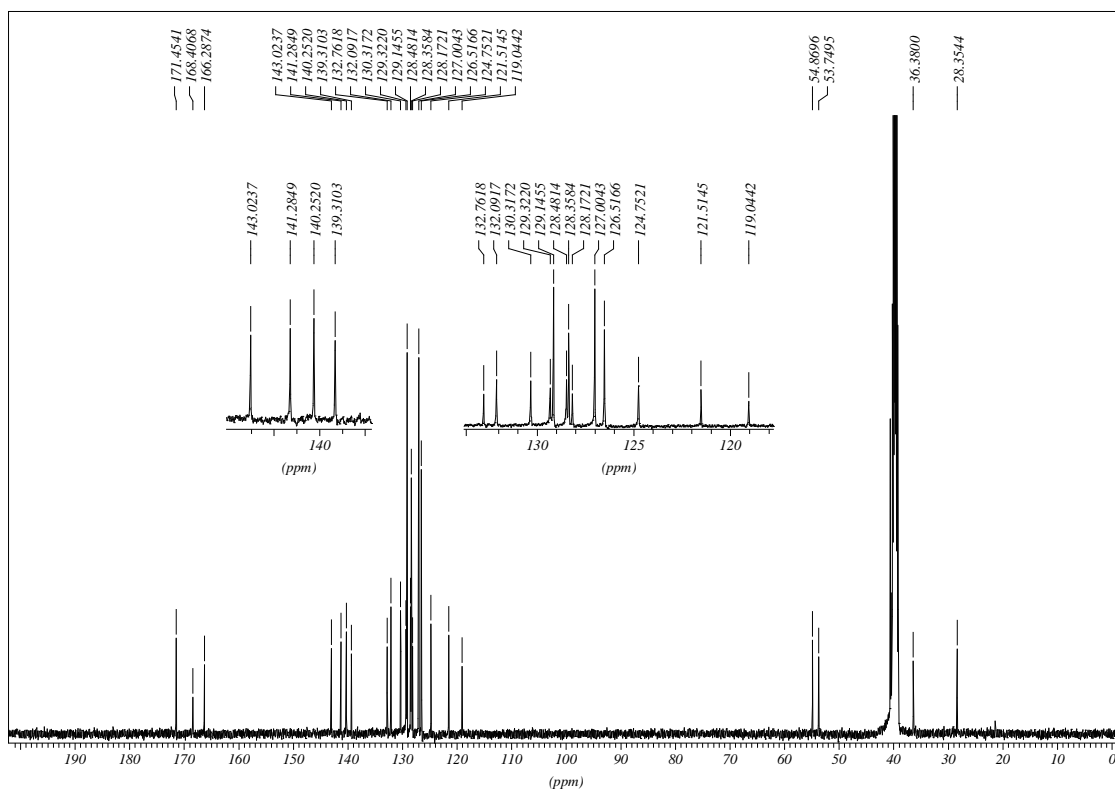

**(S)-N-(tert-Butyloxycarbonyl)-cyclohexylalanyl-glycine nitrile (57)**

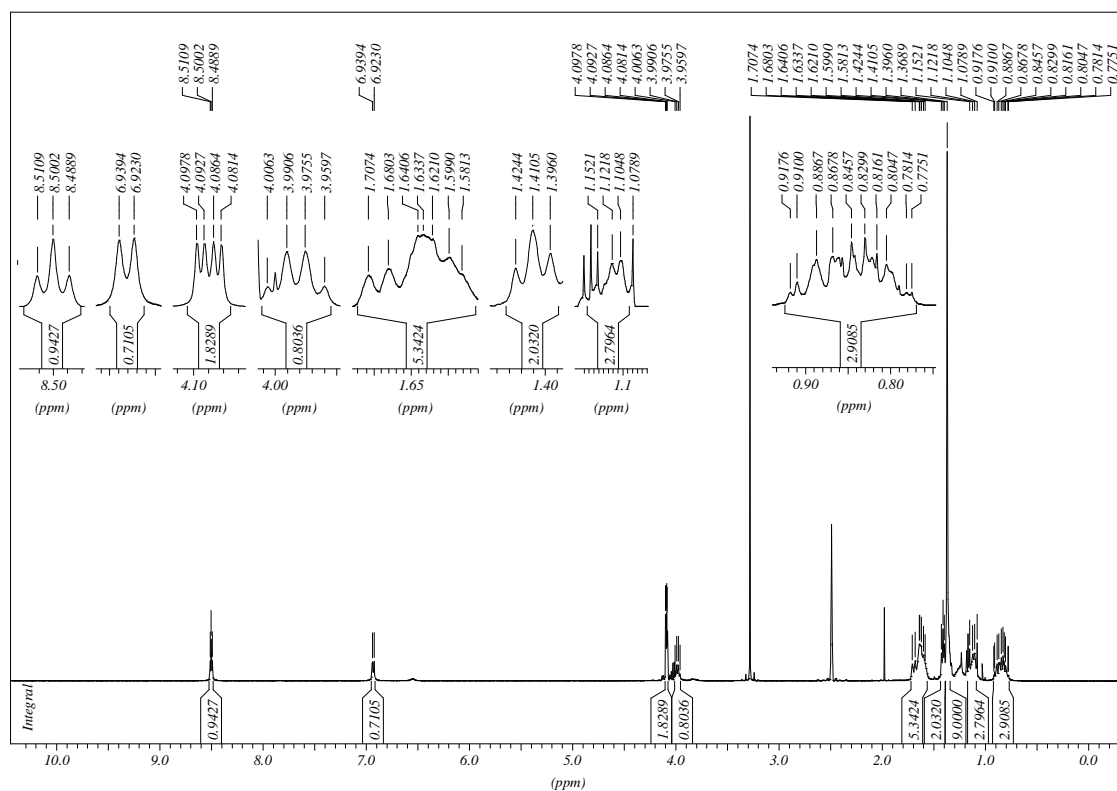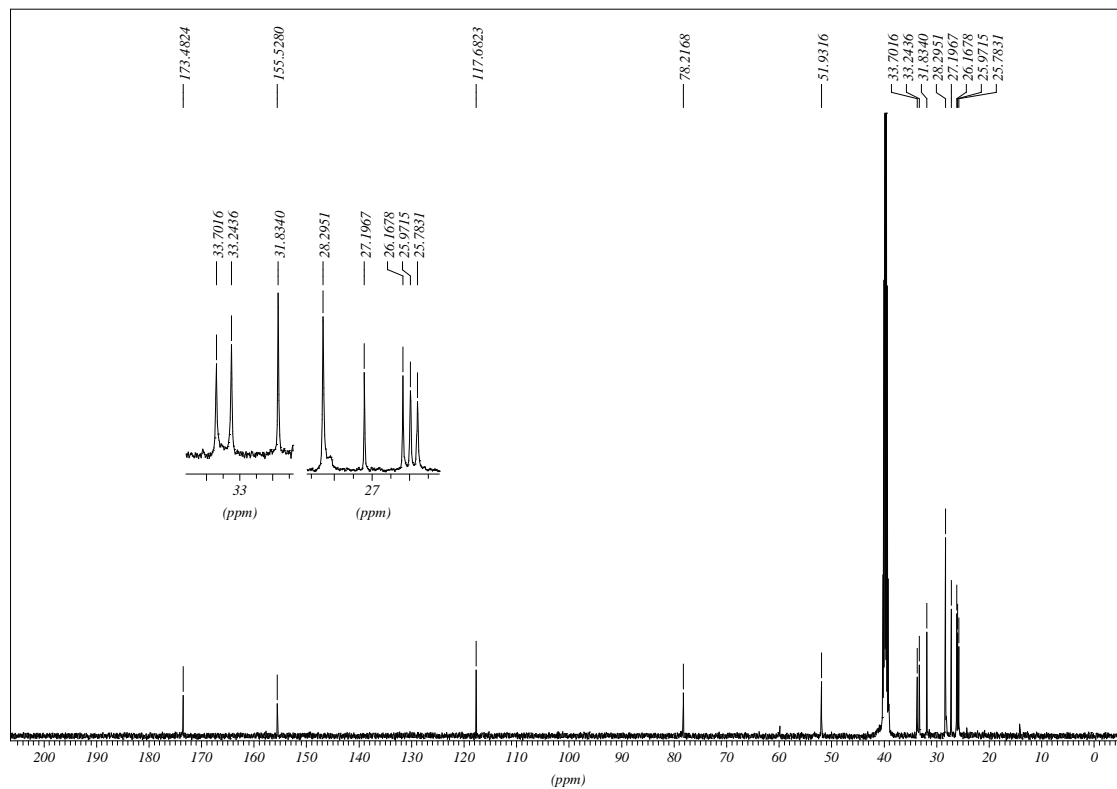

**(S)-N-(4-Phenylbenzoyl)-cyclohexylalanyl-glycine nitrile (91)**

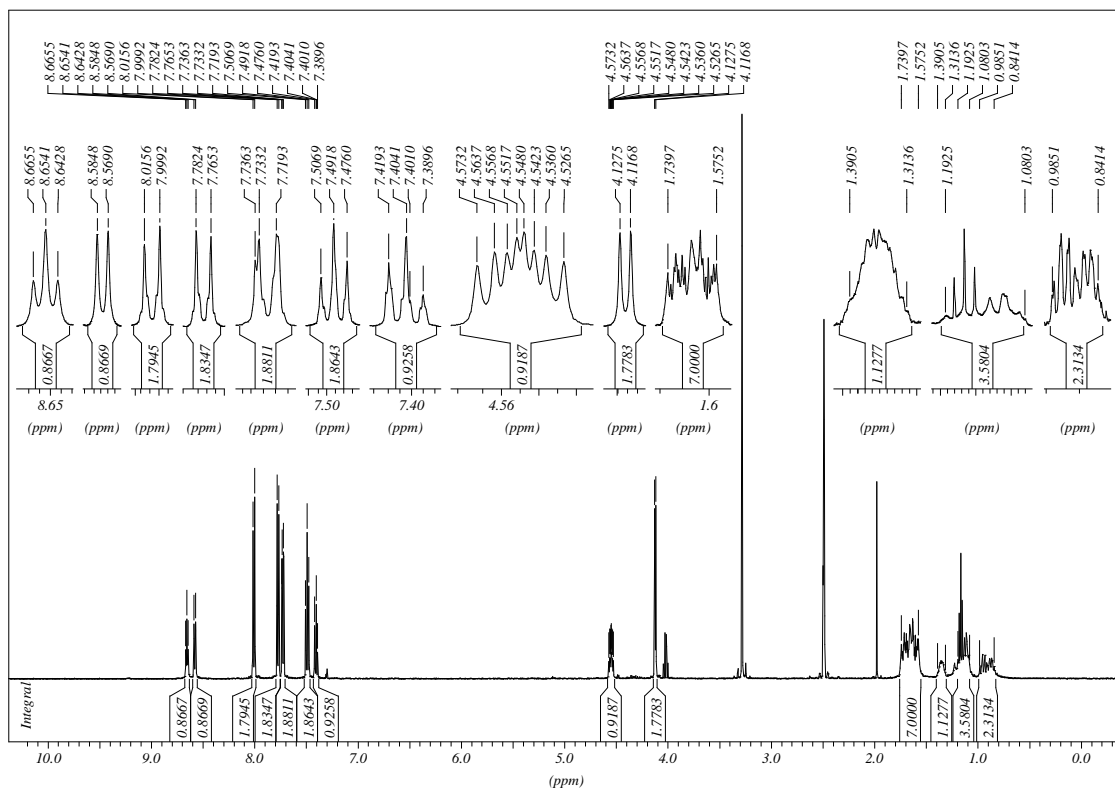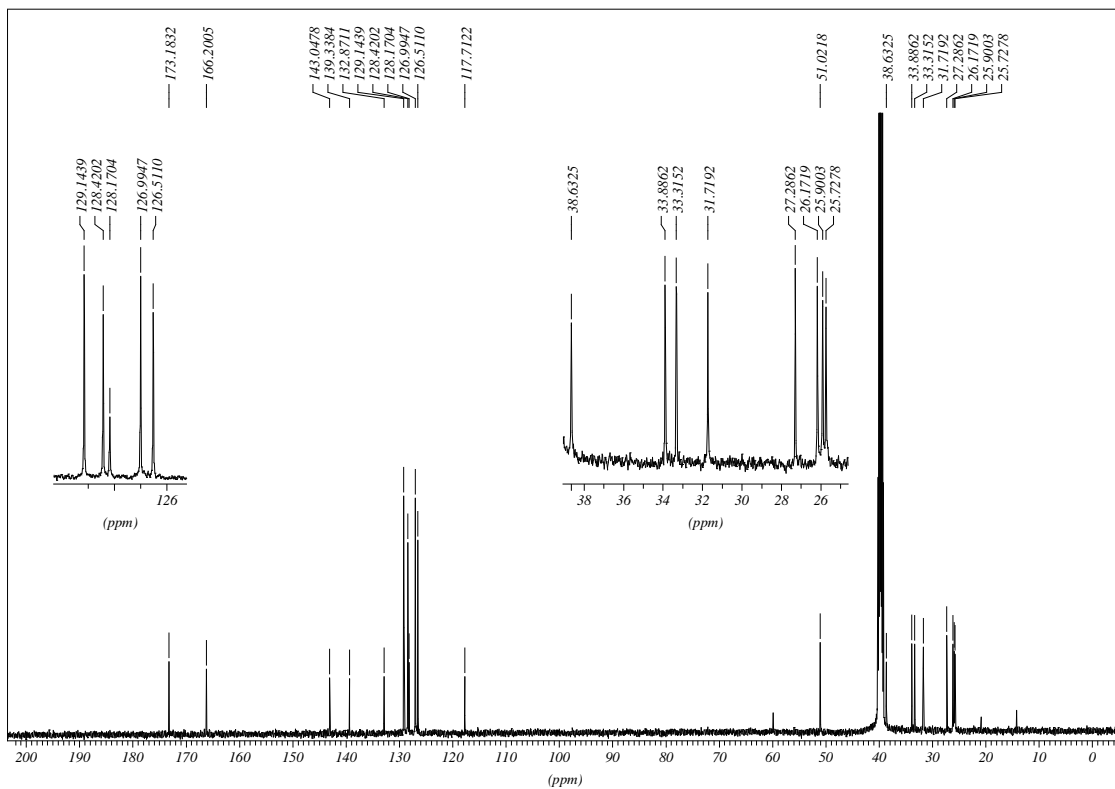

Supplement: ml5b00474_si_001.pdf [file ml5b00474_si_001.pdf]
